# Supplementary material for: Identification and Characterization of a β-N-Acetylhexosaminidase with a Biosynthetic Activity from the Marine Bacterium Paraglaciecola hydrolytica S66T
Source: MDPI journal article supplement (doi:10.3390/ijms21020417), 2020-01-09
Supplement: s1 [file s1]

# Identification and Characterization of a $\beta$ -N-Acetylhexosaminidase with a Biosynthetic Activity from the Marine Bacterium *Paraglaciecola hydrolytica* S66<sup>T</sup>

Triinu Visnapuu <sup>1,2,\*</sup>, David Teze <sup>1</sup>, Christian Kjeldsen <sup>3</sup>, Aleksander Lie <sup>4,a</sup>, Jens Øllgaard Duus <sup>3</sup>, Corinne André-Miral <sup>5</sup>, Lars Haastrup Pedersen <sup>4</sup>, Peter Stougaard <sup>6,b</sup> and Birte Svensson <sup>1,\*</sup>

<sup>1</sup> Department of Biotechnology and Biomedicine, Technical University of Denmark, Søtofts Plads, building 224, DK-2800, Kgs. Lyngby, Denmark; triinu.visnapuu@ut.ee (T.V.); david.teze@gmail.com (D.T.); bis@bio.dtu.dk (B.S.)

<sup>2</sup> Institute of Molecular and Cell Biology, University of Tartu, Riia 23, 51010 Tartu, Estonia

<sup>3</sup> Department of Chemistry, Technical University of Denmark, Kemitorvet, building 207, DK-2800, Kgs. Lyngby, Denmark; chkje@kemi.dtu.dk (C.K.); jduus@kemi.dtu.dk (J.Ø.D.)

<sup>4</sup> Department of Chemistry and Bioscience, Aalborg University, Fredrik Bajers Vej 7, H, DK-9220, Aalborg, Denmark; lhp@bio.aau.dk (L.H.P.); al@kebony.com (A.L.)

<sup>5</sup> Université de Nantes, CNRS, Unité de Fonctionnalité et Ingénierie des Protéines (UFIP), UMR 6286, F-44000 Nantes, France; corinne.miral@univ-nantes.fr (C.A.-M.)

<sup>6</sup> Department of Plant and Environmental Sciences, University of Copenhagen, Thorvaldsensvej 40, DK-1871, Frederiksberg C, Denmark; pst@envs.au.dk (P.S.)

\* Correspondence: triinu.visnapuu@ut.ee; Tel.: +372-737-5013 (T.V.); bis@bio.dtu.dk; Tel.: +45-4525-2740 (B.S.)

<sup>a</sup> Present affiliation: Kebony Norge AS, Havneveien 35, NO-3739, Skien, Norway

<sup>b</sup> Present affiliation: Department of Environmental Science - Environmental Microbiology and Circular Resource Flow, Aarhus University, Frederiksborgvej 399, building 7411, B2.12, DK-4000, Roskilde, Denmark

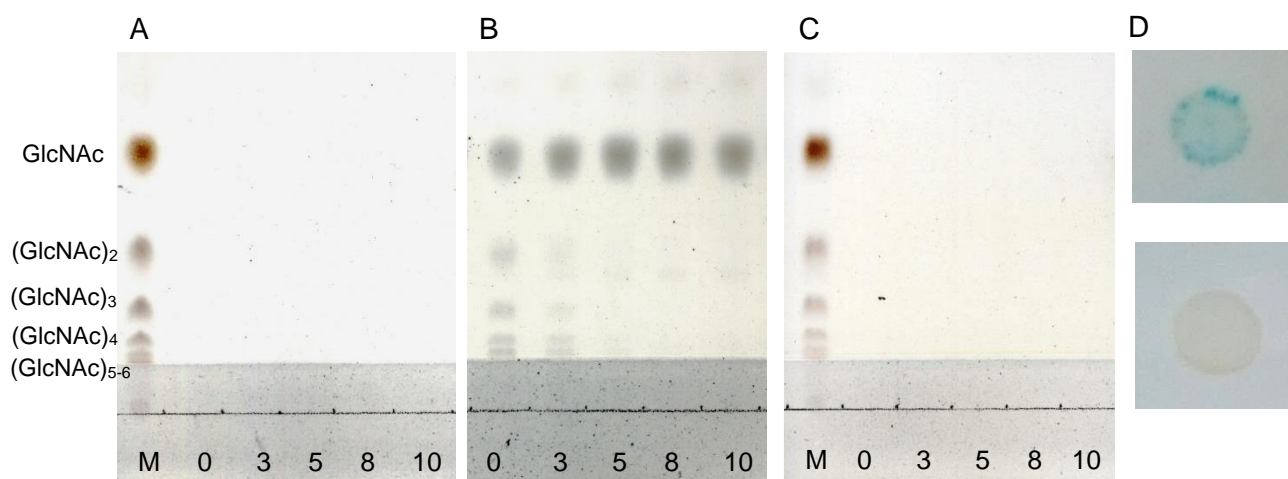

**Fig S1. TLC analysis of growth media of *P. hydrolytica* (A, B, C) and growth phenotype on marine agar medium with X-GlcNAc (5-bromo-4-chloro-3-indolyl *N*-acetyl- $\beta$ -D-glucosaminide) (D).** The strain *P. hydrolytica* S66<sup>T</sup> was growing up to 10 days (indicated on Figure S1) at 23 °C in marine mineral medium supplemented with 5 g L<sup>-1</sup> chitooligosaccharides (B) or 2 g L<sup>-1</sup>  $\alpha$ -chitin (C) as a sole carbon source. The medium without added carbon source was inoculated with *P. hydrolytica* and used for comparison (A). M – marker, chitooligosaccharides (DP 1–6, from Koyo Chemicals). Culture supernatant (0.5  $\mu$ L) was spotted on TLC plates, developed in chloroform: acetic acid: water (6:7:1, v:v:v). Sugars were visualized using aniline dye (1.2% aniline hydrochloride and 1.2% diphenylamine in acidic methanol). Panels A and B are from the same TLC plate. *P. hydrolytica* inoculated on marine agar medium supplemented with X-GlcNAc (5-bromo-4-chloro-3-indolyl *N*-acetyl- $\beta$ -D-glucosaminide) (D, upper panel) was incubated 5 d at 23 °C. The phenotype of the bacterium on marine agar without supplement is shown for comparison (D, lower panel).

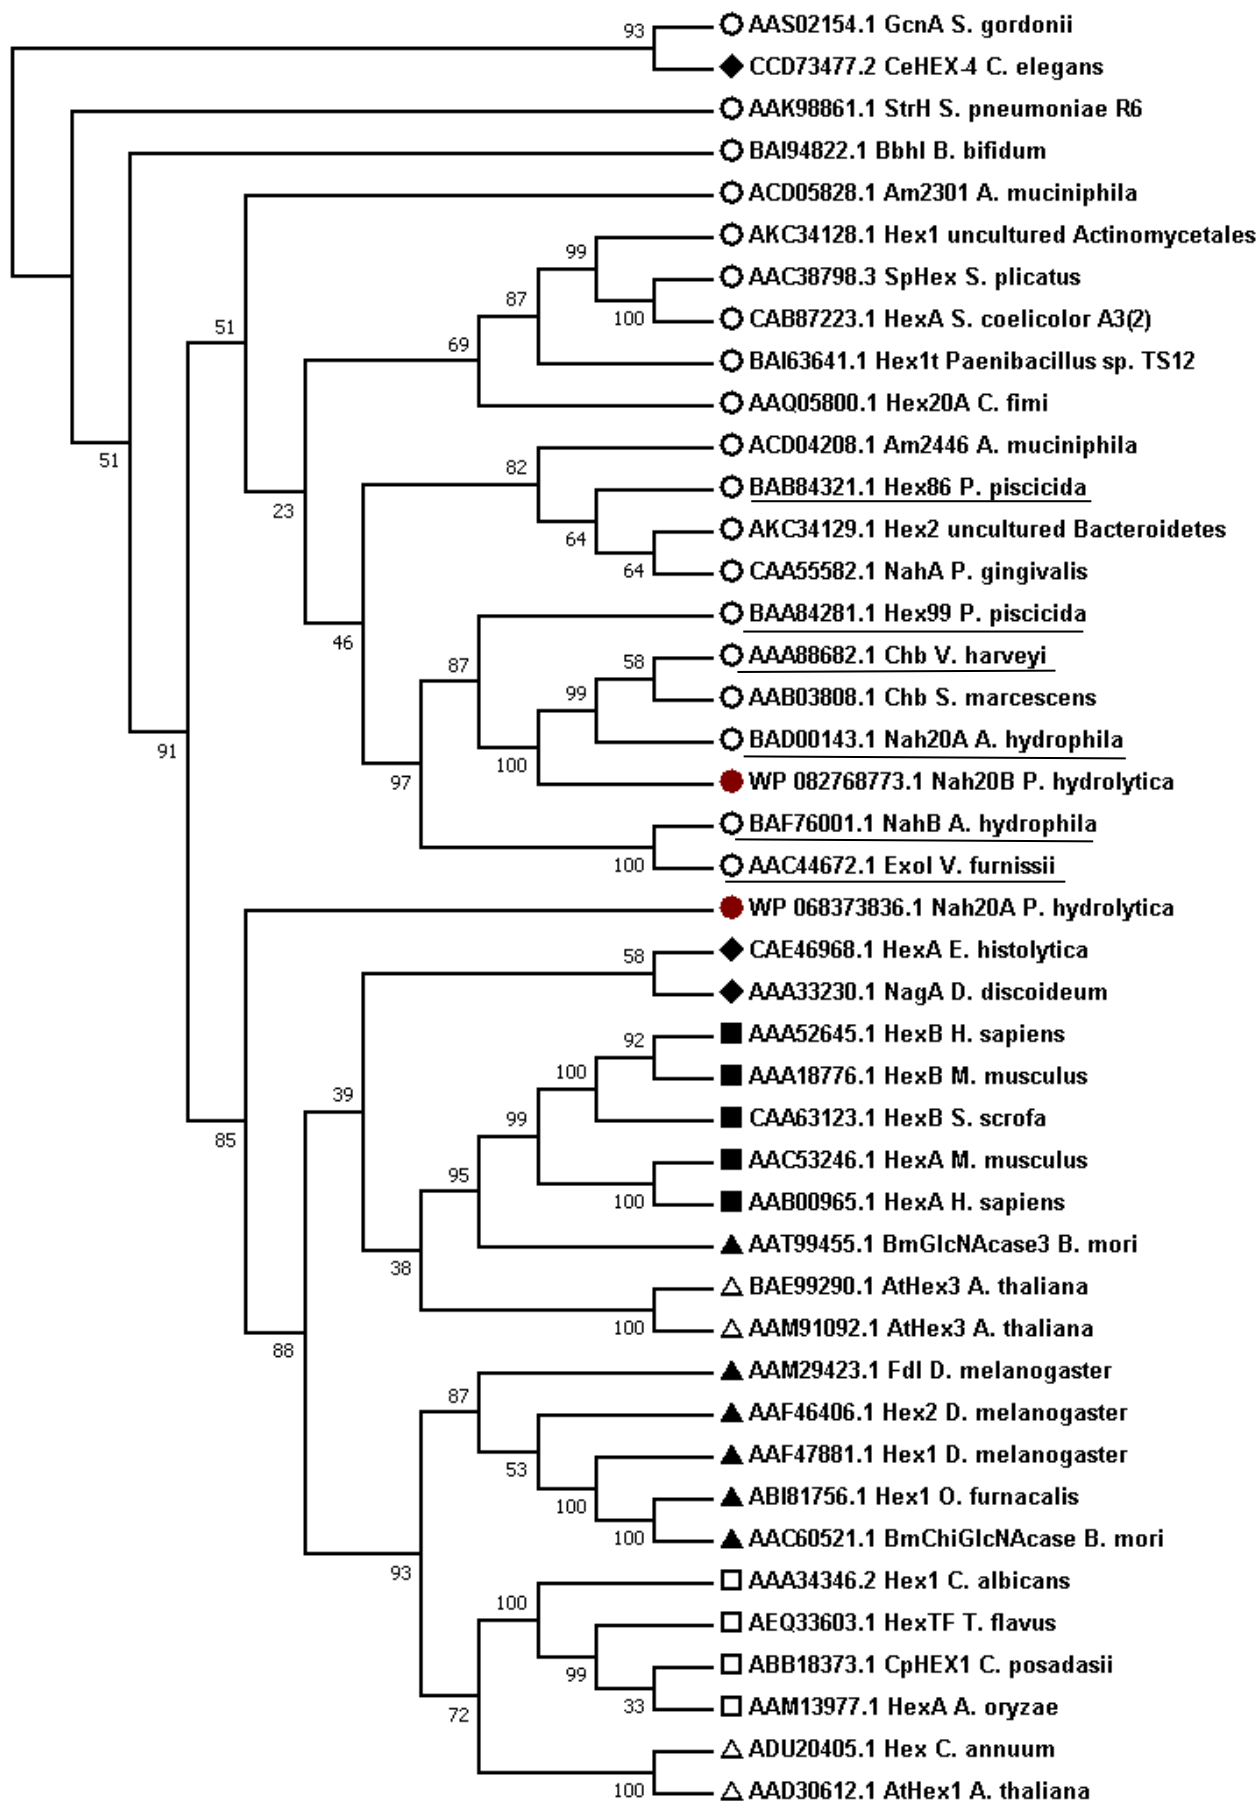

**Fig S2. Phylogenetic tree with bootstrap test (1000 replicates) of *PhNah20A*, *PhNah20B* (both marked with red circles) and 41 biochemically characterised GH20 (EC 3.2.1.52) enzymes.**

Evolutionary analyses were conducted, and the tree was composed and visualised using MEGA7. Protein sequences were aligned with Clustal Omega and BLOSUM62 protein weight matrix was used. Evolutionary relationships were calculated using the Neighbor-Joining method and the evolutionary distances were computed using the Poisson correction method. All positions containing gaps and missing data were eliminated and overall the final dataset contains total of 296 positions in the final dataset. The percentage of replicate trees in which the associated taxa clustered together in the bootstrap test are shown next to the branches. Bacterial (○), fungal (□), plant (Δ), insect (▲), and mammal (■) sequences. Amoebae and *C. elegans* sequences are marked with filled diamond (◆).

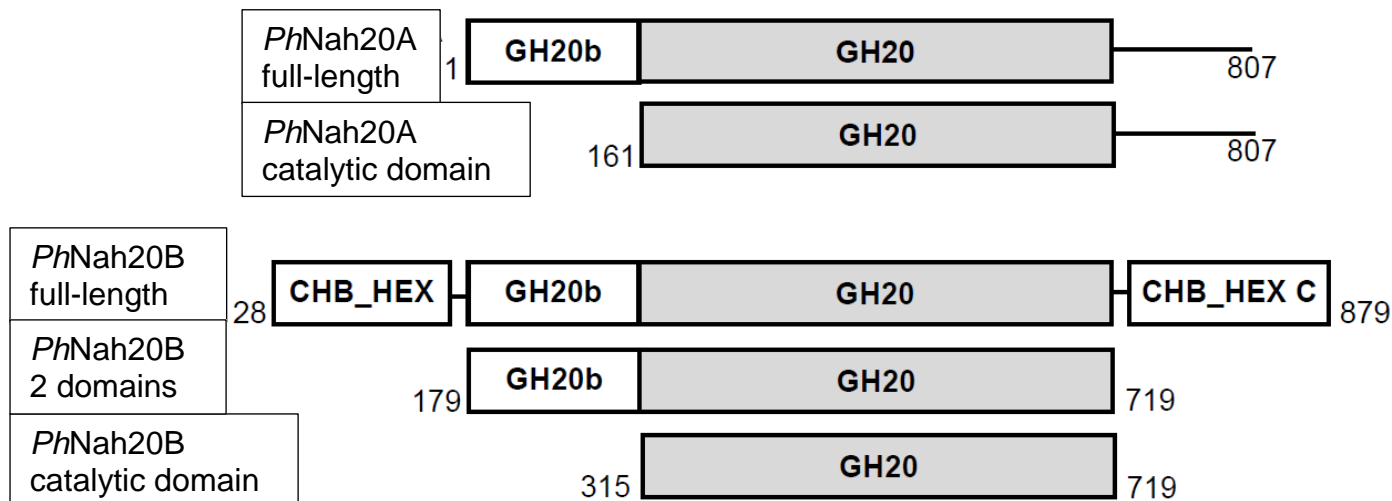

**Fig S3. Schematic domain architecture of full-length and truncated variants of *PhNah20A* and *PhNah20B*.** Catalytic domains of the GH20 enzymes are grey. Predicted start and end amino acid positions of the domains are shown.

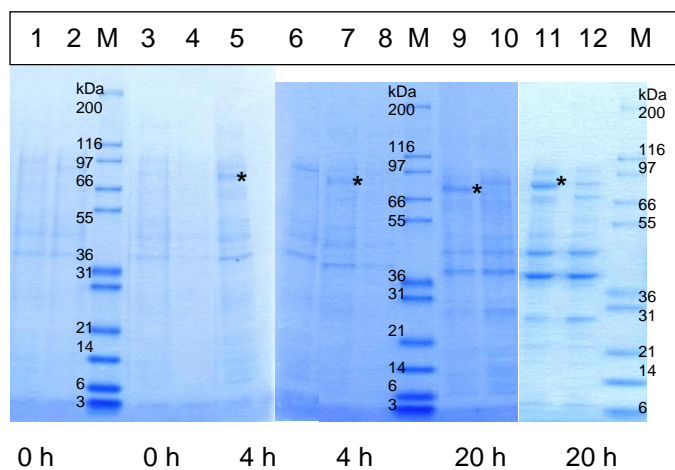

**Fig S4. IPTG-induced *E. coli* transformants growing in LB analysed by SDS-PAGE.** Aliquots (10  $\mu$ L) of the cultures were removed at different time points, incubated 10 min at 80 °C with sample buffer and applied to the gels. Expression product (*PhNah20A*) is indicated by an asterisk. Strains: *E. coli* BL21(DE3) on lanes 1–2 (time of induction 0 h), 5–6 (4 h), 9–10 (20 h) and *E. coli* BL21(DE3) $\Delta$ lacZ 3–4 (0 h), 7–8 (4 h), 11–12 (20 h). M – Mark12 protein standard (Thermo Fisher Scientific, USA); lanes 1, 3, 5, 7, 9, 11 – *PhNah20A*; lanes 2, 4, 6, 8, 12 – *PhNah20B*.

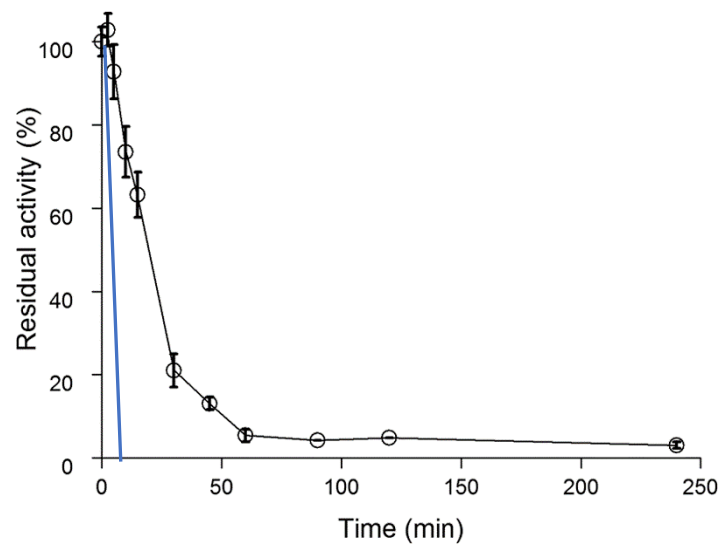

**Fig S5. Inactivation of  $5 \mu\text{g mL}^{-1}$  *PhNah20A* at  $50^\circ\text{C}$  and pH 6.0 in the presence of 0.5% BSA.** The trendline showing the inactivation of *PhNah20A* in the absence of BSA is indicated by the blue line. The initial velocity of *p*NPGLcNAc release remained close to 100% even without BSA if the measurement was started immediately. If the diluted enzyme was incubated 5 min at  $50^\circ\text{C}$  prior the measurement in the absence of BSA, the activity was under the detection limit.

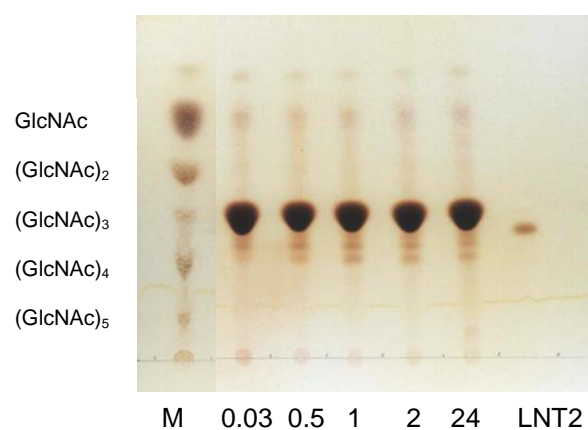

**Fig S6. Time course of transglycosylation by *S. plicatus* Hex (10 U mL<sup>-1</sup>) with 100 mM NAG-oxazoline as donor and 200 mM lactose as acceptor (see Materials and methods for details). Chitooligosaccharides (M) and lacto-*N*-triose II (LNT2) are used as references. The M lane was from the same TLC plate.**

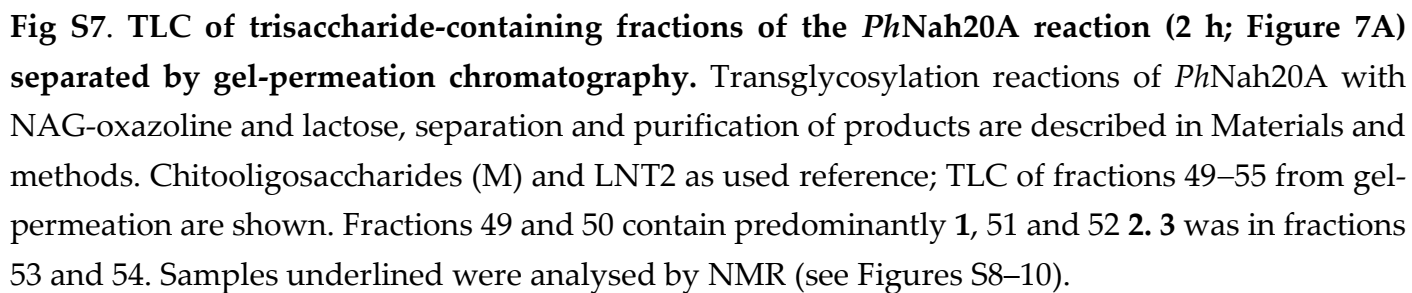

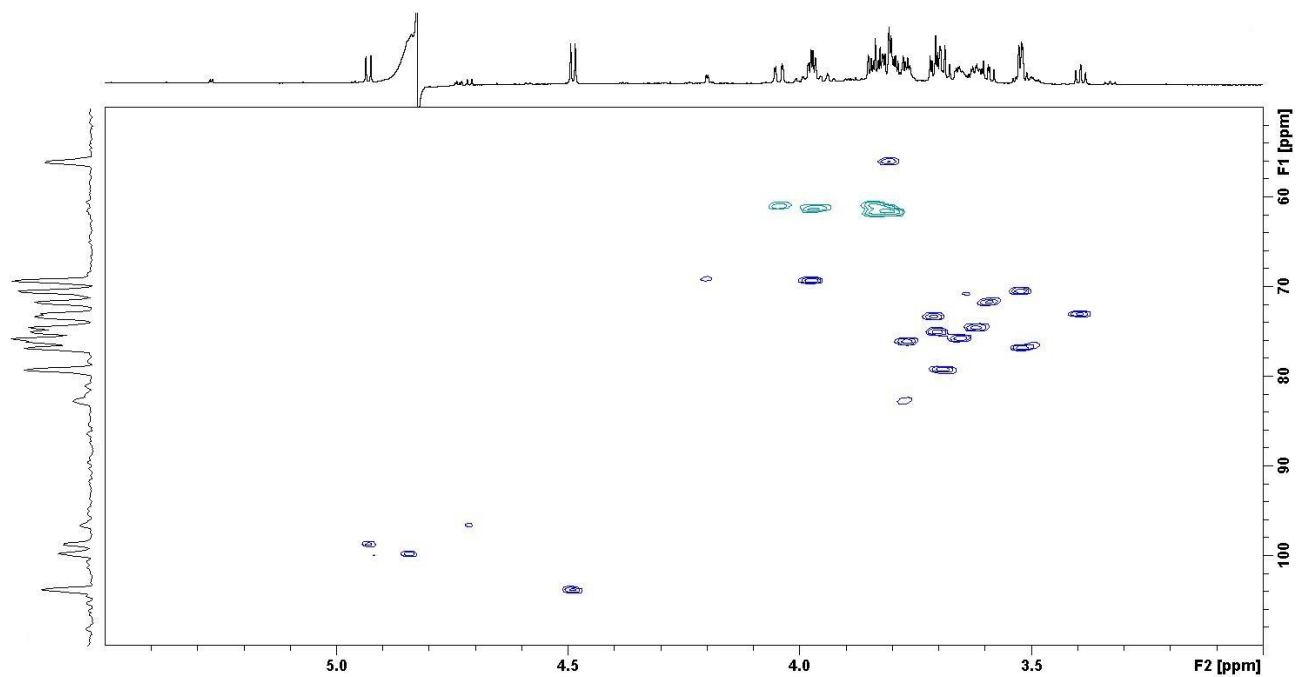

**Fig S8.** HSCQ spectrum of the chromatographic fraction 50 (see Figure S7) containing over 80% of compound **1**. The main contaminant is **2** (LNT2). The  $^1\text{H}$  projection is from a separate experiment.

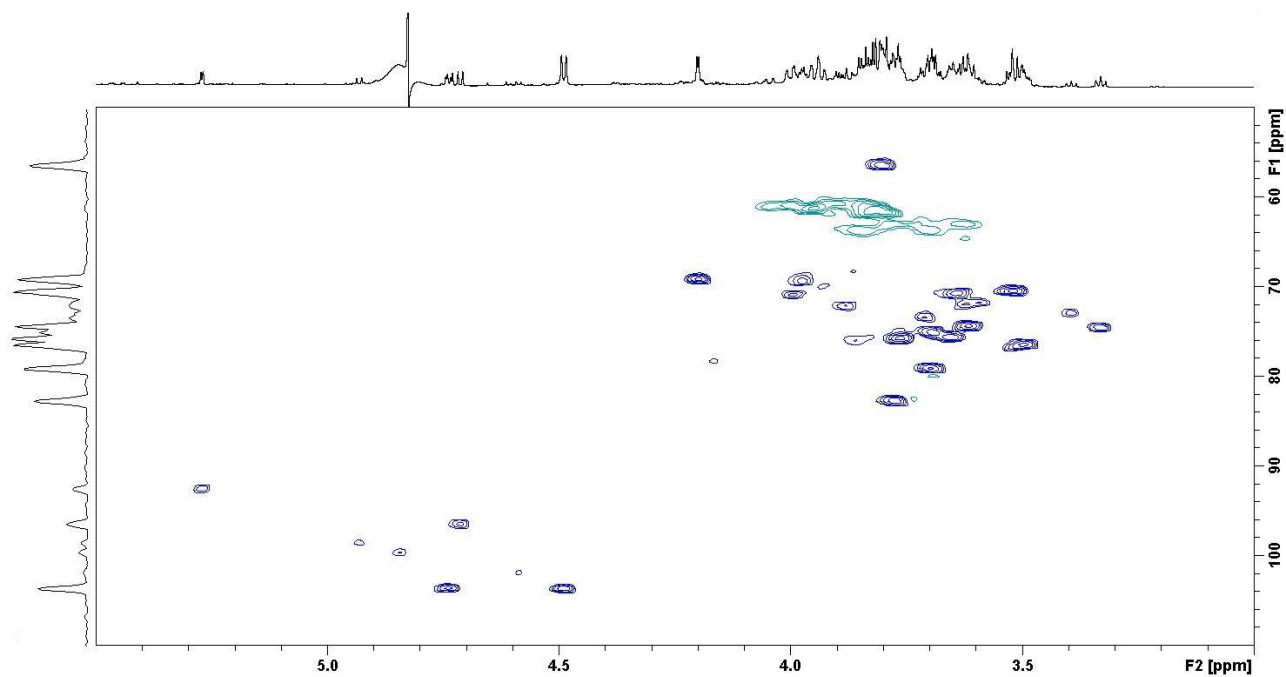

**Fig S9.** HSCQ spectrum of the chromatographic fraction 51 (see Figure S7) containing over 75% of **2** (LNT2). The main contaminant is **1**. The  $^1\text{H}$  projection is from a separate experiment.

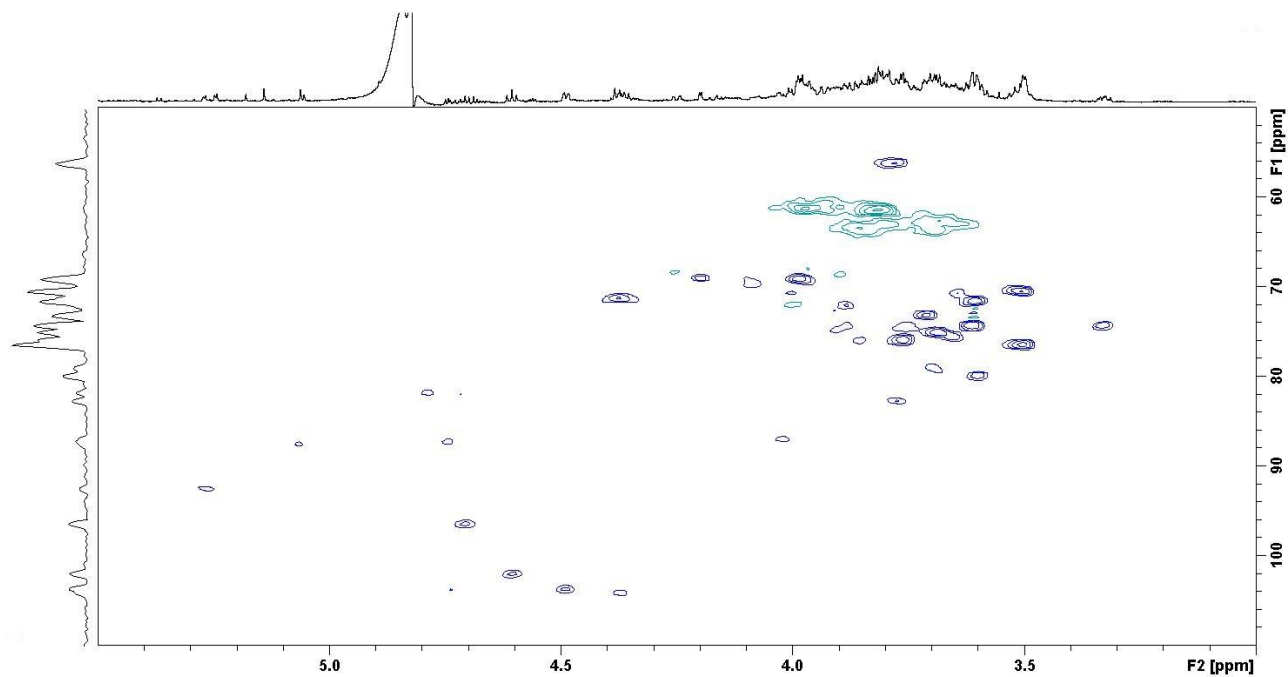

**Fig S10.** HSCQ spectrum of the chromatographic fraction 53 (see Figure S7) containing primarily **3**. The main contaminant is **2** (LNT2). The  $^1\text{H}$  projection is from a separate experiment.

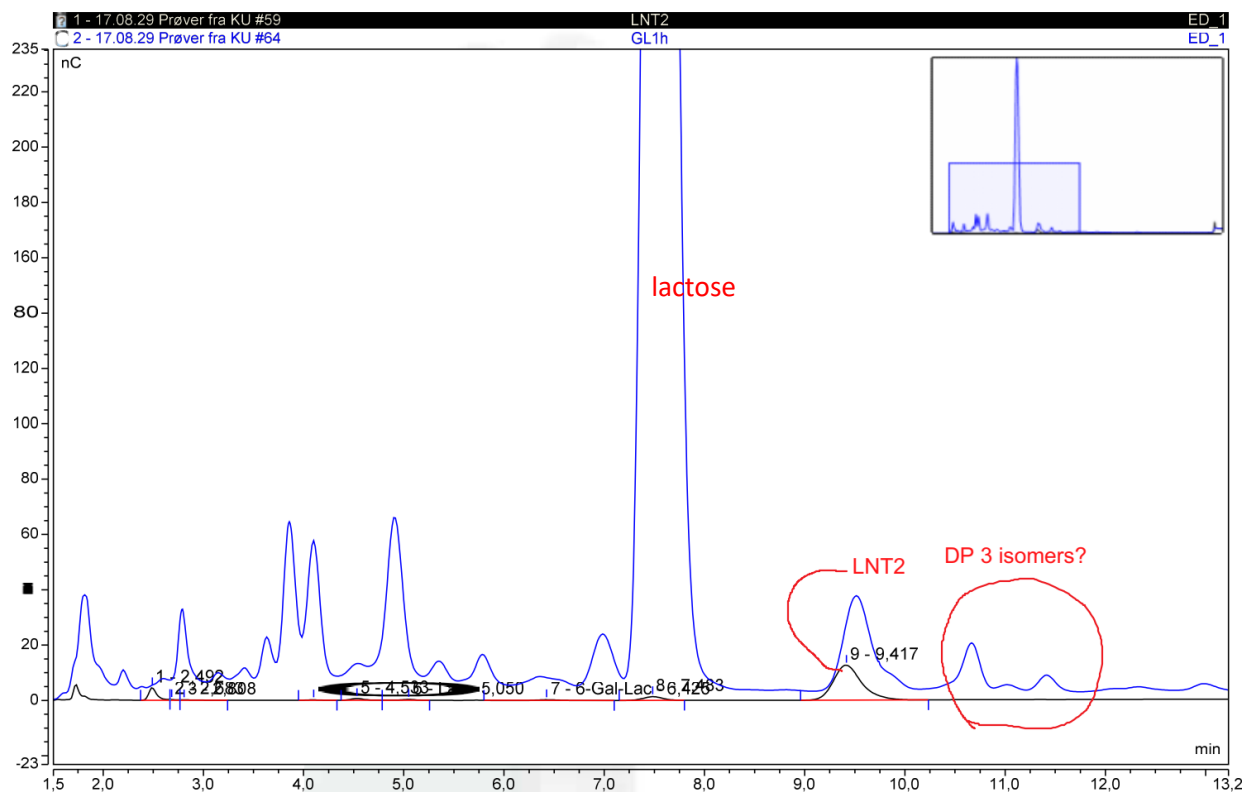

**Fig S11.** Extraction of HPAEC-PAD analysis of transglycosylation products by *PhNah20A* (10 U mL<sup>-1</sup>) reacting 2 h with 100 mM NAG-oxazoline as donor and 200 mM lactose as acceptor (blue line). Lacto-*N*-triose II (LNT2) was used as reference (black line). The full chromatogram is shown in the top right corner.

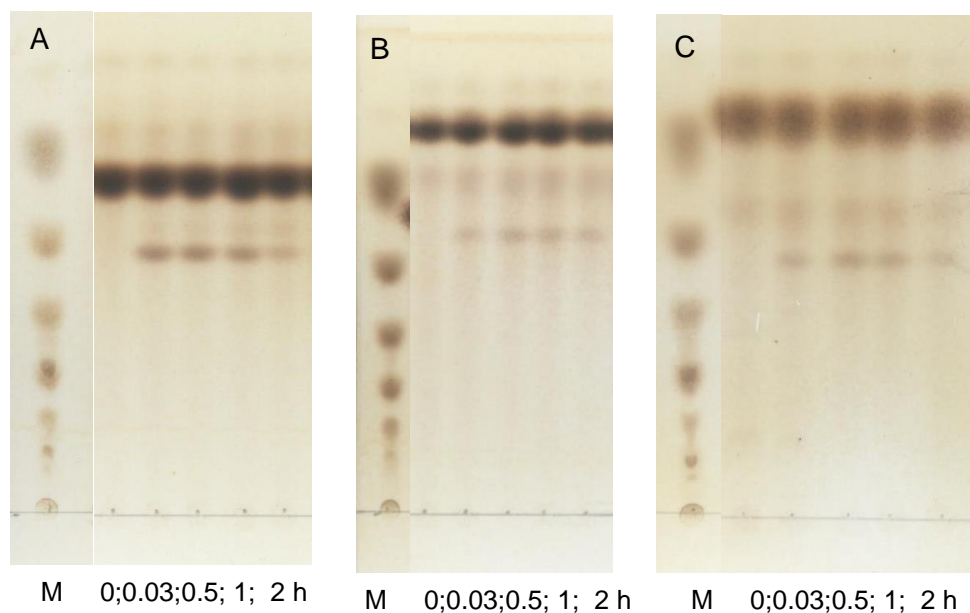

**Fig S12. Time course of transglycosylation by *PhNah20A* (10 U mL<sup>-1</sup>) with 100 mM NAG-oxazoline as donor and 200 mM D-glucose (A), 2-deoxy-D-glucose (B) or L-fucose (C) as acceptor. Chitooligosaccharides of DP 1–6 (M) are used as reference. The reference lane originates from the same TLC plate as samples.**

**Table S1.** BLAST analysis of putative  $\beta$ -NAHAs (EC 3.2.1.52) from *P. hydrolytica*. Protein names, NCBI accession numbers, length, calculated molecular weight and information of protein sequences with the highest identity (including query coverage and E values) based on BLAST analysis are shown.

| Proposed protein name | NCBI accession | GH family | Length (aa) | Calculated Mw (Da) | Proteins of highest identity                                 |                |                |         |              |
|-----------------------|----------------|-----------|-------------|--------------------|--------------------------------------------------------------|----------------|----------------|---------|--------------|
|                       |                |           |             |                    | Name and organism                                            | NCBI accession | Query coverage | E value | Identity (%) |
| PhNah20A              | WP_068373836.1 | GH20      | 807         | 91938              | $\beta$ -NAHA of <i>Lacimicrobium alkaliphilum</i>           | WP_062475767.1 | 96%            | 0.0     | 54           |
|                       |                |           |             |                    | $\beta$ -NAHA of <i>Bowmanella denitrificans</i>             | WP_102795163.1 | 99%            | 0.0     | 53           |
|                       |                |           |             |                    | $\beta$ -NAHA of <i>Lacimicrobium alkaliphilum</i>           | WP_099034787.1 | 97%            | 0.0     | 52           |
|                       |                |           |             |                    | $\beta$ -NAHA of <i>Lacimicrobium</i> sp. SS2-24             | WP_088329680.1 | 97%            | 0.0     | 51           |
|                       |                |           |             |                    | $\beta$ -NAHA of <i>Pseudoalteromonas</i> sp. R3             | WP_082353221.1 | 87%            | 0.0     | 49           |
|                       |                |           |             |                    | $\beta$ -NAHA of <i>Shewanella woodyi</i>                    | WP_012326528.1 | 99%            | 0.0     | 45           |
|                       |                |           |             |                    | $\beta$ -NAHA of <i>Pseudoalteromonas rubra</i>              | WP_125721644.1 | 99%            | 0.0     | 45           |
|                       |                |           |             |                    | hypothetical protein of marine sediment metagenome           | KKL52452.1     | 100%           | 2e-125  | 47           |
|                       |                |           |             |                    | $\beta$ -NAHA of compost metagenome                          | MNG99634.1     | 97%            | 0.0     | 45           |
|                       |                |           |             |                    | $\beta$ -glycoside hydrolase of hydrothermal vent metagenome | VAX26736.1     | 92%            | 1e-97   | 44           |
| PhNah20B              | WP_082768773.1 | GH20      | 879         | 98142              | chitinase of <i>Aliiglaciecola lipolytica</i>                | WP_008846397.1 | 96%            | 0.0     | 49           |
|                       |                |           |             |                    | $\beta$ -NAHA of <i>Bowmanella denitrificans</i>             | WP_146027115.1 | 95%            | 0.0     | 48           |
|                       |                |           |             |                    | $\beta$ -NAHA of <i>Saliniradius amylolyticus</i>            | WP_109339583.1 | 97%            | 0.0     | 48           |
|                       |                |           |             |                    | $\beta$ -NAHA of <i>Shewanella algae</i>                     | WP_145839512.1 | 93%            | 0.0     | 47           |
|                       |                |           |             |                    | $\beta$ -NAHA of <i>Alteromonas pelagimona</i>               | WP_083638293.1 | 98%            | 0.0     | 47           |
|                       |                |           |             |                    | $\beta$ -NAHA of <i>Shewanella halifaxensis</i>              | WP_012276260.1 | 92%            | 0.0     | 47           |
|                       |                |           |             |                    | hypothetical protein of marine metagenome                    | ECV28588.1     | 97%            | 0.0     | 47           |
|                       |                |           |             |                    | hypothetical protein of marine sediment metagenome           | EDA75810.1     | 100%           | 4e-135  | 43           |
|                       |                |           |             |                    | hypothetical protein of marine metagenome                    | KKL70545.1     | 99%            | 4e-168  | 45           |

**Table S2.** Information on proteins flanking identified  $\beta$ -NAHAs (presented in Figure 1B).

| Region              | Number (Fig 1B) | NCBI accession | Predicted function                                            |
|---------------------|-----------------|----------------|---------------------------------------------------------------|
| <i>PhNah20A</i> (3) | 1               | WP_068373829.1 | LemA family protein                                           |
|                     | 2               | WP_068373832.1 | hypothetical protein                                          |
|                     | 4               | WP_068373840.1 | sodium:solute symporter, putative SLC5sbd family protein      |
|                     | 5               | WP_068373843.1 | RidA (reactive intermediate/imine deaminase A) family protein |
|                     | 6               | WP_068373847.1 | D-aminoacylase                                                |
|                     | 7               | WP_068373849.1 | MurR/RpiR family transcriptional regulator                    |
|                     | 8               | WP_068375252.1 | amino acid deaminase                                          |
|                     | 9               | WP_068373852.1 | sodium/proton-translocating pyrophosphatase                   |
| <i>PhNah20B</i> (5) | 1               | WP_068374714.1 | TonB-dependent receptor                                       |
|                     | 2               | WP_068374717.1 | DUF1624 domain-containing protein, putative acyltransferase   |
|                     | 3               | WP_068374723.1 | glucose/galactose MFS transporter                             |
|                     | 4               | WP_068374726.1 | hypothetical protein, putative BadF-type ATPase               |
|                     | 6               | WP_068374732.1 | LacI family DNA-binding transcriptional regulator             |
|                     | 7               | WP_068374734.1 | dCTP deaminase                                                |
|                     | 8               | WP_068374735.1 | iron-sulfur cluster carrier protein ApbC                      |
|                     | 9               | WP_082768774.1 | methionine-tRNA ligase                                        |
|                     | 10              | WP_068374736.1 | TetR/AcrR family transcriptional regulator                    |

**Table S3.** NMR assignment of **1**. The methyl of the GlcNAc acetyl group was at 2.090 ppm for  $^1\text{H}$  and 22.81 ppm for  $^{13}\text{C}$  and the carbonyl of the acetyl was at 176.06 ppm  $^{13}\text{C}$ .

|                         | nuclei          | 1      | 2     | 3     | 4     | 5     | 6         |
|-------------------------|-----------------|--------|-------|-------|-------|-------|-----------|
| $\beta$ -Galp-(1,4-     | $^1\text{H}$    | 4.49   | 3.59  | 3.71  | 3.98  | 3.77  | 3.78/3.85 |
|                         | $^{13}\text{C}$ | 103.77 | 71.70 | 73.36 | 69.29 | 76.16 | 61.81     |
| 4)- $\beta$ -GlcP-(1,1- | $^1\text{H}$    | 4.84   | 3.40  | 3.70  | 3.69  | 3.65  | 3.85/4.05 |
|                         | $^{13}\text{C}$ | 99.82  | 72.98 | 75.01 | 79.21 | 75.78 | 61.02     |
| $\beta$ -GlcPNAc-(1,1-  | $^1\text{H}$    | 4.93   | 3.81  | 3.62  | 3.52  | 3.52  | 3.81/3.97 |
|                         | $^{13}\text{C}$ | 98.80  | 56.06 | 74.50 | 70.43 | 76.79 | 61.40     |

**Table S4.**  $^3\text{H}$ -H coupling constants for **1** measured through DQF-COSY.

|                        | H1-H2 | H2-H3 | H3-H4 | H4-H5 | H5-H6a | H5-H6b | H6a-H6b |
|------------------------|-------|-------|-------|-------|--------|--------|---------|
| $\beta$ -Galp-(1,4     | 8.1   | 10.4  | 3.5   | nd    | nd     | nd     | nd      |
| 4)- $\beta$ -GlcP-(1,1 | 8.4   | 9.4   | nd    | nd    | 7.3    | 2.2    | 12.4    |
| $\beta$ -GlcPNAc-(1,1- | 8.5   | 9.9   | 9.8   | nd    | 8.3    | nd     | 12.5    |

nd – not determined due to a spectral overlap

**Table S5.** PCR primers to isolate full-length  $\beta$ -NAHA encoding genes and indicated truncated variants. Underlined sequences are priming with pURI3-TEV expression vector.

| Protein name    | Variant                        | Primer name           | Primer sequence                                                          |
|-----------------|--------------------------------|-----------------------|--------------------------------------------------------------------------|
| <i>PhNah20A</i> | full-length                    | pURITEVFwG11026       | 5'- <u>GGTGAAAACCTGTATTTCCAGGGC</u> TATAAAATCATTATCGCTGGTCTTGGATTGTTA-3' |
|                 |                                | pURITEVRevG11026      | 5'- <u>AAGCTTAGTTAGCTATTATGCGT</u> ATTAAAGCACGGCATTAAATGCCAAGGCCT-3'     |
|                 | catalytic domain               | pURITEVG11026catalFw  | 5'- <u>GGTGAAAACCTGTATTTCCAGGGC</u> TTGCCTGGCGTGGTTTGTTA-3'              |
|                 |                                | pURITEVRevG11026      | 5'- <u>AAGCTTAGTTAGCTATTATGCGT</u> ATTAAAGCACGGCATTAAATGCCAAGGCCT-3'     |
| <i>PhNah20B</i> | full-length, wo signal peptide | pURITEVFwG11378       | 5'- <u>GGTGAAAACCTGTATTTCCAGGGCGC</u> AGTGGCCGATTCAACGAGTGCT-3'          |
|                 |                                | pURITEVRevG11378      | 5'- <u>AAGCTTAGTTAGCTATTATGCGT</u> ATTACTCCTCCACTTTTGCTGCATTGAGACA-3'    |
|                 | 2 GH20 domains                 | pURITEVG113782domFw   | 5'- <u>GGTGAAAACCTGTATTTCCAGGGCGT</u> GATGTTTGAGCATTACG-3'               |
|                 |                                | pURITEVG11378catalRev | 5'- <u>AAGCTTAGTTAGCTATTATGCGT</u> ATTAAACCAAGCGCGCTCA-3'                |
|                 | catalytic domain               | pURITEVG11378catalFw  | 5'- <u>GGTGAAAACCTGTATTTCCAGGGC</u> TATGAATTCGCGGTTTACAT-3'              |
|                 |                                | pURITEVG11378catalRev | 5'- <u>AAGCTTAGTTAGCTATTATGCGT</u> ATTAAACCAAGCGCGCTCA-3'                |
