# Supplementary material for: Identification and Characterization of a β-N-Acetylhexosaminidase with a Biosynthetic Activity from the Marine Bacterium Paraglaciecola hydrolytica S66T
Source: MDPI journal article supplement (doi:10.3390/ijms21020417), 2020-01-09
Supplement: s1 [file s1]

# Identification and Characterization of a $\beta$ -N-Acetylhexosaminidase with a Biosynthetic Activity from the Marine Bacterium *Paraglaciecola hydrolytica* S66<sup>T</sup>

Triinu Visnapuu <sup>1,2,\*</sup>, David Teze <sup>1</sup>, Christian Kjeldsen <sup>3</sup>, Aleksander Lie <sup>4,a</sup>, Jens Øllgaard Duus <sup>3</sup>, Corinne André-Miral <sup>5</sup>, Lars Haastrup Pedersen <sup>4</sup>, Peter Stougaard <sup>6,b</sup> and Birte Svensson <sup>1,\*</sup>

<sup>1</sup> Department of Biotechnology and Biomedicine, Technical University of Denmark, Søtofts Plads, building 224, DK-2800, Kgs. Lyngby, Denmark; triinu.visnapuu@ut.ee (T.V.); david.teze@gmail.com (D.T.); bis@bio.dtu.dk (B.S.)

<sup>2</sup> Institute of Molecular and Cell Biology, University of Tartu, Riia 23, 51010 Tartu, Estonia

<sup>3</sup> Department of Chemistry, Technical University of Denmark, Kemitorvet, building 207, DK-2800, Kgs. Lyngby, Denmark; chkje@kemi.dtu.dk (C.K.); jduus@kemi.dtu.dk (J.Ø.D.)

<sup>4</sup> Department of Chemistry and Bioscience, Aalborg University, Fredrik Bajers Vej 7, H, DK-9220, Aalborg, Denmark; lhp@bio.aau.dk (L.H.P.); al@kebony.com (A.L.)

<sup>5</sup> Université de Nantes, CNRS, Unité de Fonctionnalité et Ingénierie des Protéines (UFIP), UMR 6286, F-44000 Nantes, France; corinne.miral@univ-nantes.fr (C.A.-M.)

<sup>6</sup> Department of Plant and Environmental Sciences, University of Copenhagen, Thorvaldsensvej 40, DK-1871, Frederiksberg C, Denmark; pst@envs.au.dk (P.S.)

\* Correspondence: triinu.visnapuu@ut.ee; Tel.: +372-737-5013 (T.V.); bis@bio.dtu.dk; Tel.: +45-4525-2740 (B.S.)

<sup>a</sup> Present affiliation: Kebony Norge AS, Havneveien 35, NO-3739, Skien, Norway

<sup>b</sup> Present affiliation: Department of Environmental Science - Environmental Microbiology and Circular Resource Flow, Aarhus University, Frederiksborgvej 399, building 7411, B2.12, DK-4000, Roskilde, Denmark



|                                | 80                                                                     | 90 | 100 | 110 | 120 | 130 | 140 |     |
|--------------------------------|------------------------------------------------------------------------|----|-----|-----|-----|-----|-----|-----|
| WP_082768773.1_Nah20B_P. hydro | ..... ..... ..... ..... ..... ..... ..... ..... ..... .....            |    |     |     |     |     |     | 1   |
| WP_068373836.1_Nah20A_P. hydro | -----                                                                  |    |     |     |     |     |     | 1   |
| BAD00143.1_Nah20A_A. hydrophil | -----                                                                  |    |     |     |     |     |     | 1   |
| BAF76001.1_NahB_A. hydrophila  | -----                                                                  |    |     |     |     |     |     | 1   |
| BAI94822.1_BbhI_B. bifidum     | QNKAANEWIEVGLGGTKTVKQINIDFERKDADQNITSFKVELKQGDYTKVYQKDTRAKQQEIILLDQAO  |    |     |     |     |     |     | 140 |
| AAQ05800.1_Hex20A_C. fimi      | -----                                                                  |    |     |     |     |     |     | 1   |
| BAI63641.1_Hex1t_Paenibacillus | -----                                                                  |    |     |     |     |     |     | 1   |
| CAA55582.1_NahA_P. gingivalis  | -----                                                                  |    |     |     |     |     |     | 1   |
| BAA84281.1_Hex99_P. piscicida  | -----                                                                  |    |     |     |     |     |     | 1   |
| BAB84321.1_Hex86_P. piscicida  | -----                                                                  |    |     |     |     |     |     | 1   |
| AAB03808.1_Chb_S. marcescens   | -----                                                                  |    |     |     |     |     |     | 1   |
| AAS02154.1_GcnA_S. gordonii    | -----                                                                  |    |     |     |     |     |     | 1   |
| AAK98861.1_StrH_S. pneumoniae  | AELQPEAPKTVETETPATDKVASLPKTEEKQEEVSSTPSDKAEVVTPTSAREKETANKKEEEASPKKEEA |    |     |     |     |     |     | 137 |
| CAB87223.1_HexA_S. coelicolor  | -----                                                                  |    |     |     |     |     |     | 1   |
| AAC38798.3_SpHex_S. plicatus   | -----                                                                  |    |     |     |     |     |     | 1   |
| AKC34128.1_Hex1_uncultured Act | -----                                                                  |    |     |     |     |     |     | 1   |
| AKC34129.1_Hex2_uncultured Bac | -----                                                                  |    |     |     |     |     |     | 1   |
| AAC44672.1_ExoI_V. furnissii   | -----                                                                  |    |     |     |     |     |     | 1   |
| AAA88682.1_Chb_V. harveyi      | -----                                                                  |    |     |     |     |     |     | 1   |
| AAD30612.1_AtHex1_A. thaliana  | -----                                                                  |    |     |     |     |     |     | 1   |
| AAM91092.1_AtHex3_A. thaliana  | -----                                                                  |    |     |     |     |     |     | 1   |
| BAE99290.1_AtHex3_A. thaliana  | -----                                                                  |    |     |     |     |     |     | 1   |
| AAM13977.1_HexA_A. oryzae      | -----                                                                  |    |     |     |     |     |     | 1   |
| AAT99455.1_BmGlcNAcase3_B. mor | -----                                                                  |    |     |     |     |     |     | 1   |
| AAC60521.1_BmChiGlcNAcase_B. m | -----                                                                  |    |     |     |     |     |     | 1   |
| CCD73477.2_CeHEX-4_C. elegans  | -----                                                                  |    |     |     |     |     |     | 1   |
| AAA34346.2_Hex1_C. albicans    | -----                                                                  |    |     |     |     |     |     | 1   |
| ADU20405.1_βHex_C. annuum      | -----                                                                  |    |     |     |     |     |     | 1   |
| ABB18373.1_CpHEX1_C. posadasii | -----                                                                  |    |     |     |     |     |     | 1   |
| AAA33230.1_NagA_D. discoideum  | -----                                                                  |    |     |     |     |     |     | 1   |
| AAF46406.1_Hex2_D. melanogaste | -----                                                                  |    |     |     |     |     |     | 1   |
| AAF47881.1_Hex1_D. melanogaste | -----                                                                  |    |     |     |     |     |     | 1   |
| AAM29423.1_Fdl_D. melanogaster | -----                                                                  |    |     |     |     |     |     | 1   |
| CAE46968.1_HexA_E. histolytica | -----                                                                  |    |     |     |     |     |     | 1   |
| AAB00965.1_HexA_H. sapiens     | -----                                                                  |    |     |     |     |     |     | 1   |
| AAA52645.1_HexB_H. sapiens     | -----                                                                  |    |     |     |     |     |     | 1   |
| AAC53246.1_HexA_M. musculus    | -----                                                                  |    |     |     |     |     |     | 1   |
| AAA18776.1_HexB_M. musculus    | -----                                                                  |    |     |     |     |     |     | 1   |
| ABI81756.1_Hex1_O. furnacalis  | -----                                                                  |    |     |     |     |     |     | 1   |
| AEQ33603.1_HexTF_T. flavus     | -----                                                                  |    |     |     |     |     |     | 1   |
| ACI15900.1_NagA_T. maritima    | -----                                                                  |    |     |     |     |     |     | 1   |
| AAK16587.1_CbsA_T. neapolitana | -----                                                                  |    |     |     |     |     |     | 1   |
| CAA63123.1_HexB_S. scrofa      | -----                                                                  |    |     |     |     |     |     | 1   |

|                                |                                                                         |                                               |     |     |     |     |     |     |
|--------------------------------|-------------------------------------------------------------------------|-----------------------------------------------|-----|-----|-----|-----|-----|-----|
|                                | 150                                                                     | 160                                           | 170 | 180 | 190 | 200 | 210 |     |
|                                | ..... ..... ..... ..... ..... ..... ..... .....                         |                                               |     |     |     |     |     |     |
| WP_082768773.1_Nah20B_P. hydro | -----                                                                   | MKGNNMGNTRRKFTLGSFCGLASLLCSSGSLSAAVADSTSAQQQL |     |     |     |     |     | 44  |
| WP_068373836.1_Nah20A_P. hydro | -----                                                                   |                                               |     |     |     |     |     | 1   |
| BAD00143.1_Nah20A_A. hydrophil | -----                                                                   | MNLKHSLLAIAMSTVFAGPALAADAAARQAVVDAL           |     |     |     |     |     | 34  |
| BAF76001.1_NahB_A. hydrophila  | -----                                                                   | MSAPLIHTRVDHRD                                |     |     |     |     |     | 14  |
| BAI94822.1_BbhI_B. bifidum     | QASAVKVTVLSADGGTMNWWNVGINEISVYSAPKETVLDTADTNHMLGATMTASSNETATLTDPKAIDQN  |                                               |     |     |     |     |     | 210 |
| AAQ05800.1_Hex20A_C. fimi      | -----                                                                   |                                               |     |     |     |     |     | 1   |
| BAI63641.1_HexIt_Paenibacillus | -----                                                                   |                                               |     |     |     |     |     | 1   |
| CAA55582.1_NahA_P. gingivalis  | -----                                                                   |                                               |     |     |     |     |     | 1   |
| BAA84281.1_Hex99_P. piscicida  | -----                                                                   | MFAKKQIIITASLSGLALLTASHYFAPHPDNLALR           |     |     |     |     |     | 36  |
| BAB84321.1_Hex86_P. piscicida  | -----                                                                   |                                               |     |     |     |     |     | 1   |
| AAB03808.1_Chb_S. marcescens   | -----                                                                   | MNAFKLSALARLTATMGFLGGMGSAMADQQLVDQL           |     |     |     |     |     | 35  |
| AAS02154.1_GcnA_S. gordonii    | -----                                                                   |                                               |     |     |     |     |     | 1   |
| AAK98861.1_StrH_S. pneumoniae  | KEVDSKESNTDKTDKDKPAKKDEAKAEADKPETETGKERAA TVNEKLAKKKIVSIDAGRKYFSPEQLKEI |                                               |     |     |     |     |     | 207 |
| CAB87223.1_HexA_S. coelicolor  | -----                                                                   |                                               |     |     |     |     |     | 1   |
| AAC38798.3_SpHex_S. plicatus   | -----                                                                   |                                               |     |     |     |     |     | 1   |
| AKC34128.1_Hex1_uncultured Act | -----                                                                   |                                               |     |     |     |     |     | 1   |
| AKC34129.1_Hex2_uncultured Bac | -----                                                                   |                                               |     |     |     |     |     | 1   |
| AAC44672.1_ExoI_V. furnissii   | -----                                                                   | MNYRIDFAVLSEH                                 |     |     |     |     |     | 13  |
| AAA88682.1_Chb_V. harveyi      | -----                                                                   | MLKHSLIAASVITT-LAGCSSLOSSEQOVNSL              |     |     |     |     |     | 32  |
| AAD30612.1_AtHex1_A. thaliana  | -----                                                                   |                                               |     |     |     |     |     | 1   |
| AAM91092.1_AtHex3_A. thaliana  | -----                                                                   |                                               |     |     |     |     |     | 1   |
| BAE99290.1_AtHex3_A. thaliana  | -----                                                                   |                                               |     |     |     |     |     | 1   |
| AAM13977.1_HexA_A. oryzae      | -----                                                                   |                                               |     |     |     |     |     | 1   |
| AAT99455.1_BmGlcNAcase3_B. mor | -----                                                                   |                                               |     |     |     |     |     | 1   |
| AAC60521.1_BmChiGlcNAcase_B. m | -----                                                                   |                                               |     |     |     |     |     | 1   |
| CCD73477.2_CeHEX-4_C. elegans  | -----                                                                   |                                               |     |     |     |     |     | 1   |
| AAA34346.2_Hex1_C. albicans    | -----                                                                   |                                               |     |     |     |     |     | 1   |
| ADU20405.1_betaHex_C. annum    | -----                                                                   |                                               |     |     |     |     |     | 1   |
| ABB18373.1_CpHEX1_C. posadasii | -----                                                                   |                                               |     |     |     |     |     | 1   |
| AAA33230.1_NagA_D. discoideum  | -----                                                                   |                                               |     |     |     |     |     | 1   |
| AAF46406.1_Hex2_D. melanogaste | -----                                                                   |                                               |     |     |     |     |     | 1   |
| AAF47881.1_Hex1_D. melanogaste | -----                                                                   |                                               |     |     |     |     |     | 1   |
| AAM29423.1_Fdl_D. melanogaster | -----                                                                   |                                               |     |     |     |     |     | 1   |
| CAE46968.1_HexA_E. histolytica | -----                                                                   |                                               |     |     |     |     |     | 1   |
| AAB00965.1_HexA_H. sapiens     | -----                                                                   |                                               |     |     |     |     |     | 1   |
| AAA52645.1_HexB_H. sapiens     | -----                                                                   |                                               |     |     |     |     |     | 1   |
| AAC53246.1_HexA_M. musculus    | -----                                                                   |                                               |     |     |     |     |     | 1   |
| AAA18776.1_HexB_M. musculus    | -----                                                                   |                                               |     |     |     |     |     | 1   |
| ABI81756.1_Hex1_O. furnacalis  | -----                                                                   |                                               |     |     |     |     |     | 1   |
| AEQ33603.1_HexTF_T. flavus     | -----                                                                   |                                               |     |     |     |     |     | 1   |
| ACI15900.1_NagA_T. maritima    | -----                                                                   |                                               |     |     |     |     |     | 1   |
| AAK16587.1_CbsA_T. neapolitana | -----                                                                   |                                               |     |     |     |     |     | 1   |
| CAA63123.1_HexB_S. scrofa      | -----                                                                   |                                               |     |     |     |     |     | 1   |

|                                | 220                            | 230                            | 240                            | 250                            | 260                            | 270                            | 280                            |
|--------------------------------|--------------------------------|--------------------------------|--------------------------------|--------------------------------|--------------------------------|--------------------------------|--------------------------------|
| WP_082768773.1_Nah20B_P. hydro | LDNIAAHMGLTYVINNNISVENCQ       | QDDTGS                         | AQCYQGQIQ                      | LTFFK-QD                       | VALKDWQI                       | YFSNTS                         | NIKWGDGSE                      |
| WP_068373836.1_Nah20A_P. hydro | ASNLVVKYEVV                    | TNDGAGAGLDC                    | QALGSEWAS                      | CGVAKLHL                       | TNTGADV                        | TSKDWSI                        | YVSSIRRIQ                      |
| BAD00143.1_Nah20A_A. hydrophil | GDDVWFRFTLS                    | QLP-----                       | AAPWKLH                        | FCLARQID                       | PHSIEGGS                       |                                |                                |
| BAF76001.1_NahB_A. hydrophila  | RTGRNNRWAS                     | GYETPSNI                       | WLKAEFPRL                      | TAVKDIRI                       | YFFERDV                        | NPKPTNV                        | QSFDLSY                        |
| BAI94822.1_BbhI_B. bifidum     | AAQ05800.1_Hex20A_C. fimi      | CAA63641.1_Hex1t_Paenibacillus | CAA55582.1_NahA_P. gingivalis  | BAA84281.1_Hex99_P. piscicida  | BAB84321.1_Hex86_P. piscicida  | AAB03808.1_Chb_S. marcescens   | AAS02154.1_GcnA_S. gordonii    |
| AAQ05800.1_Hex20A_C. fimi      | CAA63641.1_Hex1t_Paenibacillus | CAA55582.1_NahA_P. gingivalis  | BAA84281.1_Hex99_P. piscicida  | BAB84321.1_Hex86_P. piscicida  | AAB03808.1_Chb_S. marcescens   | AAS02154.1_GcnA_S. gordonii    | AAK98861.1_StrH_S. pneumoniae  |
| BAI63641.1_Hex1t_Paenibacillus | CAA55582.1_NahA_P. gingivalis  | BAA84281.1_Hex99_P. piscicida  | BAB84321.1_Hex86_P. piscicida  | AAB03808.1_Chb_S. marcescens   | AAS02154.1_GcnA_S. gordonii    | AAK98861.1_StrH_S. pneumoniae  | CAB87223.1_HexA_S. coelicolor  |
| CAA55582.1_NahA_P. gingivalis  | BAA84281.1_Hex99_P. piscicida  | BAB84321.1_Hex86_P. piscicida  | AAB03808.1_Chb_S. marcescens   | AAS02154.1_GcnA_S. gordonii    | AAK98861.1_StrH_S. pneumoniae  | CAB87223.1_HexA_S. coelicolor  | AAC38798.3_SpHex_S. plicatus   |
| BAA84281.1_Hex99_P. piscicida  | BAB84321.1_Hex86_P. piscicida  | AAB03808.1_Chb_S. marcescens   | AAS02154.1_GcnA_S. gordonii    | AAK98861.1_StrH_S. pneumoniae  | CAB87223.1_HexA_S. coelicolor  | AAC38798.3_SpHex_S. plicatus   | AKC34128.1_Hex1_uncultured Act |
| BAB84321.1_Hex86_P. piscicida  | AAB03808.1_Chb_S. marcescens   | AAS02154.1_GcnA_S. gordonii    | AAK98861.1_StrH_S. pneumoniae  | CAB87223.1_HexA_S. coelicolor  | AAC38798.3_SpHex_S. plicatus   | AKC34128.1_Hex1_uncultured Act | AKC34129.1_Hex2_uncultured Bac |
| AAB03808.1_Chb_S. marcescens   | AAS02154.1_GcnA_S. gordonii    | AAK98861.1_StrH_S. pneumoniae  | CAB87223.1_HexA_S. coelicolor  | AAC38798.3_SpHex_S. plicatus   | AKC34128.1_Hex1_uncultured Act | AKC34129.1_Hex2_uncultured Bac | AAC44672.1_ExoI_V. furnissii   |
| AAS02154.1_GcnA_S. gordonii    | AAK98861.1_StrH_S. pneumoniae  | CAB87223.1_HexA_S. coelicolor  | AAC38798.3_SpHex_S. plicatus   | AKC34128.1_Hex1_uncultured Act | AKC34129.1_Hex2_uncultured Bac | AAC44672.1_ExoI_V. furnissii   | AAA88682.1_Chb_V. harveyi      |
| AAK98861.1_StrH_S. pneumoniae  | CAB87223.1_HexA_S. coelicolor  | AAC38798.3_SpHex_S. plicatus   | AKC34128.1_Hex1_uncultured Act | AKC34129.1_Hex2_uncultured Bac | AAC44672.1_ExoI_V. furnissii   | AAA88682.1_Chb_V. harveyi      | AAD30612.1_AtHex1_A. thaliana  |
| CAB87223.1_HexA_S. coelicolor  | AAC38798.3_SpHex_S. plicatus   | AKC34128.1_Hex1_uncultured Act | AKC34129.1_Hex2_uncultured Bac | AAC44672.1_ExoI_V. furnissii   | AAA88682.1_Chb_V. harveyi      | AAD30612.1_AtHex1_A. thaliana  | AAM91092.1_AtHex3_A. thaliana  |
| AAC38798.3_SpHex_S. plicatus   | AKC34128.1_Hex1_uncultured Act | AKC34129.1_Hex2_uncultured Bac | AAC44672.1_ExoI_V. furnissii   | AAA88682.1_Chb_V. harveyi      | AAD30612.1_AtHex1_A. thaliana  | AAM91092.1_AtHex3_A. thaliana  | BAE99290.1_AtHex3_A. thaliana  |
| AKC34128.1_Hex1_uncultured Act | AKC34129.1_Hex2_uncultured Bac | AAC44672.1_ExoI_V. furnissii   | AAA88682.1_Chb_V. harveyi      | AAD30612.1_AtHex1_A. thaliana  | AAM91092.1_AtHex3_A. thaliana  | BAE99290.1_AtHex3_A. thaliana  | AAM13977.1_HexA_A. oryzae      |
| AKC34129.1_Hex2_uncultured Bac | AAC44672.1_ExoI_V. furnissii   | AAA88682.1_Chb_V. harveyi      | AAD30612.1_AtHex1_A. thaliana  | AAM91092.1_AtHex3_A. thaliana  | BAE99290.1_AtHex3_A. thaliana  | AAM13977.1_HexA_A. oryzae      | AAT99455.1_BmGlcNAcase3_B. mor |
| AAC44672.1_ExoI_V. furnissii   | AAA88682.1_Chb_V. harveyi      | AAD30612.1_AtHex1_A. thaliana  | AAM91092.1_AtHex3_A. thaliana  | BAE99290.1_AtHex3_A. thaliana  | AAM13977.1_HexA_A. oryzae      | AAT99455.1_BmGlcNAcase3_B. mor | AAC60521.1_BmChiGlcNAcase_B. m |
| AAA88682.1_Chb_V. harveyi      | AAD30612.1_AtHex1_A. thaliana  | AAM91092.1_AtHex3_A. thaliana  | BAE99290.1_AtHex3_A. thaliana  | AAM13977.1_HexA_A. oryzae      | AAT99455.1_BmGlcNAcase3_B. mor | AAC60521.1_BmChiGlcNAcase_B. m | CCD73477.2_CeHEX-4_C. elegans  |
| AAD30612.1_AtHex1_A. thaliana  | AAM91092.1_AtHex3_A. thaliana  | BAE99290.1_AtHex3_A. thaliana  | AAM13977.1_HexA_A. oryzae      | AAT99455.1_BmGlcNAcase3_B. mor | AAC60521.1_BmChiGlcNAcase_B. m | CCD73477.2_CeHEX-4_C. elegans  | AAA34346.2_Hex1_C. albicans    |
| AAM91092.1_AtHex3_A. thaliana  | BAE99290.1_AtHex3_A. thaliana  | AAM13977.1_HexA_A. oryzae      | AAT99455.1_BmGlcNAcase3_B. mor | AAC60521.1_BmChiGlcNAcase_B. m | CCD73477.2_CeHEX-4_C. elegans  | AAA34346.2_Hex1_C. albicans    | ADU20405.1_βHex_C. annum       |
| BAE99290.1_AtHex3_A. thaliana  | AAM13977.1_HexA_A. oryzae      | AAT99455.1_BmGlcNAcase3_B. mor | AAC60521.1_BmChiGlcNAcase_B. m | CCD73477.2_CeHEX-4_C. elegans  | AAA34346.2_Hex1_C. albicans    | ADU20405.1_βHex_C. annum       | ABB18373.1_CpHEX1_C. posadasii |
| AAM13977.1_HexA_A. oryzae      | AAT99455.1_BmGlcNAcase3_B. mor | AAC60521.1_BmChiGlcNAcase_B. m | CCD73477.2_CeHEX-4_C. elegans  | AAA34346.2_Hex1_C. albicans    | ADU20405.1_βHex_C. annum       | ABB18373.1_CpHEX1_C. posadasii | AAA33230.1_NagA_D. discoideum  |
| AAT99455.1_BmGlcNAcase3_B. mor | AAC60521.1_BmChiGlcNAcase      |                                |                                |                                |                                |                                |                                |

|                                | 290                                             | 300                                                                     | 310 | 320 | 330 | 340 | 350 |  |
|--------------------------------|-------------------------------------------------|-------------------------------------------------------------------------|-----|-----|-----|-----|-----|--|
| WP_082768773.1_Nah20B_P. hydro | ..... ..... ..... ..... ..... ..... ..... ..... | IQHTNGDIHVITPVS--QNLIKKGSYAIDFKGIGSLVNESEAFPNYFISATDLQARVIQMTVPLVDSDTQ  | 181 |     |     |     |     |  |
| WP_068373836.1_Nah20A_P. hydro | ----- ----- ----- ----- ----- ----- ----- ----- | -----MYKIIIIAGLGLWSITSHGMQPLNLMPPSEVQQQAGHFTLPSQLKVFTQH----             | 51  |     |     |     |     |  |
| BAD00143.1_Nah20A_A. hydrophil |                                                 | ITHLTGDLRLTPTEKFQGFADATVEVPLVVEYVWLFESDIMPWYVASEGAEPKVLASMSNIDDASTY     | 174 |     |     |     |     |  |
| BAF76001.1_NahB_A. hydrophila  |                                                 | LERQSGSYKVMVPHEGVVS--ELRFCCRN-----TFLKHSDMPKGFFLSLESKGQLQPLVLKGEDLGLT   | 113 |     |     |     |     |  |
| BAI94822.1_BbhI_B. bifidum     |                                                 | AMTASGAGYVADVVIQLDQAVNARSILKLSNFAIKSSEYNNVSVAEWEAYSNDQAEFGATLDSVVDLESN  | 350 |     |     |     |     |  |
| AAQ05800.1_Hex20A_C. fimi      |                                                 | -----MPDVAVIERPVLLETTDGPFFVLTAAATILVVDSS--                              | 33  |     |     |     |     |  |
| BAI63641.1_Hex1t_Paenibacillus |                                                 | -----MMSFIP---ESASASTSQPSILPKVPVSYTVG-SGQFVLTKNASIFVAGNNV               | 47  |     |     |     |     |  |
| CAA55582.1_NahA_P. gingivalis  |                                                 | ---MKRLTFGACICCLLSLMACSQKAKQVQIPEYDKGINIIPLMQLTES-DDSFEVDDKTTICVS----   | 62  |     |     |     |     |  |
| BAA84281.1_Hex99_P. piscicida  |                                                 | DDAKSGDYFVLKPVAGFAPIQPGESRTIEIVAQYWQLKNDSPSGFHHISYNNQAPQAVLVDVMMDPSPDPK | 176 |     |     |     |     |  |
| BAB84321.1_Hex86_P. piscicida  |                                                 | ---MN-----QSVFYTFQLQSSLLLSLLFTPLCTALQITKPLSASFG-NGHFNLTHTDSKITFN----    | 55  |     |     |     |     |  |
| AAB03808.1_Chb_S. marcescens   |                                                 | IAHLTGDLKLEPTAKFSGFPAGKAVEIPVVAEYWLFRNDFLPRWYATSGDAKPKMLANTD-TENLDQF    | 173 |     |     |     |     |  |
| AAS02154.1_GcnA_S. gordonii    |                                                 | ATFLGLSSKQEKALVRLDKYLNLEIAVSLVTDTSATSIKVEGRQGYQVSYKQPHQLYRALALLSAAALRS  | 71  |     |     |     |     |  |
| AAK98861.1_StrH_S. pneumoniae  |                                                 | INYAKDKGIGLIPTVNSPGHMDAILNAMKELGIQNPNSFYFGKKSARTVLDNEQAVAFTKALIDKYAAY   | 347 |     |     |     |     |  |
| CAB87223.1_HexA_S. coelicolor  |                                                 | TPRITRLLGSLLLVAAGVAMTTGAAPVRKAAAEPTPLDRVIPAPASVDPG-GAPYRITRGTHIRVD----  | 75  |     |     |     |     |  |
| AAC38798.3_SpHex_S. plicatus   |                                                 | -----MTTGAAPDRKAPVRPTPLDRVIPAPASVDPG-GAPYRITRGTHIRVD----                | 46  |     |     |     |     |  |
| AKC34128.1_Hex1_uncultured Act |                                                 | -----MSP-----VMNTVIPRPSSVLGT-GRSFELPADARILVQP---                        | 34  |     |     |     |     |  |
| AKC34129.1_Hex2_uncultured Bac |                                                 | ---MK-----TIASLLIAGSLATSAAEPP-----ALIPQPVSVQPG-EGSFKFSAGTGIRH----       | 47  |     |     |     |     |  |
| AAC44672.1_ExoI_V. furnissii   |                                                 | QIHQVGSFCSLTPEQDVINSNSHFYCEFSIKTAPFFHYTDTGIIKAAAFVQINDVEPRVRHDTVITPIALA | 122 |     |     |     |     |  |
| AAA88682.1_Chb_V. harveyi      |                                                 | ISRVTGDLHKLEPTDKFDGFAAGEEVVLPVGEYWLFFETDFMFGAFVSAPNAEPKMIASLN-TEDVASF   | 171 |     |     |     |     |  |
| AAD30612.1_AtHex1_A. thaliana  |                                                 | -----MLTSLKFHVILIPILFFITLLSPLFSIALPINIWPCKPR----FLSWPQHKAIALSPNFT----   | 55  |     |     |     |     |  |
| AAM91092.1_AtHex3_A. thaliana  |                                                 | -----MRGSGAKIAGVLPFLFMIAGTISAFEDIER-LRIWPLPAQVSHGGRMYLSGDFKLVTGSK--     | 62  |     |     |     |     |  |
| BAE99290.1_AtHex3_A. thaliana  |                                                 | -----MSTNLLRLILLFITLSITSSLSTPSPADSPPYLWPLPAEFSFGNETLSVDPTVTTLIVAGN--    | 60  |     |     |     |     |  |
| AAM13977.1_HexA_A. oryzae      |                                                 | -----MRISQICTVLSTVTS--AVAVGVNPLPAPR-----EISWGSSGPKSIAGELQ----           | 45  |     |     |     |     |  |
| AAT99455.1_BmGlcNAcase3_B. mor |                                                 | -----MFERLFVYLNILGAFVLVTGLHIVEPGPEYPASKGAIWPRPQMOSIEIPYKYFSDILEIKVVDHDC | 65  |     |     |     |     |  |
| AAC60521.1_BmChiGlcNAcase_B. m |                                                 | E-----NNRCKTIRNEPENKEPVLSEACKMFC-DYGLLWPKPT-IETNLGNFLSKINMNTIDIQ----    | 92  |     |     |     |     |  |
| CCD73477.2_CeHEX-4_C. elegans  |                                                 | -----MHKMSKLCFLALLSVTFMLIFVLTTTPYSNDRSSYAAYEGGIDPRKTRQFKNIIVHLDLKG----  | 60  |     |     |     |     |  |
| AAA34346.2_Hex1_C. albicans    |                                                 | -----MVLDKMIIFHLLWLNCNVVHAAKVEILPAPQ-----SVTWENDTAIIINPRLL----          | 49  |     |     |     |     |  |
| ADU20405.1_βHex_C. annum       |                                                 | -----MRGDTTFPFILS---LFVIFITQTIATNYPINVPKPT----TFNWPNPKIHLPLPNFT----     | 52  |     |     |     |     |  |
| ABB18373.1_CpHEX1_C. posadasii |                                                 | -----MRFAYLATLAGSLLAGLAQAVKVNPLPAPQ----HIKWGESGPQYLDWNVK----            | 47  |     |     |     |     |  |
| AAA33230.1_NagA_D. discoideum  |                                                 | -----MIKKIILFFAVLIA--IVIGQQPLNVVPYPPQVVSIGTCVIPVAPGSILIESN----          | 50  |     |     |     |     |  |
| AAF46406.1_Hex2_D. melanogaste |                                                 | SRTDICTAEGEMVAGLQYAPEIFESQRDCRLSCG-KYGAIWPMPTGKECTISHRRVRFPWKVRFH----   | 119 |     |     |     |     |  |
| AAF47881.1_Hex1_D. melanogaste |                                                 | R-----SGYCQKVELSEENYVKAISLPVCRLFCGSSIGTLWPKPT-GTVRLDTLMRQVDISFIDFN----  | 94  |     |     |     |     |  |
| AAM29423.1_Fdl_D. melanogaster |                                                 | E-----NDRCMRVGHGKS-AKRVSFISCSMTG--DVNIWPHPT-QKFLSSQTHSFSVEDVQLH----     | 122 |     |     |     |     |  |
| CAE46968.1_HexA_E. histolytica |                                                 | -----MLFIFIVFISSVFAGNGLNVQNQLLLMPYPSSVSFQWKSPLAIALTSSIQLN----           | 52  |     |     |     |     |  |
| AAB00965.1_HexA_H. sapiens     |                                                 | -----MTSSRLWFSLLLAAAFAGRAT-----ALWPWPQNFQTSQRYVLYPNNFQFYD----           | 49  |     |     |     |     |  |
| AAA52645.1_HexB_H. sapiens     |                                                 | LLLATLLAAMLALLTQVALVVQVAEAAAPSVSAKPGPALWPLPLSVKMTPNLLHLAPENFYISHS----   | 82  |     |     |     |     |  |
| AAC53246.1_HexA_M. musculus    |                                                 | -----MAGCRLWVSLLLAAALACLAT-----ALWPWPQYIQTYHRRYTLYPNNFQFRYH----         | 49  |     |     |     |     |  |
| AAA18776.1_HexB_M. musculus    |                                                 | -----RSAPGLLLLQALVSLVSLALVAP---ARLQPALWPPRSVQMFPRLLYISAEDFSIDHS----     | 61  |     |     |     |     |  |
| ABI181756.1_Hex1_O. furnacalis |                                                 | D-----NGKCVKLKNDPRSSEPALSLEACKMFCN-EYGLLWPRPT-GEADLGNFLSKINLNSIEVK----  | 90  |     |     |     |     |  |
| AEQ33603.1_HexTF_T. flavus     |                                                 | -----MRVS-LVTVSLCLASA--VAGVAVNPLPAPR-----SITWGTSGPISVPHNVD----          | 44  |     |     |     |     |  |
| ACI15900.1_NagA_T. maritima    |                                                 | -----MDVDLGKLFECGFNDNEEVKEIIRKYRPTGILIYPG---VLSKEYLLMDFMSFLSK----       | 54  |     |     |     |     |  |
| AAK16587.1_CbsA_T. neapolitana |                                                 | -----MDVDLGKLFECGFDDFNEEAREVIQYRPAVLIYPG---VLSKEYLFLDFMNFLSR----        | 54  |     |     |     |     |  |
| CAA63123.1_HexB_S. scrofa      |                                                 | -----MEVATRPAAAGSGGAERWARDTSGAESLGLWPLPFAVDISPRSLHLSNNFFFGHS----        | 58  |     |     |     |     |  |

|                                | 360      | 370                                             | 380            | 390                                            | 400                                           | 410 | 420 |  |
|--------------------------------|----------|-------------------------------------------------|----------------|------------------------------------------------|-----------------------------------------------|-----|-----|--|
| WP_082768773.1 Nah20B_P. hydro | LLVYPHVL | PFVTPEQTKR                                      | -----          | RVGDKVPLATPEVMFEHYASINALAAESATTAPRLIPHTVSSQFDA | 245                                           |     |     |  |
| WP_068373836.1 Nah20A_P. hydro | -----    | -----                                           | -----          | VSEARCELILKEQLEQLQQVEVLWVT                     | 76                                            |     |     |  |
| BAD00143.1 Nah20A_A. hydrophil | EKPMP    | -----                                           | ADGWKR         | -----                                          | TKDDNNILMNSETRFAANQSTLLPAGKIDDRILPSPMKQVVKAGP | 231 |     |  |
| BAF76001.1 NahB_A. hydrophila  | NPPSP    | -----                                           | -----          | -----                                          | GPDLPQVEAVN-GLVPQPAHLIYTEGN                   | 144 |     |  |
| BAI94822.1 BbhI_B. bifidum     | HLTIETD  | DTLALPTVPDGYTVKFNGADYEQLIAADGTVNHPLVDKTVQVAYVVD | TATGNTKTTSDIPY | 420                                            |                                               |     |     |  |
| AAQ05800.1 Hex20A_C. fimi      | -----    | -----                                           | -----          | -----                                          | APELVAVGVLAADLLGRLSGRPVEVRY                   | 60  |     |  |
| BAI63641.1 Hex1t_Paenibacillus | G        | -----                                           | -----          | -----                                          | ETDELFNIGQALAKKLNASTGYTISVVK                  | 76  |     |  |
| CAA55582.1 NahA_P. gingivalis  | -----    | -----                                           | -----          | -----                                          | AEELKPIAKLADKLRASADLSIQIEI                    | 89  |     |  |
| BAA84281.1 Hex99_P. piscicida  | QTKQAVN  | -----                                           | -----          | -----                                          | DNMPVQTSAIRFAENSATHMALPLKNRL                  | 211 |     |  |
| BAB84321.1 Hex86_P. piscicida  | -----    | -----                                           | -----          | -----                                          | QHQAQSVAAQQLATFLRSPTGYQLPVSQ                  | 82  |     |  |
| AAB03808.1 Chb_S. marcescens   | VAPFT    | -----                                           | GDQWKR         | -----                                          | TKDDKNILMTPASRFVSNADLQTLPGALRGKIVPTPMQVKVHAQD | 230 |     |  |
| AAS02154.1 GcnA_S. gordonii    | -----    | -----                                           | -----          | -----                                          | GQDEVQIEEEAAYEDLAYMADCSRNAV                   | 99  |     |  |
| AAK98861.1 StrH_S. pneumoniae  | FAKKEIF  | FNIGLDEYANDATDAKGWSVLQADKYYPNEGYPVKGYEKFIAYAND  | ARIKSHGLKPMFND | 417                                            |                                               |     |     |  |
| CAB87223.1 HexA_S. coelicolor  | -----    | -----                                           | -----          | -----                                          | DSREARRVGDYADLLRPATGYRLPVTS                   | 103 |     |  |
| AAC38798.3 SpHex_S. plicatus   | -----    | -----                                           | -----          | -----                                          | DSREARRVGDYADLLRPATGYRLPVTA                   | 74  |     |  |
| AKC34128.1 Hex1_uncultured Act | -----    | -----                                           | -----          | -----                                          | NAPEVAQIGEFIAAALRPATGLALPVTA                  | 62  |     |  |
| AKC34129.1 Hex2_uncultured Bac | -----    | -----                                           | -----          | -----                                          | DRALESEAKLASDLAKLTDSQPKTVV                    | 74  |     |  |
| AAC44672.1 ExoI_V. furnissii   | SPYRE    | -----                                           | -----          | -----                                          | RSEIPATDAATLSLLPKPNHIERLDGE                   | 154 |     |  |
| AAA88682.1 Chb_V. harveyi      | VTGLE    | -----                                           | GNNLKR         | -----                                          | TPDDNNVFANAVSRFEKNEDLATQDVSTT                 | 225 |     |  |
| AAD30612.1 AtHex1_A. thaliana  | -----    | -----                                           | -----          | -----                                          | ILAPEH---QYLSASVTRYHNLRSENY                   | 80  |     |  |
| AAM91092.1 AtHex3_A. thaliana  | -----    | -----                                           | -----          | -----                                          | YGDASGILKEGFDRMLGVVRLSHV                      | 86  |     |  |
| BAE99290.1 AtHex3_A. thaliana  | -----    | -----                                           | -----          | -----                                          | GGGSLIIRAAFDYRMGIIFKHAS                       | 83  |     |  |
| AAM13977.1 HexA_A. oryzae      | -----    | -----                                           | -----          | -----                                          | LRTSDSDADGIVADAWNRAWETIVALRW                  | 73  |     |  |
| AAT99455.1 BmGlcNAcase3_B. mor | P        | -----                                           | -----          | -----                                          | ILSNAVQRSLAVIREMLRIASPYVNRNAP                 | 95  |     |  |
| AAC60521.1 BmChiGlcNAcase_B. m | -----    | -----                                           | -----          | -----                                          | ITKQKSD-DLITAAADRFKTLVSSSV                    | 119 |     |  |
| CCD73477.2 CeHEX-4_C. elegans  | -----    | -----                                           | -----          | -----                                          | APPRVEYLIEFFKLLSKHHVDGILIEYE                  | 88  |     |  |
| AAA34346.2 Hex1_C. albicans    | -----    | -----                                           | -----          | -----                                          | QANTSC---PLEDAFVRTVSATEKSKW                   | 74  |     |  |
| ADU20405.1 βHex_C. annum       | -----    | -----                                           | -----          | -----                                          | ISHPTH---RYLTPTVYRYRRLILSEHY                  | 77  |     |  |
| ABB18373.1 CpHEX1_C. posadasii | -----    | -----                                           | -----          | -----                                          | YSGPRD---RTIIAAWRRTWGSIVQLRW                  | 72  |     |  |
| AAA33230.1 NagA_D. discoideum  | -----    | -----                                           | -----          | -----                                          | IESATFSVSMdryTN-----LFFPFSNES                 | 74  |     |  |
| AAF46406.1 Hex2_D. melanogaste | -----    | -----                                           | -----          | -----                                          | VVAPGEAATQFLRETNRFLVSNLLKECI                  | 147 |     |  |
| AAF47881.1 Hex1_D. melanogaste | -----    | -----                                           | -----          | -----                                          | FNGIARQQ-KLWRAVEDRFMNMLEAQIP                  | 121 |     |  |
| AAM29423.1 Fdl_D. melanogaster | -----    | -----                                           | -----          | -----                                          | VDTAHREVRKQQLAFDWFLKDLRLIQR                   | 150 |     |  |
| CAE46968.1 HexA_E. histolytica | -----    | -----                                           | -----          | -----                                          | VKSTCNTDCMNFKSNFNHTISFPLQQQT                  | 81  |     |  |
| AAB00965.1 HexA_H. sapiens     | -----    | -----                                           | -----          | -----                                          | VSSAAQPGCSVLDEAFQRYRDLFGSGS                   | 77  |     |  |
| AAA52645.1 HexB_H. sapiens     | -----    | -----                                           | -----          | -----                                          | PNSTAGPSCSLDEAFRRYHGYIFGFYK                   | 110 |     |  |
| AAC53246.1 HexA_M. musculus    | -----    | -----                                           | -----          | -----                                          | VSSAAQGGCVLDEAFRRYRNLLFGSGS                   | 77  |     |  |
| AAA18776.1 HexB_M. musculus    | -----    | -----                                           | -----          | -----                                          | PNSTAGPSCSLDEAFRRYYNYVFGFYK                   | 89  |     |  |
| ABI81756.1 Hex1_O. furnacalis  | -----    | -----                                           | -----          | -----                                          | ILKKGATD-DLMEAAAKRFKEQVSLAIP                  | 117 |     |  |
| AEQ33603.1 HexTF_T. flavus     | -----    | -----                                           | -----          | -----                                          | VKLKPN---AIINDAWERAWTSIKQLRW                  | 69  |     |  |
| ACI15900.1 NagA_T. maritima    | -----    | -----                                           | -----          | -----                                          | EGDFLISSDHEGGQLEVLKYVPSSPGN                   | 81  |     |  |
| AAK16587.1 CbsA_T. neapolitana | -----    | -----                                           | -----          | -----                                          | NGRFIVSSDHEGGQLEVLKYVPSFPGN                   | 81  |     |  |
| CAA63123.1 HexB_S. scrofa      | -----    | -----                                           | -----          | -----                                          | PTSKAGSSCEILDEAFRRYYDFIFGFYK                  | 86  |     |  |

|                                | 430                                                              | 440                                                                  | 450   | 460                                            | 470             | 480   | 490 |  |
|--------------------------------|------------------------------------------------------------------|----------------------------------------------------------------------|-------|------------------------------------------------|-----------------|-------|-----|--|
| WP_082768773.1_Nah20B_P. hydro | .... .... .... .... .... .... .... .... .... .... .... .... .... | TQRVSVSQG                                                            | ----- | IAVDEASLSQFSAA                                 | FORLAKKGLNTQSTG | ----- | 283 |  |
| WP_068373836.1_Nah20A_P. hydro |                                                                  | AKDQAN                                                               | ----- | LLVEVEGVTVQMEVGGK                              | -----           | 99    |     |  |
| BAD00143.1_Nah20A_A. hydrophil |                                                                  | QVDFST-IK                                                            | ----- | LNALDLPSPRAEALKTQLTKLGVTLSDTG                  | -----           | 268   |     |  |
| BAF76001.1_NahB_A. hydrophila  |                                                                  | FRLAERAHV                                                            | ----- | GGPVPLASLLAHFN                                 | -ELTGLALTQDHD   | ----- | 179 |  |
| BAI94822.1_BbhI_B. bifidum     |                                                                  | VVKGTNQQQE                                                           | ----- | GNNAKPTIIPETAEWHSTSAAKLAASAVTKVVYDDDSLKAVVDEFV | -----           | 476   |     |  |
| AAQ05800.1_Hex20A_C. fimi      |                                                                  | TEGGAPSV                                                             | ----- | VRLRLSED                                       | -----           | 76    |     |  |
| BAI63641.1_Hex1t_Paenibacillus |                                                                  | SNQPTAGS                                                             | ----- | IYLTTVGGN                                      | -----           | 93    |     |  |
| CAA55582.1_NahA_P. gingivalis  |                                                                  | GEEPSGN                                                              | ----- | AIYIGVDTA                                      | -----           | 105   |     |  |
| BAA84281.1_Hex99_P. piscicida  |                                                                  | VPQPHSVVTP                                                           | ----- | NDEFLTLMSQLTSISGAASLAKEATFLQTALRDILSGTFAIN     | ----            | 263   |     |  |
| BAB84321.1_Hex86_P. piscicida  |                                                                  | ADSTTKN                                                              | ----- | SIAFKIVD                                       | -----           | 97    |     |  |
| AAB03808.1_Chb_S. marcescens   |                                                                  | ADLRKG-VA                                                            | ----- | LDLSTLVKPAADVVSQRFALLGVFVQTNG                  | -----           | 267   |     |  |
| AAS02154.1_GcnA_S. gordonii    |                                                                  | NLSSAK                                                               | ----- |                                                | -----           | 105   |     |  |
| AAK98861.1_StrH_S. pneumoniae  |                                                                  | GIYNSDTSFGSFDKDIIVSMWTGGWGGYDVASSKLLAEKGHIILNTNDAWCYVLGRNADGGWYNLDQG | ----- |                                                | -----           | 487   |     |  |
| CAB87223.1_HexA_S. coelicolor  |                                                                  | ---HGHGG                                                             | ----- | IRLRLAEG                                       | -----           | 116   |     |  |
| AAC38798.3_SpHex_S. plicatus   |                                                                  | ---HGHGG                                                             | ----- | IRLRLAGG                                       | -----           | 87    |     |  |
| AKC34128.1_Hex1_uncultured Act |                                                                  | GAAQERGT                                                             | ----- | IHLTTAAAD                                      | -----           | 79    |     |  |
| AKC34129.1_Hex2_uncultured Bac |                                                                  | KELTNALPS                                                            | ----- | EILLDFSEK                                      | -----           | 92    |     |  |
| AAC44672.1_ExoI_V. furnissii   |                                                                  | FALTAGSQI                                                            | ----- | SLQSSCAETAATWLKQELTHLYQWQPHDI                  | -----           | 192   |     |  |
| AAA88682.1_Chb_V. harveyi      |                                                                  | VDIADG-IA                                                            | ----- | LPKDAFDATQFAAIQDRAEVVGVVDVRG-D                 | -----           | 261   |     |  |
| AAD30612.1_AtHex1_A. thaliana  |                                                                  | SPLIS                                                                | ----- | YPVKLMKRYTLRN                                  | -----           | 98    |     |  |
| AAM91092.1_AtHex3_A. thaliana  |                                                                  | ISG                                                                  | ----- | DRNSSGTGGSALLQGLH                              | -----           | 106   |     |  |
| BAE99290.1_AtHex3_A. thaliana  |                                                                  | GRGSL                                                                | ----- | SRIRFLKMVEYDITSLK                              | -----           | 106   |     |  |
| AAM13977.1_HexA_A. oryzae      |                                                                  | VPAATE                                                               | ----- | APISSFEPFP--TPTAG                              | -----           | 98    |     |  |
| AAT99455.1_BmGlcNAcase3_B. mor |                                                                  | QQVLDD                                                               | ----- | DTYDGPLKS---LSIYL                              | -----           | 115   |     |  |
| AAC60521.1_BmChiGlcNAcase_B. m |                                                                  | KGFSAK                                                               | ----- | AAGKSVTVYLVN                                   | -----           | 137   |     |  |
| CCD73477.2_CeHEX-4_C. elegans  |                                                                  | DMFPYSG                                                              | ----- |                                                | -----           | 95    |     |  |
| AAA34346.2_Hex1_C. albicans    |                                                                  | HP                                                                   | ----- | FPIDDFNTANGKNIKTS                              | -----           | 93    |     |  |
| ADU20405.1_βHex_C. annum       |                                                                  | RHIIT                                                                | ----- | PSINLTSSTPLQH                                  | -----           | 95    |     |  |
| ABB18373.1_CpHEX1_C. posadasii |                                                                  | TPAALE                                                               | ----- | APIPTFAPFIVGNKRD                               | -----           | 98    |     |  |
| AAA33230.1_NagA_D. discoideum  |                                                                  | -----                                                                | ----- | EPSSNESFLLSVT                                  | -----           | 87    |     |  |
| AAF46406.1_Hex2_D. melanogaste |                                                                  | RNCTLE                                                               | ----- | TSKQILVRSTVAN                                  | -----           | 166   |     |  |
| AAF47881.1_Hex1_D. melanogaste |                                                                  | DRKVLA                                                               | ----- | RGYRMSVNINTP                                   | -----           | 140   |     |  |
| AAM29423.1_Fdl_D. melanogaster |                                                                  | LDYGGG                                                               | ----- | SSEPTVSESSSKSRHHA                              | -----           | 177   |     |  |
| CAE46968.1_HexA_E. histolytica |                                                                  | GLQDFKVSFL                                                           | ----- | KEIDLPRITPSVSSVITDVVELS                        | -----           | 115   |     |  |
| AAB00965.1_HexA_H. sapiens     |                                                                  | WPRPYL                                                               | ----- | TGKRHTLEKNVLVSVV                               | -----           | 100   |     |  |
| AAA52645.1_HexB_H. sapiens     |                                                                  | WHHEPA                                                               | ----- | EFQAKTQVQQLLVISITL                             | -----           | 133   |     |  |
| AAC53246.1_HexA_M. musculus    |                                                                  | WPRPSF                                                               | ----- | SNKQOTLGKNILVSVV                               | -----           | 100   |     |  |
| AAA18776.1_HexB_M. musculus    |                                                                  | RHHGPA                                                               | ----- | RFRAEPQLQKLLVSITL                              | -----           | 112   |     |  |
| ABI81756.1_Hex1_O. furnacalis  |                                                                  | RGSTPK                                                               | ----- | LTGKAVDVYLVN                                   | -----           | 135   |     |  |
| AEQ33603.1_HexTF_T. flavus     |                                                                  | VPQATE                                                               | ----- | APISSYEPFPTVAPTSASTASSTPLSSSSAAVAARS           | -----           | 112   |     |  |
| ACI15900.1_NagA_T. maritima    |                                                                  | LAFGKN                                                               | ----- |                                                | -----           | 87    |     |  |
| AAK16587.1_CbsA_T. neapolitana |                                                                  | LAAGKV                                                               | ----- |                                                | -----           | 87    |     |  |
| CAA63123.1_HexB_S. scrofa      |                                                                  | WHQGSY                                                               | ----- | QLCFGTELOQLQVHV                                | -----           | 107   |     |  |



|                                | 570                                                                  | 580                            | 590 | 600 | 610 | 620 | 630 |
|--------------------------------|----------------------------------------------------------------------|--------------------------------|-----|-----|-----|-----|-----|
| WP_082768773.1 Nah20B_P. hydro | -----DNAGLFYGLMSLYQLLDGNN-----                                       | -----LPVGNITDAPRYE-----        | 349 |     |     |     |     |
| WP_068373836.1 Nah20A_P. hydro | -----TERGMLHGVQTLLQLVNRQRS-----                                      | -----IPAVDIDDKPREA-----        | 162 |     |     |     |     |
| BAD00143.1 Nah20A_A. hydrophil | -----DVDGAFWCAQSLLSLGVDK-----                                        | -----LVSQMSVEDAPRE-----        | 334 |     |     |     |     |
| BAF76001.1 NahB_A. hydrophila  | -----GEAGWRHGLVSLAOWALQHGES-----                                     | -----LPLCLTVRDAPREG-----       | 243 |     |     |     |     |
| BAI94822.1 BbhI_B. bifidum     | -----SVTGNMYAMQTILQMTKQDANG-----                                     | -----FVIGSMRDYPRET-----        | 567 |     |     |     |     |
| AAQ05800.1 Hex20A_C. fimi      | -----SAAGLVRAVVTILRQTVS-----SL-----GDGT-LTVPALRVEDHPRMA-----         | -----                          | 136 |     |     |     |     |
| BAI63641.1 Hex1t_Paenibacillus | -----KPEGVFRNQITLLQLLPAGIEKNTV-----                                  | -----VSGVQWVPHSNISDKPEYE-----  | 160 |     |     |     |     |
| CAA55582.1 NahA_P. gingivalis  | -----SAHGAFYGMQTILLQLPAEVESSE-----                                   | -----V-LLPMTVPVGEIKDEPAFG----- | 171 |     |     |     |     |
| BAA84281.1 Hex99_P. piscicida  | -----SDAQGVFYGIQTLLROMIPTTVYKTAKNSATLSDNAVLPASTILLDAPRE-----         | -----                          | 357 |     |     |     |     |
| BAB84321.1 Hex86_P. piscicida  | -----TATGLFWQMQLSRQLLPAEIESRMP-----                                  | -----INQASWAIPEVEIKDQPRFS----- | 164 |     |     |     |     |
| AAB03808.1 Chb_S. marcescens   | -----DQAGVFGYGLQSILSLVPSDGS-----                                     | -----KIATLDASDAPREP-----       | 339 |     |     |     |     |
| AAS02154.1 GcnA_S. gordonii    | -----YFGYFRGRYTVAELOEIEDYAAD-----                                    | -----FDMSFVPCIOTLAHLS-----     | 172 |     |     |     |     |
| AAK98861.1 StrH_S. pneumoniae  | EVPKDLNRYTAESVAAVKEEAKAIRSLDSNLSRAQQDTIDQAIKLOETVNNLTLTPEAQKEEAKREVE | -----                          | 627 |     |     |     |     |
| CAB87223.1 HexA_S. coelicolor  | -----KAAGLFHGVQTLLRQLLPAAVEKDSA-----                                 | -----QPGP-WLVAGGTIEDTPRYA----- | 181 |     |     |     |     |
| AAC38798.3 SpHex_S. plicatus   | -----KAAGLFHGVQTLLRQLLPAVEKDSA-----                                  | -----QPGP-WLVAGGTIEDTPRYA----- | 152 |     |     |     |     |
| AKC34128.1 Hex1_uncultured Act | -----RPAGLFRGVQTLLRQLLPAVERRTV-----                                  | -----APGP-WTLPTGVLRDAPREA----- | 145 |     |     |     |     |
| AKC34129.1 Hex2_uncultured Bac | -----DAAGVFICTRTILLQLLPAKLAEG-----                                   | -----SAAIPAVTITDYPREA-----     | 153 |     |     |     |     |
| AAC44672.1 ExoI_V. furnissii   | -----SHIGFVHASATLLQLVLRPDGDL-----                                    | -----LVPHIVIKDAPREK-----       | 261 |     |     |     |     |
| AAA88682.1 Chb_V. harveyi      | -----DQAGAFYAVQSIFGLVDSQAD-----                                      | -----SLPQLSIKDAPRED-----       | 333 |     |     |     |     |
| AAD30612.1 AtHex1_A. thaliana  | -----AHSAGWAMRGLETFSQMIWGTSPD-----                                   | -----LCLPVG-IYIQDSPLIFG-----   | 172 |     |     |     |     |
| AAM91092.1 AtHex3_A. thaliana  | -----EAKSVYCALHGLQTFSQLCHFNKKV-----                                  | -----IEILMTPWNIIDQPRFS-----    | 183 |     |     |     |     |
| BAE99290.1 AtHex3_A. thaliana  | -----EANTVYGALRGLETFSQLCAFDTITS-----                                 | -----VOIYKAPWYIOGKPRFG-----    | 186 |     |     |     |     |
| AAM13977.1 HexA_A. oryzae      | -----AETVWGALHAETTLQQLVVISDGHG-----                                  | -----LIIEEP-VNIKDSPLYP-----    | 183 |     |     |     |     |
| AAT99455.1 BmGlcNAcase3_B. mor | -----SIWGILRGLESWTHLPHLSNDRD-----                                    | -----QLHINK-GEVHDFPRYA-----    | 183 |     |     |     |     |
| AAC60521.1 BmChiGlcNAcase_B. m | -----GNSFFGVNRNGLETLSQLIVYDDIRNN-----                                | -----LLIVRD-VTIKDRPVYP-----    | 212 |     |     |     |     |
| CCD73477.2 CeHEX-4_C. elegans  | -----LEVIPLIQSEGHLEFVLKSKFMG-----                                    | -----LSEDLIDLN-----            | 155 |     |     |     |     |
| AAA34346.2 Hex1_C. albicans    | -----AATTWGALHGLVSLQQLIIHTSEDK-----                                  | -----YVVPSS-VTISDFPNK-----     | 167 |     |     |     |     |
| ADU20405.1 βHex_C. annum       | -----AGTVWGAMRGLETFSQLVYGNP-----                                     | -----TRVAG-VYISDLPIET-----     | 167 |     |     |     |     |
| ABB18373.1 CpHEX1_C. posadasii | -----AKTTWGLRAETTLQQLVIFKRGR-----                                    | -----FLVEQP-VDIKDPLYP-----     | 178 |     |     |     |     |
| AAA33230.1 NagA_D. discoideum  | -----NIYGAMRGLETTFKQLIVYNELE-----                                    | -----NSYIVCVSISDSPRYP-----     | 156 |     |     |     |     |
| AAF46406.1 Hex2_D. melanogaste | -----ATTVYGARHAFETLSNLVTG-SLSNG-----                                 | -----LLMVT-ANITDRPAPS-----     | 236 |     |     |     |     |
| AAF47881.1 Hex1_D. melanogaste | -----ASNFFGARHGLETLAQLIVYDDIRRE-----                                 | -----VQVTAN-ATINDAPVYK-----    | 215 |     |     |     |     |
| AAM29423.1 FdI_D. melanogaster | -----ANSYFGARHGLSTLQQLIWFDDEDHL-----                                 | -----LHTYAN-SKVKDAPKER-----    | 277 |     |     |     |     |
| CAE46968.1 HexA_E. histolytica | -----TVYGARHAFETLLQLIRISSNK-----                                     | -----FVISQLPIKISDAPREK-----    | 184 |     |     |     |     |
| AAB00965.1 HexA_H. sapiens     | -----TVWGALRGLETFSQLVWKSAG-----                                      | -----TFFINK-TEIEDFPREP-----    | 168 |     |     |     |     |
| AAA52645.1 HexB_H. sapiens     | -----RVWGALRGLETFSQLVYQDSYG-----                                     | -----TFTTINE-STIIDSPPRES-----  | 201 |     |     |     |     |
| AAC53246.1 HexA_M. musculus    | -----TVWGALRGLETFSQLVWKSAG-----                                      | -----TFFINK-TKIKDFPREP-----    | 168 |     |     |     |     |
| AAA18776.1 HexB_M. musculus    | -----SVWGALRGLETFSQLVYQDSFG-----                                     | -----TFTTINE-SSIADSPREP-----   | 180 |     |     |     |     |
| ABI81756.1 Hex1_O. furnacalis  | -----ANSFFGMRHGLTSLQQLFVDDIRDH-----                                  | -----LLMVRD-VNISDKPVYP-----    | 210 |     |     |     |     |
| AEQ33603.1 HexTF_T. flavus     | -----ANTTWGALHAETTLQQLVIYQDNS-----                                   | -----LIIEQP-VHIEDSPLYP-----    | 208 |     |     |     |     |
| ACI15900.1 NagA_T. maritima    | -----MVFAVPLDLLSEESS-----                                            | -----VIDIRSYG-----             | 133 |     |     |     |     |
| AAK16587.1 CbsA_T. neapolitana | -----MVFAVPLDLLSEKGS-----                                            | -----VVDLRSEF-----             | 133 |     |     |     |     |
| CAA63123.1 HexB_S. scrofa      | -----TVWGALRGLETFSQLVYQDSYG-----                                     | -----TFTTINE-SEIIDEFPREP-----  | 175 |     |     |     |     |

|                                | 640   | 650           | 660       | 670     | 680     | 690    | 700                |                        |     |
|--------------------------------|-------|---------------|-----------|---------|---------|--------|--------------------|------------------------|-----|
| WP_082768773.1_Nah20B_P. hydro | ----  | FRGLHVDVARNEH | SKAFTIN   | LEQMAAL | KINKLH  | EHLEAE | DAWRLEI            | -----PGIP              | 405 |
| WP_068373836.1_Nah20A_P. hydro | ----  | WRGLLIDSVRHE  | MPVDTIK   | RQLRGMA | SARKNV  | LHWHHL | DDQGWRIAS          | -----KAMP              | 218 |
| BAD00143.1_Nah20A_A. hydrophil | ----  | YRCMQTDVARH   | ERSPETM   | KKLVDQ  | MSAMKN  | NVLHGL | TNDGWRLEI          | -----PGIP              | 390 |
| BAF76001.1_NahB_A. hydrophila  | ----  | FRGIFLDCARH   | EHSIATL   | KRLKQMS | SLYKEN  | RFHWHL | TDDEGWRLEI         | -----KTFE              | 299 |
| BAI94822.1_BbhI_B. bifidum     | ----  | TRGLLLDVARKE  | PVSLEMM   | REITRTM | RYKKND  | FQAHLS | SDNYIFLENY         | GKGDNEDEAFKAYDAFRLE    | 633 |
| AAQ05800.1_Hex20A_C. fimi      | ----  | WRGLSIDVARH   | EFTVDDL   | KAIIGLL | AHYKIN  | NVLHHL | TDQGWVRHL          | -----PSRP              | 192 |
| BAI63641.1_Hex1t_Paenibacillus | ----  | YRGLMLDVARH   | EFTVDEV   | KROIDL  | ASQYKIN | KFHHLS | DDQGWRIEI          | -----KSWP              | 216 |
| CAA55582.1_NahA_P. gingivalis  | ----  | YRGFMLDVCRH   | ELSVEDI   | KKHIDIM | AMFKIN  | RFHWHL | TDQAWRIEI          | -----KKYP              | 227 |
| BAA84281.1_Hex99_P. piscicida  | ----  | YRCMMLDVS     | RNEFSKET  | TVFKLL  | DMAFYK  | INNF   | FEINLANDEGWRLEI    | -----PGIP              | 413 |
| BAB84321.1_Hex86_P. piscicida  | ----  | YRCMHLDVS     | RHFFDVA   | FKRYID  | WLAMHK  | ENVF   | QWHLTDQGWRIAI      | -----DAYP              | 220 |
| AAB03808.1_Chb_S. marcescens   | ----  | YRGIFLDCARH   | EHKDAVL   | RLLDQMA | HYKIN   | KFHHLS | DDQGWRIEI          | -----PGIP              | 395 |
| AAS02154.1_GcnA_S. gordonii    | ----  | AFVKWGIKEV    | QELRDVED  | ILLIGE  | EKVYDL  | IEGMFQ | TMAHLHTRKINIG      | -----MDEA              | 230 |
| AAK98861.1_StrH_S. pneumoniae  | KLAKN | KVISIDAG      | RKYFTLD   | QKRV    | DKASEL  | GYSDV  | HLLGNDGLRFL        | LLNDMTITANGKTYASDDVKKA | 697 |
| CAB87223.1_HexA_S. coelicolor  | ----  | WRSAMLDVS     | RHFFSVDE  | VKRYID  | RVALYK  | YNKLH  | HLISDDQGWRLAI      | -----DSWP              | 237 |
| AAC38798.3_SpHex_S. plicatus   | ----  | WRSAMLDVS     | RHFFGVDE  | VKRYID  | RVARYK  | YNKLH  | HLISDDQGWRIAI      | -----DSWP              | 208 |
| AKC34128.1_Hex1_uncultured Act | ----  | WRCAMLDVARH   | FFPVADV   | KRYDLL  | AYYKEN  | NVLHHL | TDQGWRIEI          | -----KSWP              | 201 |
| AKC34129.1_Hex2_uncultured Bac | ----  | WRCMMLDVG     | RHFFPVPD  | IKRFID  | WMAFHK  | INSE   | FHWHLTDQGWRIEI     | -----KKYP              | 209 |
| AAC44672.1_ExoI_V. furnissii   | ----  | YRCMMLDCA     | RHFFPLERV | KRLINQ  | LAHYKIN | TFHWHL | TDDEGWRLEI         | -----KSLP              | 317 |
| AAA88682.1_Chb_V. harveyi      | ----  | YRCVMVDVARH   | EHSKDAIL  | ATLDQMA | AYKIN   | KLHHL  | TDDEGWRLEI         | -----PGIP              | 389 |
| AAD30612.1_AtHex1_A. thaliana  | ----  | HRGVLLDTS     | RNYYGVD   | DMRTIK  | AMSANK  | INVE   | FHHITDSQSFPLVL     | -----PSEP              | 228 |
| AAM91092.1_AtHex3_A. thaliana  | ----  | YRGLLIDTS     | RHYLP     | LPVIK   | NVIDSM  | TYAKIN | NVLHHIVDTQSEPLEI   | -----PSYP              | 239 |
| BAE99290.1_AtHex3_A. thaliana  | ----  | YRGLLIDTS     | RHYLP     | IDVIK   | QIESM   | SFAKIN | NVLHHIVDEQSEPLET   | -----PTYE              | 242 |
| AAM13977.1_HexA_A. oryzae      | ----  | YRGIMLDTG     | RNEVSLPK  | IFEQLE  | GMSLSK  | INVLH  | WHIDDAQSWPIWV      | -----DVYP              | 239 |
| AAT99455.1_BmGlcNAcase3_B. mor | ----  | HRCLLVDTS     | RHYISMS   | NILLID  | DAMAMN  | KINVE  | FHHIVDDQSEFPYQS    | -----ERFP              | 239 |
| AAC60521.1_BmChiGlcNAcase_B. m | ----  | YRGILLDTA     | RNEYSID   | SIKRTD  | AMAAYK  | INVE   | FHHITDSQSEPLVL     | -----QKRN              | 268 |
| CCD73477.2_CeHEX-4_C. elegans  | ----  | TICISDSK      | ---       | SIDIVK  | QMIQ    | IRRLHP | NSTRIHIGADEAYHVAED | -----QRCI              | 207 |
| AAA34346.2_Hex1_C. albicans    | ----  | HRGLMIDSG     | RNELTVDS  | ILEQID  | IMALSK  | NSLH   | WHLADSQSWPVAL      | -----ESYP              | 223 |
| ADU20405.1_βHex_C. annum       | ----  | HRGVMLDTS     | RNYYGVD   | LLRLIK  | AMSMNK  | INVE   | FHHITDSHSEPLVV     | -----PSEP              | 223 |
| ABB18373.1_CpHEX1_C. posadasii | ----  | VRCIMIDTA     | RNEISVKK  | IFEQD   | GMA     | LSKIN  | NVLHHITDQSWPEVEV   | -----RSYP              | 234 |
| AAA33230.1_NagA_D. discoideum  | ----  | WRGFMVDS      | SARHYIP   | KNMILH  | MDSLG   | FSKENT | LHWHMVDAVAFPVES    | -----TTYP              | 212 |
| AAF46406.1_Hex2_D. melanogaste | ----  | HRGVLLDTA     | RNEVPLKF  | FIRSTD  | AMAASK  | INVLH  | WHVVDTHSEPLEI      | -----TRVP              | 292 |
| AAF47881.1_Hex1_D. melanogaste | ----  | WRGLLLDTS     | RNYYSVKS  | IKRTLE  | GMA     | LVKIN  | TEHWHITDSHSEPLEV   | -----KKRP              | 271 |
| AAM29423.1_Fdl_D. melanogaster | ----  | YRGLMLDTS     | RHFFSVES  | IKRTIV  | GMGLAK  | INRF   | HWHLTDQSEFPYIS     | -----RYYP              | 333 |
| CAE46968.1_HexA_E. histolytica | ----  | WRGLMVDPS     | RNPLSPL   | MFKRIID | TLASV   | KANVL  | HLSDAQTFVFES       | -----KKYP              | 240 |
| AAB00965.1_HexA_H. sapiens     | ----  | HRGLLLDTS     | RHYLP     | LSSTILD | TDMAYN  | KINVE  | FHHVDDPSEFPYES     | -----FTFE              | 224 |
| AAA52645.1_HexB_H. sapiens     | ----  | HRGILIDTS     | RHYLP     | VKIILK  | TIDAMA  | FNKEN  | NVLHHIVDDQSEFPYQS  | -----ITFE              | 257 |
| AAE53246.1_HexA_M. musculus    | ----  | HRGVLLDTS     | RHYLP     | LSSTILD | TDMAYN  | KINVE  | FHHVDDQSEFPYES     | -----FTFE              | 224 |
| AAA18776.1_HexB_M. musculus    | ----  | HRGILIDTS     | RHYLP     | VKTIILK | TIDAMA  | FNKEN  | NVLHHIVDDQSEFPYQS  | -----ITFE              | 236 |
| ABI81756.1_Hex1_O. furnacalis  | ----  | YRGILLDTA     | RNYYSIES  | IKRTIE  | AMAAYK  | INVE   | FHHITDSQSEFPVT     | -----TKRN              | 266 |
| AEQ33603.1_HexTF_T. flavus     | ----  | WRCVMIDT      | GRNEFIT   | VPKIKE  | QIDGMA  | LSKIN  | LHWHLDDQSWPVHM     | -----DTYP              | 264 |
| ACI15900.1_NagA_T. maritima    | ----  | SDPKIVA       | EHGARACE  | GYLEGG  | VIPCIK  | HPG    | HGKAREDSHLLTPEVVD  | -----APFE              | 189 |
| AAK16587.1_CbsA_T. neapolitana | ----  | SDPEVVA       | SHGMEAC   | MGYFKG  | VIPCIK  | HPG    | HGKTADDSHYLLPTVN   | -----ASFE              | 189 |
| CAA63123.1_HexB_S. scrofa      | ----  | HRGILIDT      | GRHLSVKT  | IFKTI   | DAMA    | FNKEN  | NVLHHIVDDQSEFPYQS  | -----INFG              | 231 |

\*

|                                | 710                                                                  | 720         | 730 | 740 | 750 | 760          | 770 |
|--------------------------------|----------------------------------------------------------------------|-------------|-----|-----|-----|--------------|-----|
| WP_082768773.1 Nah20B_P. hydro | GGFRCFDPLEQTCLMPQLGSGPERK                                            |             |     |     |     | TKVNGYLTTQD  | 441 |
| WP_068373836.1 Nah20A_P. hydro | ASDG                                                                 |             |     |     |     | LFYTOQQ      | 229 |
| BAD00143.1 Nah20A_A. hydrophil | CSQRCHDESETKCLMPQLGSGPTSD                                            |             |     |     |     | NQSGGFYSKAD  | 426 |
| BAF76001.1 NahB_A. hydrophila  | CAWRGHG---                                                           | LAVGPQLSGGP |     |     |     | DPYGGYYTQSE  | 328 |
| BAI94822.1 BbbH_B. bifidum     | SSLTNDKGES                                                           |             |     |     |     | PTAEDYSISKKT | 655 |
| AAQ05800.1 Hex20A_C. fimi      | SAGT-----                                                            | SVGGG       |     |     |     | PGGFYNPAQ    | 210 |
| BAI63641.1 Hex1t_Paenibacillus | CSKG-----                                                            | QVGGG       |     |     |     | PGGYTTQEQ    | 234 |
| CAA55582.1 NahA_P. gingivalis  | CSTR-----                                                            | TEGDGTQ     |     |     |     | YSGFYTTQEQ   | 247 |
| BAA84281.1 Hex99_P. piscicida  | CAKRGYDLSESTMLHTFMGAANGFAPGDGIENKPTDETAANLGTAPSYQGFEIAQQNFLGKGWGYTVD |             |     |     |     |              | 483 |
| BAB84321.1 Hex86_P. piscicida  | CATRPHTVVGHTYDYQPLFDNKT                                              |             |     |     |     | VSGFYTKAQ    | 252 |
| AAB03808.1 Chb_S. marcescens   | GGQRCHDLSETTCLLPQYGGQP--D                                            |             |     |     |     | VYG-GFFSRQD  | 428 |
| AAS02154.1 GcnA_S. gordonii    | GRYLIKHG                                                             |             |     |     |     | FQNRSLLMCOH  | 249 |
| AAK98861.1 StrH_S. pneumoniae  | IEGTKAYYD                                                            |             |     |     |     | DPNGTALTOAE  | 718 |
| CAB87223.1 HexA_S. coelicolor  | GGST-----                                                            | EVGGG       |     |     |     | PGGHYTKAD    | 255 |
| AAC38798.3 SpHex_S. plicatus   | GGST-----                                                            | EVGGG       |     |     |     | PGGYTKAE     | 226 |
| AKC34128.1 Hex1_uncultured Act | GGST-----                                                            | AVDGA       |     |     |     | PGGYTTQEQ    | 219 |
| AKC34129.1 Hex2_uncultured Bac | CAFRESSPP---                                                         | YGNRNSDDGVR |     |     |     | YGGFYTTQEQ   | 238 |
| AAC44672.1 ExoI_V. furnissii   | CAWRGVD---                                                           | EVLEPQYSLLT |     |     |     | EKHGGFYTQEE  | 346 |
| AAA88682.1 Chb_V. harveyi      | CANRCFDTQEKSCLLPQLGSGPTTD                                            |             |     |     |     | NFGSGYFSKAD  | 425 |
| AAD30612.1 AtHex1_A. thaliana  | CSLG-----                                                            |             |     |     |     | PDMVYTPED    | 241 |
| AAM91092.1 AtHex3_A. thaliana  | AYSS-----                                                            |             |     |     |     | SQRYTFED     | 251 |
| BAE99290.1 AtHex3_A. thaliana  | AYS-----                                                             |             |     |     |     | WERYTFED     | 254 |
| AAM13977.1 HexA_A. oryzae      | -AYS-----                                                            |             |     |     |     | PHEIYSRND    | 251 |
| AAT99455.1 BmGlcNAcase3_B. mor | CAYH-----                                                            |             |     |     |     | ETLIYTKEN    | 252 |
| AAC60521.1 BmChiGlcNAcase_B. m | CAYS-----                                                            |             |     |     |     | PTKVYTKQD    | 281 |
| CCD73477.2 CeHEX-4_C. elegans  | ESIG-----                                                            |             |     |     |     | KSDLKLEH     | 219 |
| AAA34346.2 Hex1_C. albicans    | -AYS-----                                                            |             |     |     |     | NDEVYSKND    | 235 |
| ADU20405.1 βHex_C. annuum      | CAYG-----                                                            |             |     |     |     | NEMMYSPAD    | 236 |
| ABB18373.1 CpHEX1_C. posadasii | -AYS-----                                                            |             |     |     |     | RREYGPDS     | 246 |
| AAA33230.1 NagA_D. discoideum  | -AFS-----                                                            |             |     |     |     | PSATFSHDD    | 224 |
| AAF46406.1 Hex2_D. melanogaste | CAYS-----                                                            |             |     |     |     | SSQTYSRQD    | 305 |
| AAF47881.1 Hex1_D. melanogaste | CAYS-----                                                            |             |     |     |     | QRQVYTRRD    | 284 |
| AAM29423.1 Fdl_D. melanogaster | CAYS-----                                                            |             |     |     |     | ESETYSED     | 346 |
| CAE46968.1 HexA_E. histolytica | CMYD-----                                                            |             |     |     |     | ESFVLTSQF    | 253 |
| AAB00965.1 HexA_H. sapiens     | GSYNP-----                                                           |             |     |     |     | VTHIYTAQD    | 238 |
| AAA52645.1 HexB_H. sapiens     | GSYS-----                                                            |             |     |     |     | LSHVYTPND    | 270 |
| AAC53246.1 HexA_M. musculus    | GSFNP-----                                                           |             |     |     |     | VTHIYTAQD    | 238 |
| AAA18776.1 HexB_M. musculus    | GSYS-----                                                            |             |     |     |     | LSHVYTPND    | 249 |
| ABI81756.1 Hex1_O. furnacalis  | CALS-----                                                            |             |     |     |     | PQKVYTKAA    | 279 |
| AEQ33603.1 HexTF_T. flavus     | -AYS-----                                                            |             |     |     |     | PWQTYSHED    | 276 |
| ACI15900.1 NagA_T. maritima    | DLLP-----                                                            |             |     |     |     | FRKVLEREKK   | 203 |
| AAK16587.1 CbsA_T. neapolitana | DLLP-----                                                            |             |     |     |     | FRRIQSRVK    | 203 |
| CAA63123.1 HexB_S. scrofa      | GSYS-----                                                            |             |     |     |     | LSHVYTPND    | 244 |

|                                | 780                                   | 790                                                      | 800   | 810 | 820 | 830 | 840   |     |
|--------------------------------|---------------------------------------|----------------------------------------------------------|-------|-----|-----|-----|-------|-----|
| WP_082768773.1_Nah20B_P. hydro | YIDILREDAHFF                          | TEVIPSIDMPGHSRAAIKSMEARYKRLVSEEK                         | ----- |     |     |     | TPEAE | 490 |
| WP_068373836.1_Nah20A_P. hydro | IREVVQYAALLG                          | IRVVPEFDVPGHASAIAVAYPELITQP                              | ----- |     |     |     |       | 268 |
| BAD00143.1_Nah20A_A. hydrophil | YIDLVRyakARG                          | VTVIPEINMPAHARAAVVSMEARYKRLMSEK                          | ----- |     |     |     | ETEAN | 475 |
| BAF76001.1_NahB_A. hydrophila  | VRELVAAGLG                            | TTIPEIDIPGHCHAAIKALPE                                    | ----- |     |     |     |       | 362 |
| BAI94822.1_BbhI_B. bifidum     | FKQFTQDERALG                          | MNVVPEIDVPAHANSFTKIWPELMVKGRVSPINSNRPLIDHLDVSKPETIAKIKEI | ----- |     |     |     |       | 723 |
| AAQ05800.1_Hex20A_C. fimi      | LAETVVARAARG                          | IRVVPEIDVPGHVNAATHAYGDLT                                 | ----- |     |     |     |       | 246 |
| BAI63641.1_Hex1t_Paenibacillus | FKDIVSYAAERY                          | TEVPEIDMPGHTNAALASYGELN                                  | ----- |     |     |     |       | 270 |
| CAA55582.1_NahA_P. gingivalis  | VRDIVQYASDHF                          | ITVPMIEMPGHAMAALAAYPQFR                                  | ----- |     |     |     |       | 283 |
| BAA84281.1_Hex99_P. piscicida  | FKEILQYAADRH                          | IDVIIIEYDFPAHARAIAKAMEHRYNKYKDS                          | ----- |     |     |     | DPVEA | 530 |
| BAB84321.1_Hex86_P. piscicida  | IKEIIEYAQARH                          | TEVPEIDIPGHSSAMLAAYPELS                                  | ----- |     |     |     |       | 288 |
| AAB03808.1_Chb_S. marcescens   | YIDIIEKYAARQ                          | TEVPEIDMPAHARAAVVSMEARYKKLHAAGK                          | ----- |     |     |     | EQEAN | 477 |
| AAS02154.1_GcnA_S. gordonii    | LERVLDIADKYG                          | FNCQMWSDMFFKLMSADGQYDRDVEIP                              | ----- |     |     |     |       | 288 |
| AAK98861.1_StrH_S. pneumoniae  | VTELIEYAKSKD                          | IGLIPAINSPGHMDAMLVAMEKLGKIKN                             | ----- |     |     |     |       | 757 |
| CAB87223.1_HexA_S. coelicolor  | YEEIVRYAASRH                          | LEVVPIDMPGHTNAALASYAELN                                  | ----- |     |     |     |       | 291 |
| AAC38798.3_SpHex_S. plicatus   | YKEIVRYAASRH                          | LEVVPIDMPGHTNAALASYAELN                                  | ----- |     |     |     |       | 262 |
| AKC34128.1_Hex1_uncultured Act | YADLARYAAERY                          | ITIVPEIDMPSETNAALASYALLN                                 | ----- |     |     |     |       | 255 |
| AKC34129.1_Hex2_uncultured Bac | LKDVVAYAAARH                          | ITVVPEIEMPGHAAAAIAAYPELG                                 | ----- |     |     |     |       | 274 |
| AAC44672.1_ExoI_V. furnissii   | IREVIAVAAERG                          | ITVPEIDIPGHSRAAIKALPE                                    | ----- |     |     |     |       | 380 |
| AAA88682.1_Chb_V. harveyi      | YVEILKYAKARN                          | TEVPEIDMPAHARAAVVSMEARYDRLMEEGK                          | ----- |     |     |     | EAEAN | 474 |
| AAD30612.1_AtHex1_A. thaliana  | VSKIVQYGFHGG                          | VRVLPEIDTPGHTGS-WGEAYPEIVTC                              | ----- |     |     |     |       | 279 |
| AAM91092.1_AtHex3_A. thaliana  | AAEIVNYARRRG                          | TEVLAIEIDVPGHALSWGKGYPALWPS                              | ----- |     |     |     |       | 289 |
| BAE99290.1_AtHex3_A. thaliana  | ASEIVREAKMRG                          | INVMAEVDVPGHAESWGTGYDPLWPS                               | ----- |     |     |     |       | 292 |
| AAM13977.1_HexA_A. oryzae      | VRNIVNYARARG                          | IRVPEIDMPSESSSGWKQVDPPEMVTG                              | ----- |     |     |     |       | 290 |
| AAT99455.1_BmGlcNAcase3_B. mor | IQTVIDHARNRG                          | IRVPEFDVPGHTRSWSGVAKPDLTHC                               | ----- |     |     |     |       | 291 |
| AAC60521.1_BmChiGlcNAcase_B. m | IREVVEYGLERG                          | VRVLPEFDAPAEVGEQWQDTG                                    | ----- |     |     |     |       | 314 |
| CCD73477.2_CeHEX-4_C. elegans  | IAKIGKEARENAGFETVFAWDMFDKESEETIRKSKIN | -----                                                    |       |     |     |     | 257   |     |
| AAA34346.2_Hex1_C. albicans    | LKYIVDYARARG                          | VRVLPEIDMPGHARAGWKQVDPTIVEC                              | ----- |     |     |     |       | 274 |
| ADU20405.1_βHex_C. annum       | VEKIVEFGMEHG                          | VRVLPEIDMPAHTGS-WAEAYPEIITC                              | ----- |     |     |     |       | 274 |
| ABB18373.1_CpHEX1_C. posadasii | IRKVIEYARARG                          | IRVVPEIDMPGHSASGWRKIDPDIVAC                              | ----- |     |     |     |       | 285 |
| AAA33230.1_NagA_D. discoideum  | IQEVVAYAKTYG                          | IRVPEEDIPGHAAAWGIGYPPELVATC                              | ----- |     |     |     |       | 263 |
| AAF46406.1_Hex2_D. melanogaste | ALNLVKYARLRG                          | IRILLIEIDGPPSHAGNGWQWGAAGLGN                             | ----- |     |     |     |       | 344 |
| AAF47881.1_Hex1_D. melanogaste | VAEVVEYGRVRG                          | IRVMPEFDAPAEVGEQWQHKH                                    | ----- |     |     |     |       | 317 |
| AAM29423.1_Fdl_D. melanogaster | VREVAEEFAKIYG                         | VQVPEIDAPAEHAGNGWDWGPGRGMGE                              | ----- |     |     |     |       | 385 |
| CAE46968.1_HexA_E. histolytica | LRELAQYGANRG                          | VIVYGEIDTPAHTASWNLGYPGVVANC                              | ----- |     |     |     |       | 292 |
| AAB00965.1_HexA_H. sapiens     | VKEVIEYARLRG                          | IRVLAEFDTPGHTLSWGPPIGLLTTPC                              | ----- |     |     |     |       | 277 |
| AAA52645.1_HexB_H. sapiens     | VRMVIEYARLRG                          | IRVLPEDFTPGHTLSWKGQKDLLTPC                               | ----- |     |     |     |       | 309 |
| AAC53246.1_HexA_M. musculus    | VKEVIEYARLRG                          | IRVLAEFDTPGHTLSWGPAPGLLTTPC                              | ----- |     |     |     |       | 277 |
| AAA18776.1_HexB_M. musculus    | VRMVLEYARLRG                          | IRVPEFDTPGHTQSWGKGQKNLLTPC                               | ----- |     |     |     |       | 288 |
| ABI81756.1_Hex1_O. furnacalis  | IREVVREGLERG                          | VRVLPEFDAPAEVGEQWQDTG                                    | ----- |     |     |     |       | 312 |
| AEQ33603.1_HexTF_T. flavus     | IKDIEYARARA                           | VRVVPEVDMPGHSAAAGWQVDPSPVAC                              | ----- |     |     |     |       | 315 |
| ACI15900.1_NagA_T. maritima    | VTVMTHAVRYSS                          | TDSLPATLSEKIITDVLREKIG                                   | ----- |     |     |     |       | 237 |
| AAK16587.1_CbsA_T. neapolitana | TAVMTAHVKYPA                          | VDDLPAATLSKKLITEVLREKLN                                  | ----- |     |     |     |       | 237 |
| CAA63123.1_HexB_S. scrofa      | VRMVIEYARIRG                          | IRVMPEFDTPGHSRSWSGKGQKDLLTPC                             | ----- |     |     |     |       | 283 |

\*

|                                | 850                                                                     | 860                           | 870 | 880 | 890 | 900 | 910 |  |
|--------------------------------|-------------------------------------------------------------------------|-------------------------------|-----|-----|-----|-----|-----|--|
| WP_082768773.1_Nah20B_P. hydro | QYLLTEFADKSQYRSIQHYDDN-TTNPCLDSTVYHFDVKVLS                              | ELIKMHNKAGVA-LKRYHIGADETAGAWQ | 558 |     |     |     |     |  |
| WP_068373836.1_Nah20A_P. hydro | -----GPYTMQRHWGVFEPIIDENPQVYQETETIISELAELEP-----                        | DVYVHIGGDEIEPTQW              | 323 |     |     |     |     |  |
| BAD00143.1_Nah20A_A. hydrophil | QFRLTDPADTSNVTSVQFYDKMSFNPCQPGAATSVAKVMDEVAQMHAAGQP-LTAWHYGGDEAKNIMQ    | 544                           |     |     |     |     |     |  |
| BAF76001.1_NahB_A. hydrophila  | --LLVEEADRSRYLSVQYFDDN-VNPPALPGTYRFLDAVMDEVCDLEPGS-----                 | QVHMGGDEV-----                | 419 |     |     |     |     |  |
| BAI94822.1_BbhI_B. bifidum     | FDDYTKGDDPTFDSDTTVHIGADEFLYNTAYRKGTINEIVPYIKDNTNVRMWGGLTWINDHKTEITKDAI  | 793                           |     |     |     |     |     |  |
| AAQ05800.1_Hex20A_C. fimi      | ---PSGE---PTDVYTGIEVGFSRTHDDLPATRPRLRDVFTDLAAMPGE-----                  | YVHIGGDEV-----                | 299 |     |     |     |     |  |
| BAI63641.1_Hex1t_Paenibacillus | ---PDGK---RKAMRTDAGYSTIMPERAEITYQFVEDVISELAATSPSP-----                  | YIHLGGDES-----                | 323 |     |     |     |     |  |
| CAA55582.1_NahA_P. gingivalis  | ---CFPR-EFKPRII---WGVEQDVYCAGKDSVFRITSDVIDEVAPLEPGT-----                | YEHIGGDECPKDRW                | 341 |     |     |     |     |  |
| BAA84281.1_Hex99_P. piscicida  | NRFLRIDPLDQSQYYTPQFYTDNFVNEALESTFTFLNHVVRETRAIDAVPDATLTRLHGGGDELPHLGP   | 600                           |     |     |     |     |     |  |
| BAB84321.1_Hex86_P. piscicida  | ---CHQR---AVKVQPQGFIFEDVLCF-REDVFAFLGVVYKEVAELEPSQ-----                 | YIHIGGDEVIKKQW                | 345 |     |     |     |     |  |
| AAB03808.1_Chb_S. marcescens   | EFRLVDPTDTSNTTSVQFFNRSYFNPCLDSSQRFVDKVGIEAQMHEAGQP-IKTWHFGGDEAKNIRL     | 546                           |     |     |     |     |     |  |
| AAS02154.1_GcnA_S. gordonii    | -----EETRVYDRLRKERVTLVWYDYYQDSEEKYNRN---FQNHKISQDIAFAGG-                | 336                           |     |     |     |     |     |  |
| AAK98861.1_StrH_S. pneumoniae  | -----PQAHFDKVSKT'TMDLKNEEAMNSVKALIGKYMDFEAG---KTKIFNFGTDEYANDAT         | 811                           |     |     |     |     |     |  |
| CAB87223.1_HexA_S. coelicolor  | ---CDGV---APPLYTGTKVGFSTLCVDKDVTYDFVDDVLGELAAALTPGR-----                | YLHIGGDEA-----                | 344 |     |     |     |     |  |
| AAC38798.3_SpHex_S. plicatus   | ---CDGV---APPLYTGTKVGFSTLCVDKDVTYDFVDDVIGELAAALTPGR-----                | YLHIGGDEA-----                | 315 |     |     |     |     |  |
| AKC34128.1_Hex1_uncultured Act | ---CEGE---APALYTGTAVGFSTLCMGKETTFRMDVVLGELAAALTPGP-----                 | YLHIGGDEA-----                | 308 |     |     |     |     |  |
| AKC34129.1_Hex2_uncultured Bac | ---NTDIPGYSKVMTRWGVHPYIFSP-KEETFTFLEDVLSVCDLEPSK-----                   | YIHIGGDEAPKDQW                | 334 |     |     |     |     |  |
| AAC44672.1_ExoI_V. furnissii   | --WLFDEDDQSQYRSIQYYNDN-VTSEALPGTYRFLDCVLEEVAALPSH-----                  | FIHIGADEVP----                | 437 |     |     |     |     |  |
| AAA88682.1_Chb_V. harveyi      | EYRLMDPQDTSNVTTVQFYFNKQSFNPCMESSTRFVDKVISSEVAAHQEAGAP-LTTWHFGGDEAKNIKL  | 543                           |     |     |     |     |     |  |
| AAD30612.1_AtHex1_A. thaliana  | ANMFWWPAGKSWEERLASEPGTGQNLNLSPKTYEVVKNVIQDIVNCEP-----                   | ESFFHGGGDEVIPGCW              | 343 |     |     |     |     |  |
| AAM91092.1_AtHex3_A. thaliana  | -----KNCQEPDVSSTFTEKVIDGILSDFSKIEK-----FKFVHLGGDEVNTTCW                 | 335                           |     |     |     |     |     |  |
| BAE99290.1_AtHex3_A. thaliana  | -----LSCREPLDVTKNFTFEDVISGILADMRLKIEP-----FELFHLGGDEVNTDCW              | 338                           |     |     |     |     |     |  |
| AAM13977.1_HexA_A. oryzae      | TDSWWSNDDWP--LHTAVEPNPGQDIIYNKTYEVVGNVYKELSDIEP-----                    | DHWEHVGGDEIQPNCF              | 352 |     |     |     |     |  |
| AAT99455.1_BmGlcNAcase3_B. mor | YDQDGDY-----VGLGPMNEIKDSTYTLQELFHEVQALEP-----ERYIHHIGGDEVLDLCW          | 343                           |     |     |     |     |     |  |
| AAC60521.1_BmChiGlcNAcase_B. m | LTVCFKAEPPWT---KFCVEPPCGQINPTKEELYDLEDIYVEMAEAES-----TDMFHMGGDEVSERCW   | 376                           |     |     |     |     |     |  |
| CCD73477.2_CeHEX-4_C. elegans  | -----KFIVPVVWGYRTDVTENGYPDGLFERIFNVEDR-----FYVASAFKGADGAR               | 305                           |     |     |     |     |     |  |
| AAA34346.2_Hex1_C. albicans    | ADAFWTD-----AAVEPPPGQDNISEKTYEVISNVYNELSDIEI-----DDVFHVGNDELQEKCY       | 330                           |     |     |     |     |     |  |
| ADU20405.1_βHex_C. annum       | ANMFWWPAGNS--PALAAEPGTGQNLNLPKTYEVVKNVIHDTIAMEP-----DSLEHGGADEINSACW    | 336                           |     |     |     |     |     |  |
| ABB18373.1_CpHEX1_C. posadasii | ADSWWSNDDWE--KHTAVQPNPQGDIIANNKTYKVVEKVYNDISRIET-----DDWEHVGGDELQPNCF   | 347                           |     |     |     |     |     |  |
| AAA33230.1_NagA_D. discoideum  | PDYAAVNN-----IPDDISNPATFTETIQNLFTETIAPLEI-----DNYFHTGGDELVTGCW          | 314                           |     |     |     |     |     |  |
| AAF46406.1_Hex2_D. melanogaste | MSVCLNQSPWR---RFCVQPPCGQNLNLDHMYAVLKEIFEDVAEVGAP-----EETLHMGGDEVFLPCW   | 406                           |     |     |     |     |     |  |
| AAF47881.1_Hex1_D. melanogaste | MTACFNAQPPWK---SFCVEPPCGQDDETVMEMYDVLEDIYGTMFQEN-----PDIFHMGGDEVSTSCW   | 378                           |     |     |     |     |     |  |
| AAM29423.1_Fdl_D. melanogaster | LAMCINQPPWS---FYCGEPPCGQNLNKNYTYLILQRIYEELLQHTGP-----TDFHHLGGDEVNLDWCW  | 447                           |     |     |     |     |     |  |
| CAE46968.1_HexA_E. histolytica | WDYIVSTSMRY-----GENVLSNPANPNTFPIIDALMKELSDTEG-----TDYVHVGGDEVWTSW       | 349                           |     |     |     |     |     |  |
| AAB00965.1_HexA_H. sapiens     | YSGSEPS-----GTFGPVNPSLNNTYEFMSTFFLEVSSVEP-----DFYLHLGGDEVDFTCW          | 329                           |     |     |     |     |     |  |
| AAA52645.1_HexB_H. sapiens     | YSRQNKI-----DSFGPINPTLNTYISLTTFFKEISEVEP-----DQFIHLGGDEVFEFKCW          | 361                           |     |     |     |     |     |  |
| AA53246.1_HexA_M. musculus     | YSGSHLS-----GTFGPVNPSLNNTYEFMSTLFLFLEISSVEP-----DFYLHLGGDEVDFTCW        | 329                           |     |     |     |     |     |  |
| AAA18776.1_HexB_M. musculus    | YNQKTKT-----QVFGPVDETVNTTYAFENTFFKEISSVEP-----DQFIHLGGDEVFEFCW          | 340                           |     |     |     |     |     |  |
| ABI81756.1_Hex1_O. furnacalis  | LTVCFKAEPPWK---SYCVEPPCGQNLNPKDELYQYLEDIYSDMAEVEDT-----TDIFHMGGDEVSEACW | 374                           |     |     |     |     |     |  |
| AEQ33603.1_HexTF_T. flavus     | AHSWWSNDNWP--YHTAVEPTPGQDDELNNKTYGVVEKVYNELSGIET-----DDFFHVGGDELQTCY    | 377                           |     |     |     |     |     |  |
| ACI15900.1_NagA_T. maritima    | -----FDGTVISDAMEMSAVSNFVSVEEIVSL-----FLNAGGNMILLGDY                     | 278                           |     |     |     |     |     |  |
| AAK16587.1_CbsA_T. neapolitana | -----FKGVLSDAMEMKAISENFSVEEAVRF-----FIEAGGNMILLDNF                      | 278                           |     |     |     |     |     |  |
| CAA63123.1_HexB_S. scrofa      | YRKQVLS-----GTFGPINPTLNTTYNLSKFFKEISTVEP-----DEFIHIGGDEVDFDCW           | 335                           |     |     |     |     |     |  |

\*



|                                | 990                                                                   | 1000                       | 1010                    | 1020                            | 1030                  | 1040 | 1050 |     |
|--------------------------------|-----------------------------------------------------------------------|----------------------------|-------------------------|---------------------------------|-----------------------|------|------|-----|
| WP_082768773.1_Nah20B_P. hydro | E-----                                                                | AAAWDDGLSHAKAD--Q-----     |                         |                                 | LPQVQANITGGLPSNG----- |      |      | 629 |
| WP_068373836.1_Nah20A_P. hydro | Q-----                                                                | MMGWDEVFATDLPKDIVV-----    |                         | QSWRGLDSLQHIASSDYQVLLSTGGYVDQPO |                       |      |      | 411 |
| BAD00143.1_Nah20A_A. hydrophil | ST-----                                                               | LQAWEDGLKYATDASVF-----     |                         | ATDKTRVNFWEETLYWGG-----         |                       |      |      | 649 |
| BAF76001.1_NahB_A. hydrophila  | Q-----                                                                | MLGWEEILHG-----            |                         | DKVSREATVFAWTS-----             |                       |      |      | 486 |
| BAI94822.1_BbhI_B. bifidum     | YQAVPSGDDQMLGAFAIWSDNIDKSASGLTESDLYWRFFDAMPFYAEKTWAATGKEKGTAAKLTALAAK |                            |                         |                                 |                       |      |      | 933 |
| AAQ05800.1_Hex20A_C. fimi      | K-----                                                                | VVGWQ-EISSTP-----          |                         | LEPGTVVQYWDINADPAP-----         |                       |      |      | 353 |
| BAI63641.1_Hex1t_Paenibacillus | K-----                                                                | VVGWDPSTSSG-----           |                         | ATSDSVLQNWTCASSTG-----          |                       |      |      | 377 |
| CAA55582.1_NahA_P. gingivalis  | R-----                                                                | LIGWD-EILEGG-----          |                         | LAPSATVMWSRGEDGG-----           |                       |      |      | 407 |
| BAA84281.1_Hex99_P. piscicida  | D-----                                                                | MATWGDVLSHNGTGNVSY-----    |                         | GEIYPVFWNNVWGWGNEH-----         |                       |      |      | 678 |
| BAB84321.1_Hex86_P. piscicida  | T-----                                                                | VIGWD-EILEGG-----          |                         | VADDAVIMSWRGTEGG-----           |                       |      |      | 411 |
| AAB03808.1_Chb_S. marcescens   | DR-----                                                               | MQAWDGLKDAESSKAF-----      |                         | ATSRVGVNFWDITLYWGG-----         |                       |      |      | 646 |
| AAS02154.1_GcnA_S. gordonii    | K-----                                                                | EVIVTGWGDNGGETSQFSVLP----- |                         | ALQIWAELAYRN-----               |                       |      |      | 400 |
| AAK98861.1_StrH_S. pneumoniae  | QP-----                                                               | MAFNDGFFYEDKDDVQFD-----    |                         | KDVLISYWSKGWGWYN-----           |                       |      |      | 880 |
| CAB87223.1_HexA_S. coelicolor  | T-----                                                                | VVGWH-QLAGAE-----          |                         | PVEGALVQYWGDLRTSDAE-----        |                       |      |      | 399 |
| AAC38798.3_SpHex_S. plicatus   | T-----                                                                | VVGWH-QLAGAE-----          |                         | PVEGALVQYWGDLRTGDAE-----        |                       |      |      | 370 |
| AKC34128.1_Hex1_uncultured Act | T-----                                                                | VVGWG-EIAQAP-----          |                         | LTPGTMVQHWRODLT-----            |                       |      |      | 359 |
| AKC34129.1_Hex2_uncultured Bac | N-----                                                                | LIGWD-EIQEGG-----          |                         | LPKTATMMVTRDAKWA-----           |                       |      |      | 400 |
| AAC44672.1_ExoI_V. furnissii   | R-----                                                                | MVGWEEAQHG-----            |                         | DKVSKDTVIYSWLS-----             |                       |      |      | 504 |
| AAA88682.1_Chb_V. harveyi      | PN-----                                                               | FQAWQDGLKYSDEKAF-----      |                         | ATENTRVNFWDVLYWGG-----          |                       |      |      | 645 |
| AAD30612.1_AtHex1_A. thaliana  |                                                                       | TVVYWEDVLLDAQIKADPS-----   |                         | VLPKEHTILOTNNGPEN-----          |                       |      |      | 416 |
| AAM91092.1_AtHex3_A. thaliana  | I-----                                                                | INWEETFINFGSKLNR-----      |                         | KTVVHNWLNLTG-----               |                       |      |      | 401 |
| BAE99290.1_AtHex3_A. thaliana  | P-----                                                                | VNWEETFSFGKDLDP-----       |                         | RTVIQNWLVSD-----                |                       |      |      | 404 |
| AAM13977.1_HexA_A. oryzae      | E-----                                                                | RRIVMWEDIALS-ADNAH-----    |                         | DVP-KNIVMQSWNNGLEY-----         |                       |      |      | 425 |
| AAT99455.1_BmGlcNAcase3_B. mor | R-----                                                                | PIVWQEVFDEGVPLPK-----      |                         | DTIVQVWKENE-----                |                       |      |      | 408 |
| AAC60521.1_BmChiGlcNAcase_B. m | K-AFGKR-----                                                          | LPLILWTSTLTDTYTHVEKFL----- |                         | DKD-EYIIQVWTTGADP-----          |                       |      |      | 456 |
| CCD73477.2_CeHEX-4_C. elegans  | KVDG-----                                                             | IFVTGWSRFNHFN-----         |                         |                                 |                       |      |      | 351 |
| AAA34346.2_Hex1_C. albicans    |                                                                       | RKLTWDDVLLS-DVSAD-----     |                         | KIP-SNITLQVWH-EISG-----         |                       |      |      | 393 |
| ADU20405.1_βHex_C. annum       |                                                                       | TVVYWEDVILSANVKVDPS-----   |                         | LLSPQHVMQTNNGPSN-----           |                       |      |      | 409 |
| ABB18373.1_CpHEX1_C. posadasii | N-----                                                                | RRLLMWEDVLLSGNMHAH-----    |                         | RVP-RDIIMQSWNNGGLAN-----        |                       |      |      | 420 |
| AAA33230.1_NagA_D. discoideum  | TK-----                                                               | ITWNDPIDYGVQLNPE-----      |                         | TLVQVWSSGS-----                 |                       |      |      | 379 |
| AAF46406.1_Hex2_D. melanogaste | EINERMPGIKEPKSVIIWSSHLTNPRYIETYL-----                                 |                            | PKE--RFIIQTWVESQDA----- |                                 |                       |      |      | 493 |
| AAF47881.1_Hex1_D. melanogaste | KVANGTH-----                                                          | TPIILWTSGLTEEPFIDEYL-----  |                         | NPE--RYIIQIWTGVDP-----          |                       |      |      | 459 |
| AAM29423.1_Fdl_D. melanogaster | LANNGVAP-----                                                         | KHVAVWSSALTN---TKRL-----   |                         | PNS--QFTVQVWGGSTWQ-----         |                       |      |      | 512 |
| CAE46968.1_HexA_E. histolytica | HP-----                                                               | VVWEEVFKKG-NADKN-----      |                         | TIIQVWDDIR-----                 |                       |      |      | 417 |
| AAB00965.1_HexA_H. sapiens     | KG-----                                                               | YVWQEVFNDKNVKIQP-----      |                         | DTIIQVWREDIPVN-Y-----           |                       |      |      | 400 |
| AAA52645.1_HexB_H. sapiens     | KG-----                                                               | SIVWQEVFDDKAKLAP-----      |                         | GTIVEVWKDSA---Y-----            |                       |      |      | 429 |
| AAC53246.1_HexA_M. musculus    | KG-----                                                               | YVWQEVFNDKNVKVRP-----      |                         | DTIIQVWREEMPVE-Y-----           |                       |      |      | 399 |
| AAA18776.1_HexB_M. musculus    | KN-----                                                               | SIVWQEVFDDKVELQP-----      |                         | GTVVEVWKSEH-----Y-----          |                       |      |      | 408 |
| ABI81756.1_Hex1_O. furnacalis  | K-AFGKK-----                                                          | LPLILWTSTLTNYKHIDDYL-----  |                         | NKD--DYIIQVWTTGVDP-----         |                       |      |      | 454 |
| AEQ33603.1_HexTF_T. flavus     |                                                                       | RKLVIWEDLIIN-NPHAP-----    |                         | NVSTENLLVQSWNNGLTN-----         |                       |      |      | 450 |
| ACI15900.1_NagA_T. maritima    | S-----                                                                | IRTVEKYLAFAKKNSGVG-----    |                         | FLADVSMKAVEFLG-----             |                       |      |      | 337 |
| AAK16587.1_CbsA_T. neapolitana | S-----                                                                | IKIVDEYLSALENRFNSG-----    |                         | LIAEVAERAIECTR-----             |                       |      |      | 337 |
| CAA63123.1_HexB_S. scrofa      | KR-----                                                               | PIVWQEAFFDRDKFMP-----      |                         | GTVVQVWKIED---Y-----            |                       |      |      | 403 |

|                                | 1060                                                                  | 1070 | 1080 | 1090 | 1100 | 1110 | 1120 |
|--------------------------------|-----------------------------------------------------------------------|------|------|------|------|------|------|
|                                | ..... ..... ..... ..... ..... ..... ..... .....                       |      |      |      |      |      |      |
| WP_082768773.1_Nah20B_P. hydro | -----                                                                 |      |      |      |      |      | 629  |
| WP_068373836.1_Nah20A_P. hydro | EAAYHYRNDPFTSFQPSFKTQDIKW-----                                        |      |      |      |      |      | 438  |
| BAD00143.1_Nah20A_A. hydrophil | -----                                                                 |      |      |      |      |      | 649  |
| BAF76001.1_NahB_A. hydrophila  | -----                                                                 |      |      |      |      |      | 486  |
| BAI94822.1_BbhI_B. bifidum     | QGTGPRTPNPYYQATSKNSVYESYDFNDGLADASGNRDLTIGDGSKAAVKDQSLKLAGSSYATSKLDKL |      |      |      |      |      | 1003 |
| AAQ05800.1_Hex20A_C. fimi      | -----                                                                 |      |      |      |      |      | 353  |
| BAI63641.1_Hex1t_Paenibacillus | -----                                                                 |      |      |      |      |      | 377  |
| CAA55582.1_NahA_P. gingivalis  | -----                                                                 |      |      |      |      |      | 407  |
| BAA84281.1_Hex99_P. piscicida  | -----                                                                 |      |      |      |      |      | 678  |
| BAB84321.1_Hex86_P. piscicida  | -----                                                                 |      |      |      |      |      | 411  |
| AAB03808.1_Chb_S. marcescens   | -----                                                                 |      |      |      |      |      | 646  |
| AAS02154.1_GcnA_S. gordonii    | -----                                                                 |      |      |      |      |      | 400  |
| AAK98861.1_StrH_S. pneumoniae  | -----                                                                 |      |      |      |      |      | 880  |
| CAB87223.1_HexA_S. coelicolor  | -----                                                                 |      |      |      |      |      | 399  |
| AAC38798.3_SpHex_S. plicatus   | -----                                                                 |      |      |      |      |      | 370  |
| AKC34128.1_Hex1_uncultured Act | -----                                                                 |      |      |      |      |      | 359  |
| AKC34129.1_Hex2_uncultured Bac | -----                                                                 |      |      |      |      |      | 400  |
| AAC44672.1_ExoI_V. furnissii   | -----                                                                 |      |      |      |      |      | 504  |
| AAA88682.1_Chb_V. harveyi      | -----                                                                 |      |      |      |      |      | 645  |
| AAD30612.1_AtHex1_A. thaliana  | -----                                                                 |      |      |      |      |      | 416  |
| AAM91092.1_AtHex3_A. thaliana  | -----                                                                 |      |      |      |      |      | 401  |
| BAE99290.1_AtHex3_A. thaliana  | -----                                                                 |      |      |      |      |      | 404  |
| AAM13977.1_HexA_A. oryzae      | -----                                                                 |      |      |      |      |      | 425  |
| AAT99455.1_BmGlcNAcase3_B. mor | -----                                                                 |      |      |      |      |      | 408  |
| AAC60521.1_BmChiGlcNAcase_B. m | -----                                                                 |      |      |      |      |      | 456  |
| CCD73477.2_CeHEX-4_C. elegans  | -----                                                                 |      |      |      |      |      | 351  |
| AAA34346.2_Hex1_C. albicans    | -----                                                                 |      |      |      |      |      | 393  |
| ADU20405.1_βHex_C. annuum      | -----                                                                 |      |      |      |      |      | 409  |
| ABB18373.1_CpHEX1_C. posadasii | -----                                                                 |      |      |      |      |      | 420  |
| AAA33230.1_NagA_D. discoideum  | -----                                                                 |      |      |      |      |      | 379  |
| AAF46406.1_Hex2_D. melanogaste | -----                                                                 |      |      |      |      |      | 493  |
| AAF47881.1_Hex1_D. melanogaste | -----                                                                 |      |      |      |      |      | 459  |
| AAM29423.1_Fdl_D. melanogaster | -----                                                                 |      |      |      |      |      | 512  |
| CAE46968.1_HexA_E. histolytica | -----                                                                 |      |      |      |      |      | 417  |
| AAB00965.1_HexA_H. sapiens     | -----                                                                 |      |      |      |      |      | 400  |
| AAA52645.1_HexB_H. sapiens     | -----                                                                 |      |      |      |      |      | 429  |
| AAC53246.1_HexA_M. musculus    | -----                                                                 |      |      |      |      |      | 399  |
| AAA18776.1_HexB_M. musculus    | -----                                                                 |      |      |      |      |      | 408  |
| ABI81756.1_Hex1_O. furnacalis  | -----                                                                 |      |      |      |      |      | 454  |
| AEQ33603.1_HexTF_T. flavus     | -----                                                                 |      |      |      |      |      | 450  |
| ACI15900.1_NagA_T. maritima    | -----                                                                 |      |      |      |      |      | 337  |
| AAK16587.1_CbsA_T. neapolitana | -----                                                                 |      |      |      |      |      | 337  |
| CAA63123.1_HexB_S. scrofa      | -----                                                                 |      |      |      |      |      | 403  |

|                                | 1130                                            | 1140   | 1150  | 1160 | 1170 | 1180  | 1190                        |
|--------------------------------|-------------------------------------------------|--------|-------|------|------|-------|-----------------------------|
| WP_082768773.1 Nah20B_P. hydro | ..... ..... ..... ..... ..... ..... ..... ..... |        |       |      |      |       |                             |
| WP_068373836.1 Nah20A_P. hydro | -----FDR                                        | AHDFVN | RGWD  | TVLS | SFPD | VLMF  | DFPYQAD                     |
| BAD00143.1 Nah20A_A. hydrophil | -----QHW                                        | QFTMP  | RLKGS | SAVS | GEFV | LLSSE | AGKQVLLRFN                  |
| BAF76001.1 NahB_A. hydrophila  | -----FNE                                        | AMKWA  | HKG   | YDV  | VL   | SNPD  | LYLMFDFPNEVH                |
| BAI94822.1 BbhI_B. bifidum     | -----FQ                                         | AGLDAA | ASG   | YPV  | VM   | APQH  | YMLDLAWSQD                  |
| AAQ05800.1 Hex20A_C. fimi      | -----FV                                         | AAQA   | CAH   | VLM  | SPGS | RAYL  | DMKYDA                      |
| BAI63641.1 Hex1t_Paenibacillus | -----TA                                         | AKAG   | MKV   | IV   | SPAN | AYL   | DMKYYS                      |
| CAA55582.1 NahA_P. gingivalis  | -----IA                                         | ANM    | NHD   | V    | MT   | PGS   | GGLYLDHYQG                  |
| BAA84281.1 Hex99_P. piscicida  | -----Q                                          | AYK    | FAN   | Q    | CHK  | V     | LAHATNL                     |
| BAB84321.1 Hex86_P. piscicida  | -----I                                          | QAKM   | G     | HO   | V    | IS    | PIYQYIFDAYQS                |
| AAB03808.1 Chb_S. marcescens   | -----F                                          | D      | SVND  | WANK | G    | YEV   | VVSNPDYVLMDFPYEVN           |
| AAS02154.1 GcnA_S. gordonii    | -----D                                          | LKKV   | SEH   | FL   | V    | STGL  | DFDDEMKIDLANLLP             |
| AAK98861.1 StrH_S. pneumoniae  | -----L                                          | ASPQ   | YL    | ASK  | G    | YK    | FLNTNGDWYVIGNHKQDEAYPLSKAVE |
| CAB87223.1 HexA_S. coelicolor  | -----K                                          | AQV    | AAAA  | ARN  | G    | TGL   | ILSPADRTYLD                 |
| AAC38798.3 SpHex_S. plicatus   | -----K                                          | A      | EVAE  | AA   | R    | N     | G                           |
| AKC34128.1 Hex1_uncultured Act | -----P                                          | QAA    | S     | CH   | K    | V     | ILSPAGKTYLD                 |
| AKC34129.1 Hex2_uncultured Bac | -----K                                          | H      | ALS   | L    | G    | N     | N                           |
| AAC44672.1 ExoI_V. furnissii   | -----E                                          | Q      | A     | L    | N    | C     | A                           |
| AAA88682.1 Chb_V. harveyi      | -----T                                          | S      | S     | V    | Y    | E     | W                           |
| AAD30612.1 AtHex1_A. thaliana  | -----T                                          | K      | R     |      |      |       |                             |
| AAM91092.1 AtHex3_A. thaliana  | -----L                                          | V      | E     | N    | V    | T     | A                           |
| BAE99290.1 AtHex3_A. thaliana  | -----I                                          | C      | Q     | A    | V    | A     | K                           |
| AAM13977.1 HexA_A. oryzae      | -----I                                          | S      | N     |      |      |       |                             |
| AAT99455.1 BmGlcNAcase3_B. mor | -----A                                          | P      | E     | M    | L    | N     | I                           |
| AAC60521.1 BmChiGlcNAcase_B. m | -----Q                                          | I      | Q     | G    | L    | L     | Q                           |
| CCD73477.2 CeHEX-4_C. elegans  | -----A                                          | L      | C     | E    | L    | L     | P                           |
| AAA34346.2 Hex1_C. albicans    | -----V                                          | K      | N     |      |      |       |                             |
| ADU20405.1 βHex_C. annum       | -----T                                          | K      | Q     |      |      |       |                             |
| ABB18373.1 CpHEX1_C. posadasii | -----I                                          | K      | K     |      |      |       |                             |
| AAA33230.1 NagA_D. discoideum  | -----D                                          | L      | Q     | G    | I    | V     | N                           |
| AAF46406.1 Hex2_D. melanogaste | -----L                                          | N      | R     | E    | L    | L     | Q                           |
| AAF47881.1 Hex1_D. melanogaste | -----K                                          | V      | K     | K    | I    | L     | E                           |
| AAM29423.1 Fd1_D. melanogaster | -----E                                          | N      | Y     | D    | L    | L     | D                           |
| CAE46968.1 HexA_E. histolytica | -----L                                          | L      | Q     | V    | V    | N     | S                           |
| AAB00965.1 HexA_H. sapiens     | -----M                                          | K      | E     | L    | V    | T     | K                           |
| AAA52645.1 HexB_H. sapiens     | -----P                                          | E      | E     | L    | S    | R     | V                           |
| AAC53246.1 HexA_M. musculus    | -----M                                          | L      | E     | M    | Q    | D     | I                           |
| AAA18776.1 HexB_M. musculus    | -----S                                          | Y      | E     | L    | K    | Q     | V                           |
| ABI81756.1 Hex1_O. furnacalis  | -----Q                                          | I      | K     | G    | L    | L     | E                           |
| AEQ33603.1 HexTF_T. flavus     | -----I                                          | N      | N     |      |      |       |                             |
| ACI15900.1 NagA_T. maritima    | -----F                                          | E      | K     | I    | D    | H     | T                           |
| AAK16587.1 CbsA_T neapolitana  | -----M                                          | R      | K     | E    | L    | L     | G                           |
| CAA63123.1 HexB_S. scrofa      | -----K                                          | W      | E     | Q    | S    | L     | I                           |

|                                | 1200                                            | 1210        | 1220      | 1230         | 1240      | 1250      | 1260          |                  |
|--------------------------------|-------------------------------------------------|-------------|-----------|--------------|-----------|-----------|---------------|------------------|
| WP_082768773.1_Nah20B_P. hydro | ..... ..... ..... ..... ..... ..... ..... ..... |             |           |              |           |           |               | 705              |
| WP_068373836.1_Nah20A_P. hydro | -----PKEPGYYW                                   | -----GMRSID | -----SFKV | -----QFMPDNL | -----PAHA | -----EFTW | -----DAIGNDYQ | STE 705          |
| BAD00143.1_Nah20A_A. hydrophil | RANLQRF                                         | TV-----     | DSWMGPS   | QFELD        | LDL       | SKD       | VIQ           | QGRILIGNTP 550   |
| BAF76001.1_NahB_A. hydrophila  | -----PA                                         | ERGGY       | WATRE     | NDTRK        | VFA       | FAPEN     | LPQNA         | ETSVDRDGN 725    |
| BAI94822.1_BbhI_B. bifidum     | -----I                                          | HEPGL       | YAG-      | TLN          | LAQ       | VHAC      | DP---         | APADFHANDN 549   |
| AAQ05800.1_Hex20A_C. fimi      | QQT                                             | TKLY        | V         | D            | G         | E         | F             | VSDATGKYIDK 1143 |
| BAI63641.1_Hex1t_Paenibacillus | -----T                                          | TELC        | LEW       | AG-          | H         | IELR      | DA            | MDWEP-STL 410    |
| CAA55582.1_NahA_P. gingivalis  | -----D                                          | SPIC        | L         | Q            | W         | RG-       | F             | VNTNRA           |
| BAA84281.1_Hex99_P. piscicida  | -----D                                          | P           | T         | V            | E         | P         | V             | AIGG-YAP 465     |
| BAB84321.1_Hex86_P. piscicida  | -----D                                          | E           | I         | C            | Y         | H         | W             | AG-YTDT 751      |
| AAB03808.1_Chb_S. marcescens   | -----R                                          | N           | L         | D            | E         | P         | K             | AIHG-L 468       |
| AAS02154.1_GcnA_S. gordonii    | -----P                                          | D           | E         | R            | G         | Y         | Y             | W                |
| AAK98861.1_StrH_S. pneumoniae  | -----D                                          | L           | P         | D            | N         | L         | S             | G                |
| CAB87223.1_HexA_S. coelicolor  | -----N                                          | S           | G         | K            | V         | P         | F             | N                |
| AAC38798.3_SpHex_S. plicatus   | -----D                                          | T           | P         | L            | G         | L         | S             | W                |
| AKC34128.1_Hex1_uncultured Act | -----D                                          | T           | P         | L            | G         | L         | S             | W                |
| AKC34129.1_Hex2_uncultured Bac | -----A                                          | T           | P         | F            | C         | L         | S             | W                |
| AAC44672.1_ExoI_V. furnissii   | -----A                                          | K           | G         | V            | E         | Y         | E             | A                |
| AAA88682.1_Chb_V. harveyi      | -----P                                          | E           | E         | P            | G         | V         | D             | W                |
| AAD30612.1_AtHex1_A. thaliana  | -----P                                          | K           | E         | R            | G         | Y         | Y             | W                |
| AAM91092.1_AtHex3_A. thaliana  | -----K                                          | E           | S         | G            | -----     | G         | G             | S                |
| BAE99290.1_AtHex3_A. thaliana  | -----A                                          | P           | W         | Q            | G         | F         | Y             | A                |
| AAM13977.1_HexA_A. oryzae      | -----V                                          | P           | W         | E            | V         | Y         | N             | T                |
| AAT99455.1_BmGlcNAcase3_B. mor | AN-----                                         | P           | D         | A            | N         | -----     | P             | N                |
| AAC60521.1_BmChiGlcNAcase_B. m | -----T                                          | G           | D         | W            | T         | E         | F             | N                |
| CCD73477.2_CeHEX-4_C. elegans  | -----G                                          | N           | N         | W            | C         | S         | P             | Y                |
| AAA34346.2_Hex1_C. albicans    | ET-----                                         | P           | E         | N            | V         | D         | -----         | F                |
| ADU20405.1_βHex_C. annum       | PG-----                                         | T           | D         | Q            | G         | N         | -----         | G                |
| ABB18373.1_CpHEX1_C. posadasii | EN-----                                         | P           | D         | P            | E         | T         | -----         | P                |
| AAA33230.1_NagA_D. discoideum  | -----N                                          | I           | H         | Y            | E         | W         | Q             | D                |
| AAF46406.1_Hex2_D. melanogaste | -----Y                                          | Y           | N         | W            | R         | T         | V             | Y                |
| AAF47881.1_Hex1_D. melanogaste | -----G                                          | N           | N         | W            | C         | S         | P             | Y                |
| AAM29423.1_Fdl_D. melanogaster | -----G                                          | D           | A         | A            | C         | A         | Q             | Y                |
| CAE46968.1_HexA_E. histolytica | -----C                                          | V           | N         | T            | H         | S         | M             | W                |
| AAB00965.1_HexA_H. sapiens     | -----Y                                          | G           | P         | D            | W         | K         | D             | F                |
| AAA52645.1_HexB_H. sapiens     | -----Y                                          | G           | Q         | D            | W         | R         | K             | Y                |
| AAC53246.1_HexA_M. musculus    | -----Y                                          | G           | P         | D            | W         | K         | D             | M                |
| AAA18776.1_HexB_M. musculus    | -----Y                                          | G           | Q         | D            | W         | K         | N             | Y                |
| ABI81756.1_Hex1_O. furnacalis  | -----G                                          | N           | N         | W            | C         | S         | P             | Y                |
| AEQ33603.1_HexTF_T. flavus     | VN-----                                         | P           | D         | A            | V         | D         | G             | L                |
| ACI15900.1_NagA_T. maritima    | -----G                                          | G           | D         | Y            | D         | Q         | I             | P                |
| AAK16587.1_CbsA_T. neapolitana | -----G                                          | D           | D         | Y            | D         | L         | I             | P                |
| CAA63123.1_HexB_S. scrofa      | -----Y                                          | G           | Q         | D            | W         | K         | N             | Y                |

|                                | 1270      | 1280        | 1290       | 1300          | 1310       | 1320         | 1330                   |      |
|--------------------------------|-----------|-------------|------------|---------------|------------|--------------|------------------------|------|
| WP_082768773.1_Nah20B_P. hydro | KVS----   | LQNQAKVSGIQ | AQLWSETVRS | DDSDSANYMLEP  | ----       | RLIAFAERAWFK | PEWAVAYQAGQT           | 763  |
| WP_068373836.1_Nah20A_P. hydro | SKVPTDL   | PKLHKNIIG   | GEAAIWSEIV | -RADNLDLRLWP  | ----       | RLVATAERLWS  | PATLTDEDAMYRR          | 611  |
| BAD00143.1_Nah20A_A. hydrophil | DQ-----   | DPVKFKCIS   | GQOWSETVRT | DAQEYEMVYP    | ----       | RIFVAERAWHK  | GGFELD YVKGRE          | 780  |
| BAF76001.1_NahB_A. hydrophila  | -----     | IIGVLSPLW   | SELITSRDL  | YMLEP         | ----       | RMLATAEVAWS  | T PARKVWEH             | 594  |
| BAI94822.1_BbhI_B. bifidum     | KSCWTGTTN | SETQYNDTE   | GLLR YAFD  | NNPSTI WHSN   | WKGATDKLT  | GSNSFYAE     | IDMCQKYTINQFSF         | 1210 |
| AAQ05800.1_Hex20A_C. fimi      | -----     | PESVIGVEA   | AVWTEITL   | DLGELTSMLEP   | ----       | RLAAVAEVAWT  | APQDRDWDDFSG           | 461  |
| BAI63641.1_Hex1t_Paenibacillus | -----     | NIYGVES     | TLWTEITF   | VTQDHLDYMLYP  | ----       | KLLSNAE      | VGWTARGDRNWDDFKE       | 480  |
| CAA55582.1_NahA_P. gingivalis  | -----     | HRVVLGA     | QANLWAEY   | LYTSERYDYQAYP | ----       | RLIAVAELTWT  | PLAKKDFADFCR           | 516  |
| BAA84281.1_Hex99_P. piscicida  | VLLSEAG-- | KQNVQCIQ    | AQLFGENQ   | KSP EILDYMTF  | ----       | KL LGAAERAW  | VQDMPAQGAATTEA         | 810  |
| BAB84321.1_Hex86_P. piscicida  | -----     | QAFIVGA     | QSGALWTE   | YIKTPRHA      | EYMLEP     | RLSATAETLWS  | DKTQKSWSDYSQY          | 520  |
| AAB03808.1_Chb_S. marcescens   | DK-----   | PWPGAY      | AGLSAEY    | TKRDPQMEYMLFP | ----       | RALSVAERS    | SWHRAGWEQDYRAGRE       | 777  |
| AAS02154.1_GcnA_S. gordonii    | -----     | KQHFASSA    | QQLGELT    | SKRAGEYAYIFET | ----       | QAQLNALLALK  | ISITSGIQKAYRNGD        | 517  |
| AAK98861.1_StrH_S. pneumoniae  | ELMTAFADH | NKDYFRAN    | YNALREEL   | AKIPTNLE      | GYSKESLEAL | DAKTALN      | YNLNRNKQAE             | 1035 |
| CAB87223.1_HexA_S. coelicolor  | -----     | AEAVRCV     | EAPLWTEI   | LSDPDQLDFMAFP | ----       | RLPGVAELGWS  | PASTHDWD TYKV          | 510  |
| AAC38798.3_SpHex_S. plicatus   | -----     | ADAVRCV     | EAPLWTEI   | LSDPDQLDYMAFP | ----       | RLPGVAELGWS  | PASTHDWD TYKV          | 481  |
| AKC34128.1_Hex1_uncultured Act | -----     | EDAVAGV     | EAPLWTEI   | PTFAEA        | EFMLEP     | RLIAVAELGWS  | PAGRTWDEFRS            | 466  |
| AKC34129.1_Hex2_uncultured Bac | -----     | EKQIIGT     | QALWSEYF   | KDMKKVEYHAF   | ----       | RIAAAEVAWT   | PLALKNFDGFSK           | 514  |
| AAC44672.1_ExoI_V. furnissii   | -----     | IIGIQCAL    | WCEL VNN   | QDRMDYMIYP    | ----       | RLTALAGS     | GLDT                   | 607  |
| AAA88682.1_Chb_V. harveyi      | EI-----   | EAKPFY      | GLSAQLW    | SETVRNDE      | QY EYMVEP  | RVIAAAQ      | RAWHRADWENDYKVGVE      | 776  |
| AAD30612.1_AtHex1_A. thaliana  | -----     | VIGGEV      | ALWSEQA    | -DSTVLD       | SRLWP      | RASATAESLWS  | GNRD-ERGVKRCGEA        | 537  |
| AAM91092.1_AtHex3_A. thaliana  | -----     | VIGGEV      | CMWGEHI    | -DASDIE       | QTIWP      | RAAAAERLWT   | PYAKLAKNPNNVTT         | 499  |
| BAE99290.1_AtHex3_A. thaliana  | -----     | VIGGEV      | CMWGETA    | -DTSVVL       | QTIWP      | RAAAAERMW    | STREAVSKGNITLTAL       | 503  |
| AAM13977.1_HexA_A. oryzae      | -----     | IIGATAP     | LWGEQV     | -DDINV        | SSMEWP     | RAAATAELVWS  | GNRD-ANGNKRTTEM        | 557  |
| AAT99455.1_BmGlcNAcase3_B. mor | -----     | IVGGEAC     | MWAEV      | -DDMNIM       | SRVWP      | RASAVAERLWG  | -HESQATYQVHC           | 508  |
| AAC60521.1_BmChiGlcNAcase_B. m | -----     | IIGGEV      | ALWSEQS    | -DPATLD       | GRLWP      | RAAABAERMW   | AEPSTAWQDAEH           | 563  |
| CCD73477.2_CeHEX-4_C. elegans  | -----     | ILAE        | STVHGCK    | FPGADV        | FEIIMHD    | WKRAVD       | RRIFGKPDQQPSPDSEAEILKN | 451  |
| AAA34346.2_Hex1_C. albicans    | -----     | VIGREAA     | LWSEQV     | -DSTVLT       | TKIWP      | RTAATAELTWS  | GNKD-SNGHHRGYEF        | 520  |
| ADU20405.1_βHex_C. annum       | -----     | VIGGEV      | ALWSEQA    | -DSTVMD       | SRLWP      | RASAMAETLWS  | GNCD-ETGMKRYAEA        | 533  |
| ABB18373.1_CpHEX1_C. posadasii | -----     | VIGATAP     | LWSEQA     | -DDVVIS       | NKMWP      | RAAATAELVWS  | GNVG-KDGKKRTTLM        | 552  |
| AAA33230.1_NagA_D. discoideum  | -----     | IIGGEAT     | MWAEQI     | -NQVNWD       | VRVWP      | RAIGTAERLWS  | AQSVNSVSLALP           | 481  |
| AAF46406.1_Hex2_D. melanogaste | -----     | VIGGEV      | CMWSEYV    | -DONSLE       | SRLWP      | RACAAAERMW   | SNPKSSALLAQR           | 590  |
| AAF47881.1_Hex1_D. melanogaste | -----     | VIGCAE      | GAIWSEQI   | -DEHTLD       | NREWP      | RASATAERLWS  | NPAEGWRQAES            | 566  |
| AAM29423.1_Fdl_D. melanogaster | -----     | VIGGEV      | CMWTEQV    | -DENQLD       | NRLWP      | RTAATAERLWT  | DPDDHDMDIVPPDV         | 626  |
| CAE46968.1_HexA_E. histolytica | -----     | VIGGEC      | CSWGEST    | -DEQNFF       | DRVEQ      | RYSAATAERLWS | KESVVDKESHEV           | 529  |
| AAB00965.1_HexA_H. sapiens     | -----     | VIGGEAC     | MWGEYV     | -DNTNLV       | PRLWP      | RACAVAERLWS  | NKLTSDLT FAYE          | 498  |
| AAA52645.1_HexB_H. sapiens     | -----     | FIGGEAC     | LWGEYV     | -DATNLT       | PRLWP      | RASAVGERLWS  | SKDVRDMDDAYD           | 527  |
| AA53246.1_HexA_M. musculus     | -----     | VIGGEAC     | MWGEYV     | -DSTNLV       | PRLWP      | RACAVAERLWS  | SNLTNIDFAFK            | 497  |
| AAA18776.1_HexB_M. musculus    | -----     | VIGGEAC     | LWGEYV     | -DATNLT       | PRLWP      | RASAVGERLWS  | PKTVDLENAYK            | 506  |
| ABI81756.1_Hex1_O. furnacalis  | -----     | VIGGEAA     | LWSEQS     | -DTSTLD       | GRLWP      | RAAATAERLW   | AEPATSWQDAEY           | 561  |
| AEQ33603.1_HexTF_T. flavus     | -----     | VKCAVAP     | LWSEQV     | -DDTVIS       | GKMWP      | RAAATAELVWS  | GNKDPKTGDKRTTYM        | 585  |
| ACI15900.1_NagA_T. maritima    | -----     | FVEGD       | LIFDFVAD   | IP-NEK        | ALKA       | HLSLPAEKT    | VYFVLRNPFVRYFE         | 439  |
| AAK16587.1_CbsA_T. neapolitana | -----     | DVDGEL      | IFDFV      | VNASKNEQV     | LQA        | HLSLPSDRT    | IYFIIRNPFDAKFFP        | 440  |
| CAA63123.1_HexB_S. scrofa      | -----     | VIGGEAC     | LWGEYV     | -DATNLT       | PRLWP      | RASAVGERLWS  | HKDVRDIHDAYS           | 501  |

|                                | 1340  | 1350                           | 1360                             | 1370                           | 1380   | 1390  | 1400  |  |
|--------------------------------|-------|--------------------------------|----------------------------------|--------------------------------|--------|-------|-------|--|
| WP_082768773.1_Nah20B_P. hydro | ..... | .....                          | .....                            | .....                          | .....  | ..... | ..... |  |
| WP_068373836.1_Nah20A_P. hydro | ----- | YSRDSKLFTELKQQQMYQDWAQFSQTMG   | SQILTDLARDEVLFRLPTPGAKIKQGWLHANS | MF                             | 826    |       |       |  |
| BAD00143.1_Nah20A_A. hydrophil | ----- | LTVMQTYASEVIGLEFTQQQRAGFKQLTSQ | DADIEPLIILAEAVEQAQYYTRHHSKFQHD   | NYHQL                          | 676    |       |       |  |
| BAF76001.1_NahB_A. hydrophila  | ----- | FSG-TTKHVNK--ATLNKEWNQFANVLGQ  | RVLPLKLDQAGVEYRLSVPGAKVVNGVLE    | ANVDLP                         | 840    |       |       |  |
| BAI94822.1_BbhI_B. bifidum     | ----- | -----                          | FVARLPGQLHILDQLQVRYRVP           |                                | 616    |       |       |  |
| AAQ05800.1_Hex20A_C. fimi      | ----- | TPRTSQDSGQVTKADLYVKANANDEWKQ   | VATDQVFEASRAKKTTFMFDEQEVRYVK     | FVAKSSNDGW                     | 1275   |       |       |  |
| BAI63641.1_Hex1t_Paenibacillus | ----- | RVAQHAPFWDVRGCFRWHASPQVSWPGPS  | SAPGAAF                          |                                | 496    |       |       |  |
| CAA55582.1_NahA_P. gingivalis  | ----- | RLIEHTPRLQNKGIKFFADP-IVWELPIVQ | INSEWKMDGTGTVVKDTSGYLNGTLVGG     | AKWT                           | 542    |       |       |  |
| BAA84281.1_Hex99_P. piscicida  | ----- | RLDNACVRLDMHCINHYHPLPEQPGGS    | DFIAFTDKAKLTFTTSRPMKMVYTLD       | ETEPSLTST                      | 579    |       |       |  |
| BAB84321.1_Hex86_P. piscicida  | ----- | -----                          | WHTFTNTLTGQYALPLDDYYQVVDINAQ     | IPQQVGVNYRIPLPGAIEGGKLI        | VNTRFV | 867   |       |  |
| AAB03808.1_Chb_S. marcescens   | ----- | RLPALLKRYQKMHLNTAYSSHKP--IISSE | INGQQLIATITSEIADTVIYYTLDGSE      | PTLQSQ                         | 581    |       |       |  |
| AAS02154.1_GcnA_S. gordonii    | ----- | YKGGETHFVDT--QALEKDWLRFANILGQ  | RELAKLDKGGVAYRLPVPGARVAAGKLE     | ANIALP                         | 838    |       |       |  |
| AAK98861.1_StrH_S. pneumoniae  | ----- | -----                          | KEHLSALAEKDFPQLYQMVEDFSDQFSRQ    | WQENKIFGLDTIDIRFGLLKRIKRAQERLE | 578    |       |       |  |
| CAB87223.1_HexA_S. coelicolor  | ----- | AALQGLKPAATHSGSLDENEVAANVETR   | PELITRTEEIPFEVIKKENPNLPAGQENI    | ITAGVKGERTHYI                  | 1105   |       |       |  |
| AAC38798.3_SpHex_S. plicatus   | ----- | RLAGQAPHWEAMCIDYRSPQVPWT       |                                  |                                | 535    |       |       |  |
| AKC34128.1_Hex1_uncultured Act | ----- | RLAAQAPYWEAAGIDFYRSPQVPWT      |                                  |                                | 506    |       |       |  |
| AKC34129.1_Hex2_uncultured Bac | ----- | RLAHGPRLEGLCVNFFRAPEIDWPETL    |                                  |                                | 494    |       |       |  |
| AAC44672.1_ExoI_V. furnissii   | ----- | RLLEGIMQHYEAGNLHYCKPSTEK       |                                  |                                | 537    |       |       |  |
| AAA88682.1_Chb_V. harveyi      | ----- | -----                          | KIPA                             |                                | 611    |       |       |  |
| AAD30612.1_AtHex1_A. thaliana  | ----- | YSQ-NSNLVDK--ASLNQDYNRFANVLGQ  | RELAKLEKSGIDYRLPVPGAKVEDGKL      | AMNVQFP                        | 836    |       |       |  |
| AAM91092.1_AtHex3_A. thaliana  | ----- | VDRLNLWRYRMVKRGIGAE--PIQPLWCL  | KNPGMCNTVHGALQDQ                 |                                | 580    |       |       |  |
| BAE99290.1_AtHex3_A. thaliana  | ----- | RLAHFRCLLNQRCVAAA--PLVGG-GRVVP | FEPGSCLAQ                        |                                | 535    |       |       |  |
| AAM13977.1_HexA_A. oryzae      | ----- | BRLLHYFRCLLNRRVPA--PVDNFYAR    | REPLGPGSCYAQ                     |                                | 541    |       |       |  |
| AAT99455.1_BmGlcNAcase3_B. mor | ----- | TQILNLFREYLVANGVQAQ--ALVPKYCLQ | HPHACDLYRNQAAIQ                  |                                | 600    |       |       |  |
| AAC60521.1_BmChiGlcNAcase_B. m | ----- | RLLEHTCRMNARGIHAQ--PPSGPGFCLG  | V                                |                                | 536    |       |       |  |
| CCD73477.2_CeHEX-4_C. elegans  | ----- | RMLHVRERLVRMGIQAE--SLEPEWCYQ   | NQGLCYG                          |                                | 596    |       |       |  |
| AAA34346.2_Hex1_C. albicans    | ----- | LKKSLSNQSILYKTDADDEVFNQYLHDY   | HSLIAQNTREITN                    |                                | 491    |       |       |  |
| ADU20405.1_βHex_C. annum       | ----- | TQILNLFREYLVKLGYGVS--PLVPKYCL  | LNPHACDLYKNPPVY                  |                                | 562    |       |       |  |
| ABB18373.1_CpHEX1_C. posadasii | ----- | TDRLTEWRYRMVARGIGAE--PIQPLWC   | VKNSGMCNTVHSFTS                  |                                | 574    |       |       |  |
| AAA33230.1_NagA_D. discoideum  | ----- | TQILNLFREYLVANGIMAA--PLQPKYCL  | KHPHSCDLYYDQTVIM                 |                                | 595    |       |       |  |
| AAF46406.1_Hex2_D. melanogaste | ----- | RIGHFTCDLSRRGIQS--GPLFPDYCP    | MQDDLVTMPKNTKLSKSEIKLILNK        |                                | 532    |       |       |  |
| AAF47881.1_Hex1_D. melanogaste | ----- | RFYRYRERLLARCIHAD--AVIPHWCVL   | HEGQCL                           |                                | 622    |       |       |  |
| AAM29423.1_Fdl_D. melanogaster | ----- | RLLLHRQRLVDNGLGAE--AMQPQWCLQ   | NEHECPIDACSRGSRGLGLIVLLLLTTLSA   |                                | 622    |       |       |  |
| CAE46968.1_HexA_E. histolytica | ----- | FRRLSLFRNRLVELGIRAE--ALFPKYCA  | QNPGECI                          |                                | 660    |       |       |  |
| AAB00965.1_HexA_H. sapiens     | ----- | RANYLRCLDVRRDIMKGTGPLYHSFCQLP  | KKEKSN                           |                                | 564    |       |       |  |
| AAA52645.1_HexB_H. sapiens     | ----- | RLSHFRCELLRRGVQAQ--PLN-VGFCEQ  | EFEQT                            |                                | 529    |       |       |  |
| AAC53246.1_HexA_M. musculus    | ----- | RLTRHRCRMVERGIAAQ--PLY-AGYCN   | HENM                             |                                | 556    |       |       |  |
| AAA18776.1_HexB_M. musculus    | ----- | RLSHFRCELVRRIQAQ--PLS-VGYCEQ   | EFEQT                            |                                | 528    |       |       |  |
| ABI81756.1_Hex1_O. furnacalis  | ----- | RLAVHRCRMVSRGIAAQ--PLS-TGYC    | NYENKI                           |                                | 536    |       |       |  |
| AEQ33603.1_HexTF_T. flavus     | ----- | RMLHIRERLVRMGIQAE--SLQPEWCYQ   | NEGYCYS                          |                                | 594    |       |       |  |
| ACI15900.1_NagA_T. maritima    | ----- | TQILNLFREYLVANGVQAA--PLVPKYCLQ | HPHSCDLYYDQTA                    | VV                             | 628    |       |       |  |
| AAK16587.1_CbsA_T. neapolitana | ----- | -----                          | GRKIVVTRSTKPISIYKSLEHFLGR        | CDS                            | 467    |       |       |  |
| CAA63123.1_HexB_S. scrofa      | ----- | -----                          | GRSVVITHSTKPISVYKSFQHLLGR        | CDS                            | 467    |       |       |  |
|                                | ----- | RLTIHRCRMVRRGIAAE--PLF-TGYC    | NHEHRM                           |                                | 531    |       |       |  |

|                                | 1410                                                             | 1420        | 1430          | 1440           | 1450        | 1460            | 1470       |                |         |
|--------------------------------|------------------------------------------------------------------|-------------|---------------|----------------|-------------|-----------------|------------|----------------|---------|
| WP_082768773.1_Nah20B_P. hydro | .... .... .... .... .... .... .... .... .... .... .... .... .... | GLTIEYQQE   | GEKQWQVYSQ    | VPVK--VTKPVLLR | SSMPGLLRYSR | SVSVSMQ         | QKVEE----- | 879            |         |
| WP_068373836.1_Nah20A_P. hydro |                                                                  | VELNQYVDYLS | SAQSLGLVELK   | RHIELFQQGDQ    | QAKKFIEQLLQ | KWQKNLPKLK      | LLIANYPKLH | SLAPLVT 746    |         |
| BAD00143.1_Nah20A_A. hydrophil |                                                                  | GLPIQYSLDG- | KSWSAYDAAAK   | PTVDGKVYLRT    | TTSFSGKRTSR | VTETLN-----     |            | 887            |         |
| BAF76001.1_NahB_A. hydrophila  |                                                                  | QR-----     |               |                |             |                 |            | 618            |         |
| BAI94822.1_BbhI_B. bifidum     |                                                                  | VAVSEFGVANK | PSSTVRVFVA    | ADPAEGGTVS     | VAAEGETGTD  | TAVDVASGAS      | VTAKAVAADG | YRFSGWFTT 1345 |         |
| AAQ05800.1_Hex20A_C. fimi      |                                                                  | -----       |               |                |             |                 |            | 496            |         |
| BAI63641.1_Hex1t_Paenibacillus |                                                                  | AGKQNGVSV   | FDGSSGYINL    | GQDITGNWTA     | AVWVYGQPN   | TTNNETLLS       | GTTSAIKINQ | YNKTGKVGIT     | IY 612  |
| CAA55582.1_NahA_P. gingivalis  |                                                                  | PYTVPLEFA   | QTGLLKIR----- | TVTAGG--       | KMSPVRRIR   | VEKQPFNMS       | MEVPAPKPGL | TIRTA 635      |         |
| BAA84281.1_Hex99_P. piscicida  |                                                                  | GMATEYSVD   | QGVTWHRYE     | GPVTLTASSK     | VQLRTVSDSG  | KVSRVATVN-----  |            | 914            |         |
| BAB84321.1_Hex86_P. piscicida  |                                                                  | QYQKPLVIT   | DETAXRAR----- | SYVSDLGQL      | VGDARLTLS   | PHLALGKEIT      | LASLAAEGS  | ATKL 639       |         |
| AAB03808.1_Chb_S. marcescens   |                                                                  | GLGIEYSTD   | GKGQWQRYDA    | KAKPAVSGEV     | QVRSVSPDG   | KRYSRAEKV-----  |            | 885            |         |
| AAS02154.1_GcnA_S. gordonii    |                                                                  | QFISQIDCV   | EELEQEILP     | FNDFYKDQGL     | TATTANQWHL  | IATASTIYTT----- |            | 627            |         |
| AAK98861.1_StrH_S. pneumoniae  |                                                                  | SVLTENGKT   | TETVLD        | SQVTKVINQ      | VVEVGSPVTH  | KDESGLAPTTE     | VKPRLDIQEE | EIPFTTVTREN    | PL 1175 |
| CAB87223.1_HexA_S. coelicolor  |                                                                  | -----       |               |                |             |                 |            | 535            |         |
| AAC38798.3_SpHex_S. plicatus   |                                                                  | -----       |               |                |             |                 |            | 506            |         |
| AKC34128.1_Hex1_uncultured Act |                                                                  | -----       |               |                |             |                 |            | 494            |         |
| AKC34129.1_Hex2_uncultured Bac |                                                                  | -----       |               |                |             |                 |            | 537            |         |
| AAC44672.1_ExoI_V. furnissii   |                                                                  | -----       |               |                |             |                 |            | 611            |         |
| AAA88682.1_Chb_V. harveyi      |                                                                  | GVTTLQYSL   | DG-ENWLT      | YADNARPN       | VTGEVFIRS   | VVSATGEK        | VSRITSVK-- | 883            |         |
| AAD30612.1_AtHex1_A. thaliana  |                                                                  | -----       |               |                |             |                 |            | 580            |         |
| AAM91092.1_AtHex3_A. thaliana  |                                                                  | -----       |               |                |             |                 |            | 535            |         |
| BAE99290.1_AtHex3_A. thaliana  |                                                                  | -----       |               |                |             |                 |            | 541            |         |
| AAM13977.1_HexA_A. oryzae      |                                                                  | -----       |               |                |             |                 |            | 600            |         |
| AAT99455.1_BmGlcNAcase3_B. mor |                                                                  | -----       |               |                |             |                 |            | 536            |         |
| AAC60521.1_BmChiGlcNAcase_B. m |                                                                  | -----       |               |                |             |                 |            | 596            |         |
| CCD73477.2_CeHEX-4_C. elegans  |                                                                  | -----       |               |                |             |                 |            | 491            |         |
| AAA34346.2_Hex1_C. albicans    |                                                                  | -----       |               |                |             |                 |            | 562            |         |
| ADU20405.1_β Hex_C. annuum     |                                                                  | -----       |               |                |             |                 |            | 574            |         |
| ABB18373.1_CpHEX1_C. posadasii |                                                                  | -----       |               |                |             |                 |            | 595            |         |
| AAA33230.1_NagA_D. discoideum  |                                                                  | -----       |               |                |             |                 |            | 532            |         |
| AAF46406.1_Hex2_D. melanogaste |                                                                  | -----       |               |                |             |                 |            | 622            |         |
| AAF47881.1_Hex1_D. melanogaste |                                                                  | -----       |               |                |             |                 |            | 622            |         |
| AAM29423.1_Fdl_D. melanogaster |                                                                  | -----       |               |                |             |                 |            | 660            |         |
| CAE46968.1_HexA_E. histolytica |                                                                  | -----       |               |                |             |                 |            | 564            |         |
| AAB00965.1_HexA_H. sapiens     |                                                                  | -----       |               |                |             |                 |            | 529            |         |
| AAA52645.1_HexB_H. sapiens     |                                                                  | -----       |               |                |             |                 |            | 556            |         |
| AAC53246.1_HexA_M. musculus    |                                                                  | -----       |               |                |             |                 |            | 528            |         |
| AAA18776.1_HexB_M. musculus    |                                                                  | -----       |               |                |             |                 |            | 536            |         |
| ABI81756.1_Hex1_O. furnacalis  |                                                                  | -----       |               |                |             |                 |            | 594            |         |
| AEQ33603.1_HexTF_T. flavus     |                                                                  | -----       |               |                |             |                 |            | 628            |         |
| ACI15900.1_NagA_T. maritima    |                                                                  | -----       |               |                |             |                 |            | 467            |         |
| AAK16587.1_CbsA_T. neapolitana |                                                                  | -----       |               |                |             |                 |            | 467            |         |
| CAA63123.1_HexB_S. scrofa      |                                                                  | -----       |               |                |             |                 |            | 531            |         |

|                                | 1480                                            | 1490 | 1500 | 1510 | 1520 | 1530 | 1540 |      |
|--------------------------------|-------------------------------------------------|------|------|------|------|------|------|------|
| WP_082768773.1_Nah20B_P. hydro | ..... ..... ..... ..... ..... ..... ..... ..... |      |      |      |      |      |      | 879  |
| WP_068373836.1_Nah20A_P. hydro | ..... ..... ..... ..... ..... ..... ..... ..... |      |      |      |      |      |      | 807  |
| BAD00143.1_Nah20A_A. hydrophil | -----                                           |      |      |      |      |      |      | 887  |
| BAF76001.1_NahB_A. hydrophila  | -----                                           |      |      |      |      |      |      | 618  |
| BAI94822.1_BbhI_B. bifidum     | -----                                           |      |      |      |      |      |      | 1415 |
| AAQ05800.1_Hex20A_C. fimi      | -----                                           |      |      |      |      |      |      | 496  |
| BAI63641.1_Hex1t_Paenibacillus | -----                                           |      |      |      |      |      |      | 682  |
| CAA55582.1_NahA_P. gingivalis  | -----                                           |      |      |      |      |      |      | 705  |
| BAA84281.1_Hex99_P. piscicida  | -----                                           |      |      |      |      |      |      | 914  |
| BAB84321.1_Hex86_P. piscicida  | -----                                           |      |      |      |      |      |      | 708  |
| AAB03808.1_Chb_S. marcescens   | -----                                           |      |      |      |      |      |      | 885  |
| AAS02154.1_GcnA_S. gordonii    | -----                                           |      |      |      |      |      |      | 627  |
| AAK98861.1_StrH_S. pneumoniae  | -----                                           |      |      |      |      |      |      | 1245 |
| CAB87223.1_HexA_S. coelicolor  | -----                                           |      |      |      |      |      |      | 535  |
| AAC38798.3_SpHex_S. plicatus   | -----                                           |      |      |      |      |      |      | 506  |
| AKC34128.1_Hex1_uncultured Act | -----                                           |      |      |      |      |      |      | 494  |
| AKC34129.1_Hex2_uncultured Bac | -----                                           |      |      |      |      |      |      | 537  |
| AAC44672.1_ExoI_V. furnissii   | -----                                           |      |      |      |      |      |      | 611  |
| AAA88682.1_Chb_V. harveyi      | -----                                           |      |      |      |      |      |      | 883  |
| AAD30612.1_AtHex1_A. thaliana  | -----                                           |      |      |      |      |      |      | 580  |
| AAM91092.1_AtHex3_A. thaliana  | -----                                           |      |      |      |      |      |      | 535  |
| BAE99290.1_AtHex3_A. thaliana  | -----                                           |      |      |      |      |      |      | 541  |
| AAM13977.1_HexA_A. oryzae      | -----                                           |      |      |      |      |      |      | 600  |
| AAT99455.1_BmGlcNAcase3_B. mor | -----                                           |      |      |      |      |      |      | 536  |
| AAC60521.1_BmChiGlcNAcase_B. m | -----                                           |      |      |      |      |      |      | 596  |
| CCD73477.2_CeHEX-4_C. elegans  | -----                                           |      |      |      |      |      |      | 491  |
| AAA34346.2_Hex1_C. albicans    | -----                                           |      |      |      |      |      |      | 562  |
| ADU20405.1_βHex_C. annuum      | -----                                           |      |      |      |      |      |      | 574  |
| ABB18373.1_CpHEX1_C. posadasii | -----                                           |      |      |      |      |      |      | 595  |
| AAA33230.1_NagA_D. discoideum  | -----                                           |      |      |      |      |      |      | 532  |
| AAF46406.1_Hex2_D. melanogaste | -----                                           |      |      |      |      |      |      | 622  |
| AAF47881.1_Hex1_D. melanogaste | -----                                           |      |      |      |      |      |      | 622  |
| AAM29423.1_Fdl_D. melanogaster | -----                                           |      |      |      |      |      |      | 660  |
| CAE46968.1_HexA_E. histolytica | -----                                           |      |      |      |      |      |      | 564  |
| AAB00965.1_HexA_H. sapiens     | -----                                           |      |      |      |      |      |      | 529  |
| AAA52645.1_HexB_H. sapiens     | -----                                           |      |      |      |      |      |      | 556  |
| AAC53246.1_HexA_M. musculus    | -----                                           |      |      |      |      |      |      | 528  |
| AAA18776.1_HexB_M. musculus    | -----                                           |      |      |      |      |      |      | 536  |
| ABI81756.1_Hex1_O. furnacalis  | -----                                           |      |      |      |      |      |      | 594  |
| AEQ33603.1_HexTF_T. flavus     | -----                                           |      |      |      |      |      |      | 628  |
| ACI15900.1_NagA_T. maritima    | -----                                           |      |      |      |      |      |      | 467  |
| AAK16587.1_CbsA_T. neapolitana | -----                                           |      |      |      |      |      |      | 467  |
| CAA63123.1_HexB_S. scrofa      | -----                                           |      |      |      |      |      |      | 531  |

|                                | 1550                                                                     | 1560 | 1570 | 1580 | 1590 | 1600 | 1610 |
|--------------------------------|--------------------------------------------------------------------------|------|------|------|------|------|------|
| WP_082768773.1_Nah20B_P. hydro | ..... ..... ..... ..... ..... ..... ..... .....                          |      |      |      |      |      | 879  |
| WP_068373836.1_Nah20A_P. hydro | -----                                                                    |      |      |      |      |      | 807  |
| BAD00143.1_Nah20A_A. hydrophil | -----                                                                    |      |      |      |      |      | 887  |
| BAF76001.1_NahB_A. hydrophila  | -----                                                                    |      |      |      |      |      | 618  |
| BAI94822.1_BbhI_B. bifidum     | SDGSTKTLTAGEYTLTSATQDGAVALDKAFKAGKVTVTVTANGKTATFDVTVAKDPDPEPATLKSIVK     |      |      |      |      |      | 1485 |
| AAQ05800.1_Hex20A_C. fimi      | -----                                                                    |      |      |      |      |      | 496  |
| BAI63641.1_Hex1t_Paenibacillus | DELKIFNRALSASEVVELAKSPAPKASLTGPGQSANPGQSFQVDMGLSDVSPSEFGQMYAQDWTINYDSAK  |      |      |      |      |      | 752  |
| CAA55582.1_NahA_P. gingivalis  | DNVKLIDNVGEVKKFSSRRNSSRALQKGYHPIKTIWVGAIQGAWPTYWNYSRVMIRLKGEEKFKPISSDML  |      |      |      |      |      | 775  |
| BAA84281.1_Hex99_P. piscicida  | -----                                                                    |      |      |      |      |      | 914  |
| BAB84321.1_Hex86_P. piscicida  | TLAEVNNPRGPM SVLSFAPVSVRFLKVVA INSKQSDDIQIPKLP LYIDEI AVY-----           |      |      |      |      |      | 761  |
| AAB03808.1_Chb_S. marcescens   | -----                                                                    |      |      |      |      |      | 885  |
| AAS02154.1_GcnA_S. gordonii    | -----                                                                    |      |      |      |      |      | 627  |
| AAK98861.1_StrH_S. pneumoniae  | KPKLEIP SQPAPSTAPAEESKALPQDPAPVVTEKKLPETGTHDS AELVVAGLMSTLAAYGLTKRKED--- |      |      |      |      |      | 1312 |
| CAB87223.1_HexA_S. coelicolor  | -----                                                                    |      |      |      |      |      | 535  |
| AAC38798.3_SpHex_S. plicatus   | -----                                                                    |      |      |      |      |      | 506  |
| AKC34128.1_Hex1_uncultured Act | -----                                                                    |      |      |      |      |      | 494  |
| AKC34129.1_Hex2_uncultured Bac | -----                                                                    |      |      |      |      |      | 537  |
| AAC44672.1_ExoI_V. furnissii   | -----                                                                    |      |      |      |      |      | 611  |
| AAA88682.1_Chb_V. harveyi      | -----                                                                    |      |      |      |      |      | 883  |
| AAD30612.1_AtHex1_A. thaliana  | -----                                                                    |      |      |      |      |      | 580  |
| AAM91092.1_AtHex3_A. thaliana  | -----                                                                    |      |      |      |      |      | 535  |
| BAE99290.1_AtHex3_A. thaliana  | -----                                                                    |      |      |      |      |      | 541  |
| AAM13977.1_HexA_A. oryzae      | -----                                                                    |      |      |      |      |      | 600  |
| AAT99455.1_BmGlcNAcase3_B. mor | -----                                                                    |      |      |      |      |      | 536  |
| AAC60521.1_BmChiGlcNAcase_B. m | -----                                                                    |      |      |      |      |      | 596  |
| CCD73477.2_CeHEX-4_C. elegans  | -----                                                                    |      |      |      |      |      | 491  |
| AAA34346.2_Hex1_C. albicans    | -----                                                                    |      |      |      |      |      | 562  |
| ADU20405.1_βHex_C. annuum      | -----                                                                    |      |      |      |      |      | 574  |
| ABB18373.1_CpHEX1_C. posadasii | -----                                                                    |      |      |      |      |      | 595  |
| AAA33230.1_NagA_D. discoideum  | -----                                                                    |      |      |      |      |      | 532  |
| AAF46406.1_Hex2_D. melanogaste | -----                                                                    |      |      |      |      |      | 622  |
| AAF47881.1_Hex1_D. melanogaste | -----                                                                    |      |      |      |      |      | 622  |
| AAM29423.1_Fdl_D. melanogaster | -----                                                                    |      |      |      |      |      | 660  |
| CAE46968.1_HexA_E. histolytica | -----                                                                    |      |      |      |      |      | 564  |
| AAB00965.1_HexA_H. sapiens     | -----                                                                    |      |      |      |      |      | 529  |
| AAA52645.1_HexB_H. sapiens     | -----                                                                    |      |      |      |      |      | 556  |
| AAC53246.1_HexA_M. musculus    | -----                                                                    |      |      |      |      |      | 528  |
| AAA18776.1_HexB_M. musculus    | -----                                                                    |      |      |      |      |      | 536  |
| ABI81756.1_Hex1_O. furnacalis  | -----                                                                    |      |      |      |      |      | 594  |
| AEQ33603.1_HexTF_T. flavus     | -----                                                                    |      |      |      |      |      | 628  |
| ACI15900.1_NagA_T. maritima    | -----                                                                    |      |      |      |      |      | 467  |
| AAK16587.1_CbsA_T. neapolitana | -----                                                                    |      |      |      |      |      | 467  |
| CAA63123.1_HexB_S. scrofa      | -----                                                                    |      |      |      |      |      | 531  |

|                                | 1620                                            | 1630           | 1640      | 1650       | 1660        | 1670       | 1680                  |
|--------------------------------|-------------------------------------------------|----------------|-----------|------------|-------------|------------|-----------------------|
|                                | ..... ..... ..... ..... ..... ..... ..... ..... |                |           |            |             |            |                       |
| WP_082768773.1_Nah20B_P. hydro | -----                                           |                |           |            |             |            | 879                   |
| WP_068373836.1_Nah20A_P. hydro | -----                                           |                |           |            |             |            | 807                   |
| BAD00143.1_Nah20A_A. hydrophil | -----                                           |                |           |            |             |            | 887                   |
| BAF76001.1_NahB_A. hydrophila  | -----                                           |                |           |            |             |            | 618                   |
| BAI94822.1_BbhI_B. bifidum     | TSKPKDKTTYTVDETF                                | AKTGLAVTGTWSDG | KTALLKDG  | EYKLSAVD   | ADGKTVDLTKP | FTAAGDVTVT | TSG 1555              |
| AAQ05800.1_Hex20A_C. fimi      | -----                                           |                |           |            |             |            | 496                   |
| BAI63641.1_Hex1t_Paenibacillus | LQLDSITS                                        | LQDKFQVIDQ     | KELAPGQIR | IVAANAAANQ | GVTPQGD     | LFAFKFTVK  | AGTDVKTTISADHIVIG 822 |
| CAA55582.1_NahA_P. gingivalis  | FQ-----                                         |                |           |            |             |            | 777                   |
| BAA84281.1_Hex99_P. piscicida  | -----                                           |                |           |            |             |            | 914                   |
| BAB84321.1_Hex86_P. piscicida  | -----                                           |                |           |            |             |            | 761                   |
| AAB03808.1_Chb_S. marcescens   | -----                                           |                |           |            |             |            | 885                   |
| AAS02154.1_GcnA_S. gordonii    | -----                                           |                |           |            |             |            | 627                   |
| AAK98861.1_StrH_S. pneumoniae  | -----                                           |                |           |            |             |            | 1312                  |
| CAB87223.1_HexA_S. coelicolor  | -----                                           |                |           |            |             |            | 535                   |
| AAC38798.3_SpHex_S. plicatus   | -----                                           |                |           |            |             |            | 506                   |
| AKC34128.1_Hex1_uncultured Act | -----                                           |                |           |            |             |            | 494                   |
| AKC34129.1_Hex2_uncultured Bac | -----                                           |                |           |            |             |            | 537                   |
| AAC44672.1_ExoI_V. furnissii   | -----                                           |                |           |            |             |            | 611                   |
| AAA88682.1_Chb_V. harveyi      | -----                                           |                |           |            |             |            | 883                   |
| AAD30612.1_AtHex1_A. thaliana  | -----                                           |                |           |            |             |            | 580                   |
| AAM91092.1_AtHex3_A. thaliana  | -----                                           |                |           |            |             |            | 535                   |
| BAE99290.1_AtHex3_A. thaliana  | -----                                           |                |           |            |             |            | 541                   |
| AAM13977.1_HexA_A. oryzae      | -----                                           |                |           |            |             |            | 600                   |
| AAT99455.1_BmGlcNAcase3_B. mor | -----                                           |                |           |            |             |            | 536                   |
| AAC60521.1_BmChiGlcNAcase_B. m | -----                                           |                |           |            |             |            | 596                   |
| CCD73477.2_CeHEX-4_C. elegans  | -----                                           |                |           |            |             |            | 491                   |
| AAA34346.2_Hex1_C. albicans    | -----                                           |                |           |            |             |            | 562                   |
| ADU20405.1_β Hex_C. annuum     | -----                                           |                |           |            |             |            | 574                   |
| ABB18373.1_CpHEX1_C. posadasii | -----                                           |                |           |            |             |            | 595                   |
| AAA33230.1_NagA_D. discoideum  | -----                                           |                |           |            |             |            | 532                   |
| AAF46406.1_Hex2_D. melanogaste | -----                                           |                |           |            |             |            | 622                   |
| AAF47881.1_Hex1_D. melanogaste | -----                                           |                |           |            |             |            | 622                   |
| AAM29423.1_Fdl_D. melanogaster | -----                                           |                |           |            |             |            | 660                   |
| CAE46968.1_HexA_E. histolytica | -----                                           |                |           |            |             |            | 564                   |
| AAB00965.1_HexA_H. sapiens     | -----                                           |                |           |            |             |            | 529                   |
| AAA52645.1_HexB_H. sapiens     | -----                                           |                |           |            |             |            | 556                   |
| AAC53246.1_HexA_M. musculus    | -----                                           |                |           |            |             |            | 528                   |
| AAA18776.1_HexB_M. musculus    | -----                                           |                |           |            |             |            | 536                   |
| ABI81756.1_Hex1_O. furnacalis  | -----                                           |                |           |            |             |            | 594                   |
| AEQ33603.1_HexTF_T. flavus     | -----                                           |                |           |            |             |            | 628                   |
| ACI15900.1_NagA_T. maritima    | -----                                           |                |           |            |             |            | 467                   |
| AAK16587.1_CbsA_T. neapolitana | -----                                           |                |           |            |             |            | 467                   |
| CAA63123.1_HexB_S. scrofa      | -----                                           |                |           |            |             |            | 531                   |

|                                | 1690                                            | 1700   | 1710     | 1720   | 1730    | 1740    | 1750                                 |      |
|--------------------------------|-------------------------------------------------|--------|----------|--------|---------|---------|--------------------------------------|------|
|                                | ..... ..... ..... ..... ..... ..... ..... ..... |        |          |        |         |         |                                      |      |
| WP_082768773.1_Nah20B_P. hydro | -----                                           |        |          |        |         |         | 879                                  |      |
| WP_068373836.1_Nah20A_P. hydro | -----                                           |        |          |        |         |         | 807                                  |      |
| BAD00143.1_Nah20A_A. hydrophil | -----                                           |        |          |        |         |         | 887                                  |      |
| BAF76001.1_NahB_A. hydrophila  | -----                                           |        |          |        |         |         | 618                                  |      |
| BAI94822.1_BbhI_B. bifidum     | KLTD                                            | SFTITV | KAKTVT   | PAPGDN | KPGENK  | PGADKPK | NPNTPDEVAKTGASVTAVVFSALLLLSAGYLLVRKR | 1625 |
| AAQ05800.1_Hex20A_C. fimi      | -----                                           |        |          |        |         |         | 496                                  |      |
| BAI63641.1_Hex1t_Paenibacillus | NAQG                                            | KELEI  | IAGATHEI | QVSI   | PVDKSQL | NVLIANA | QAKHDAAVEGNEDGLYAAGSKAQLQTAIHTAKAVAD | 892  |
| CAA55582.1_NahA_P. gingivalis  | -----                                           |        |          |        |         |         | 777                                  |      |
| BAA84281.1_Hex99_P. piscicida  | -----                                           |        |          |        |         |         | 914                                  |      |
| BAB84321.1_Hex86_P. piscicida  | -----                                           |        |          |        |         |         | 761                                  |      |
| AAB03808.1_Chb_S. marcescens   | -----                                           |        |          |        |         |         | 885                                  |      |
| AAS02154.1_GcnA_S. gordonii    | -----                                           |        |          |        |         |         | 627                                  |      |
| AAK98861.1_StrH_S. pneumoniae  | -----                                           |        |          |        |         |         | 1312                                 |      |
| CAB87223.1_HexA_S. coelicolor  | -----                                           |        |          |        |         |         | 535                                  |      |
| AAC38798.3_SpHex_S. plicatus   | -----                                           |        |          |        |         |         | 506                                  |      |
| AKC34128.1_Hex1_uncultured Act | -----                                           |        |          |        |         |         | 494                                  |      |
| AKC34129.1_Hex2_uncultured Bac | -----                                           |        |          |        |         |         | 537                                  |      |
| AAC44672.1_ExoI_V. furnissii   | -----                                           |        |          |        |         |         | 611                                  |      |
| AAA88682.1_Chb_V. harveyi      | -----                                           |        |          |        |         |         | 883                                  |      |
| AAD30612.1_AtHex1_A. thaliana  | -----                                           |        |          |        |         |         | 580                                  |      |
| AAM91092.1_AtHex3_A. thaliana  | -----                                           |        |          |        |         |         | 535                                  |      |
| BAE99290.1_AtHex3_A. thaliana  | -----                                           |        |          |        |         |         | 541                                  |      |
| AAM13977.1_HexA_A. oryzae      | -----                                           |        |          |        |         |         | 600                                  |      |
| AAT99455.1_BmGlcNAcase3_B. mor | -----                                           |        |          |        |         |         | 536                                  |      |
| AAC60521.1_BmChiGlcNAcase_B. m | -----                                           |        |          |        |         |         | 596                                  |      |
| CCD73477.2_CeHEX-4_C. elegans  | -----                                           |        |          |        |         |         | 491                                  |      |
| AAA34346.2_Hex1_C. albicans    | -----                                           |        |          |        |         |         | 562                                  |      |
| ADU20405.1_βHex_C. annum       | -----                                           |        |          |        |         |         | 574                                  |      |
| ABB18373.1_CpHEX1_C. posadasii | -----                                           |        |          |        |         |         | 595                                  |      |
| AAA33230.1_NagA_D. discoideum  | -----                                           |        |          |        |         |         | 532                                  |      |
| AAF46406.1_Hex2_D. melanogaste | -----                                           |        |          |        |         |         | 622                                  |      |
| AAF47881.1_Hex1_D. melanogaste | -----                                           |        |          |        |         |         | 622                                  |      |
| AAM29423.1_Fdl_D. melanogaster | -----                                           |        |          |        |         |         | 660                                  |      |
| CAE46968.1_HexA_E. histolytica | -----                                           |        |          |        |         |         | 564                                  |      |
| AAB00965.1_HexA_H. sapiens     | -----                                           |        |          |        |         |         | 529                                  |      |
| AAA52645.1_HexB_H. sapiens     | -----                                           |        |          |        |         |         | 556                                  |      |
| AAC53246.1_HexA_M. musculus    | -----                                           |        |          |        |         |         | 528                                  |      |
| AAA18776.1_HexB_M. musculus    | -----                                           |        |          |        |         |         | 536                                  |      |
| ABI81756.1_Hex1_O. furnacalis  | -----                                           |        |          |        |         |         | 594                                  |      |
| AEQ33603.1_HexTF_T. flavus     | -----                                           |        |          |        |         |         | 628                                  |      |
| ACI15900.1_NagA_T. maritima    | -----                                           |        |          |        |         |         | 467                                  |      |
| AAK16587.1_CbsA_T. neapolitana | -----                                           |        |          |        |         |         | 467                                  |      |
| CAA63123.1_HexB_S. scrofa      | -----                                           |        |          |        |         |         | 531                                  |      |

|                                | 1760                                            | 1770 | 1780 | 1790 | 1800 | 1810 | 1820 |
|--------------------------------|-------------------------------------------------|------|------|------|------|------|------|
|                                | ..... ..... ..... ..... ..... ..... ..... ..... |      |      |      |      |      |      |
| WP_082768773.1_Nah20B_P. hydro | -----                                           |      |      |      |      |      | 879  |
| WP_068373836.1_Nah20A_P. hydro | -----                                           |      |      |      |      |      | 807  |
| BAD00143.1_Nah20A_A. hydrophil | -----                                           |      |      |      |      |      | 887  |
| BAF76001.1_NahB_A. hydrophila  | -----                                           |      |      |      |      |      | 618  |
| BAI94822.1_BbhI_B. bifidum     | RI-----                                         |      |      |      |      |      | 1627 |
| AAQ05800.1_Hex20A_C. fimi      | -----                                           |      |      |      |      |      | 496  |
| BAI63641.1_Hex1t_Paenibacillus | NSNASQQQVDSAKSALEEAVQVFESKKISADVNGDGQVSI        |      |      |      |      |      | 962  |
| CAA55582.1_NahA_P. gingivalis  | -----                                           |      |      |      |      |      | 777  |
| BAA84281.1_Hex99_P. piscicida  | -----                                           |      |      |      |      |      | 914  |
| BAB84321.1_Hex86_P. piscicida  | -----                                           |      |      |      |      |      | 761  |
| AAB03808.1_Chb_S. marcescens   | -----                                           |      |      |      |      |      | 885  |
| AAS02154.1_GcnA_S. gordonii    | -----                                           |      |      |      |      |      | 627  |
| AAK98861.1_StrH_S. pneumoniae  | -----                                           |      |      |      |      |      | 1312 |
| CAB87223.1_HexA_S. coelicolor  | -----                                           |      |      |      |      |      | 535  |
| AAC38798.3_SpHex_S. plicatus   | -----                                           |      |      |      |      |      | 506  |
| AKC34128.1_Hex1_uncultured Act | -----                                           |      |      |      |      |      | 494  |
| AKC34129.1_Hex2_uncultured Bac | -----                                           |      |      |      |      |      | 537  |
| AAC44672.1_ExoI_V. furnissii   | -----                                           |      |      |      |      |      | 611  |
| AAA88682.1_Chb_V. harveyi      | -----                                           |      |      |      |      |      | 883  |
| AAD30612.1_AtHex1_A. thaliana  | -----                                           |      |      |      |      |      | 580  |
| AAM91092.1_AtHex3_A. thaliana  | -----                                           |      |      |      |      |      | 535  |
| BAE99290.1_AtHex3_A. thaliana  | -----                                           |      |      |      |      |      | 541  |
| AAM13977.1_HexA_A. oryzae      | -----                                           |      |      |      |      |      | 600  |
| AAT99455.1_BmGlcNAcase3_B. mor | -----                                           |      |      |      |      |      | 536  |
| AAC60521.1_BmChiGlcNAcase_B. m | -----                                           |      |      |      |      |      | 596  |
| CCD73477.2_CeHEX-4_C. elegans  | -----                                           |      |      |      |      |      | 491  |
| AAA34346.2_Hex1_C. albicans    | -----                                           |      |      |      |      |      | 562  |
| ADU20405.1_βHex_C. annuum      | -----                                           |      |      |      |      |      | 574  |
| ABB18373.1_CpHEX1_C. posadasii | -----                                           |      |      |      |      |      | 595  |
| AAA33230.1_NagA_D. discoideum  | -----                                           |      |      |      |      |      | 532  |
| AAF46406.1_Hex2_D. melanogaste | -----                                           |      |      |      |      |      | 622  |
| AAF47881.1_Hex1_D. melanogaste | -----                                           |      |      |      |      |      | 622  |
| AAM29423.1_Fdl_D. melanogaster | -----                                           |      |      |      |      |      | 660  |
| CAE46968.1_HexA_E. histolytica | -----                                           |      |      |      |      |      | 564  |
| AAB00965.1_HexA_H. sapiens     | -----                                           |      |      |      |      |      | 529  |
| AAA52645.1_HexB_H. sapiens     | -----                                           |      |      |      |      |      | 556  |
| AAC53246.1_HexA_M. musculus    | -----                                           |      |      |      |      |      | 528  |
| AAA18776.1_HexB_M. musculus    | -----                                           |      |      |      |      |      | 536  |
| ABI81756.1_Hex1_O. furnacalis  | -----                                           |      |      |      |      |      | 594  |
| AEQ33603.1_HexTF_T. flavus     | -----                                           |      |      |      |      |      | 628  |
| ACI15900.1_NagA_T. maritima    | -----                                           |      |      |      |      |      | 467  |
| AAK16587.1_CbsA_T. neapolitana | -----                                           |      |      |      |      |      | 467  |
| CAA63123.1_HexB_S. scrofa      | -----                                           |      |      |      |      |      | 531  |

|                                |                     |      |
|--------------------------------|---------------------|------|
|                                | ..... ..... ..... . |      |
| WP_082768773.1_Nah20B_P. hydro | -----               | 879  |
| WP_068373836.1_Nah20A_P. hydro | -----               | 807  |
| BAD00143.1_Nah20A_A. hydrophil | -----               | 887  |
| BAF76001.1_NahB_A. hydrophila  | -----               | 618  |
| BAI94822.1_BbhI_B. bifidum     | -----               | 1627 |
| AAQ05800.1_Hex20A_C. fimi      | -----               | 496  |
| BAI63641.1_Hex1t_Paenibacillus | VDIIDLTIVAKAILQI    | 978  |
| CAA55582.1_NahA_P. gingivalis  | -----               | 777  |
| BAA84281.1_Hex99_P. piscicida  | -----               | 914  |
| BAB84321.1_Hex86_P. piscicida  | -----               | 761  |
| AAB03808.1_Chb_S. marcescens   | -----               | 885  |
| AAS02154.1_GcnA_S. gordonii    | -----               | 627  |
| AAK98861.1_StrH_S. pneumoniae  | -----               | 1312 |
| CAB87223.1_HexA_S. coelicolor  | -----               | 535  |
| AAC38798.3_SpHex_S. plicatus   | -----               | 506  |
| AKC34128.1_Hex1_uncultured Act | -----               | 494  |
| AKC34129.1_Hex2_uncultured Bac | -----               | 537  |
| AAC44672.1_ExoI_V. furnissii   | -----               | 611  |
| AAA88682.1_Chb_V. harveyi      | -----               | 883  |
| AAD30612.1_AtHex1_A. thaliana  | -----               | 580  |
| AAM91092.1_AtHex3_A. thaliana  | -----               | 535  |
| BAE99290.1_AtHex3_A. thaliana  | -----               | 541  |
| AAM13977.1_HexA_A. oryzae      | -----               | 600  |
| AAT99455.1_BmGlcNAcase3_B. mor | -----               | 536  |
| AAC60521.1_BmChiGlcNAcase_B. m | -----               | 596  |
| CCD73477.2_CeHEX-4_C. elegans  | -----               | 491  |
| AAA34346.2_Hex1_C. albicans    | -----               | 562  |
| ADU20405.1_βHex_C. annum       | -----               | 574  |
| ABB18373.1_CpHEX1_C. posadasii | -----               | 595  |
| AAA33230.1_NagA_D. discoideum  | -----               | 532  |
| AAF46406.1_Hex2_D. melanogaste | -----               | 622  |
| AAF47881.1_Hex1_D. melanogaste | -----               | 622  |
| AAM29423.1_Fdl_D. melanogaster | -----               | 660  |
| CAE46968.1_HexA_E. histolytica | -----               | 564  |
| AAB00965.1_HexA_H. sapiens     | -----               | 529  |
| AAA52645.1_HexB_H. sapiens     | -----               | 556  |
| AAC53246.1_HexA_M. musculus    | -----               | 528  |
| AAA18776.1_HexB_M. musculus    | -----               | 536  |
| ABI81756.1_Hex1_O. furnacalis  | -----               | 594  |
| AEQ33603.1_HexTF_T. flavus     | -----               | 628  |
| ACI15900.1_NagA_T. maritima    | -----               | 467  |
| AAK16587.1_CbsA_T. neapolitana | -----               | 467  |
| CAA63123.1_HexB_S. scrofa      | -----               | 531  |

1. Mark, B.L.; Wasney, G.A.; Salo, T.J.; Khan, A.R.; Cao, Z.; Robbins, P.W.; James, M.N.; Triggs-Raine, B.L. Structural and functional characterization of *Streptomyces plicatus* beta-N-acetylhexosaminidase by comparative molecular modeling and site-directed mutagenesis. *J. Biol. Chem.* **1998**, 273, 19618–19624.
